# Supplementary material for: Duration of contact sports play associated with aberrant DNA methylation in human frontal cortex
Source: Research Square preprint supplement (doi:10.21203/rs.3.rs-7861173/v2), 2026-01-07
Supplement: Supplementary file 1 [file 5e0b95a8d07565ef3bfc51f6.xlsx]

## Sheet: Supplementary_Table_1
Chr	Pos	Beta	SE	P	Average_methylation	Closest_Gene	Function	FDR
chr17	30846258	-0.206859	0.0266139	1.43083e-11	0.866532	MYO1D	Intron	3.72985e-06
chr17	30846252	-0.206619	0.0266353	1.53637e-11	0.865951	MYO1D	Intron	3.72985e-06
chr17	30846242	-0.206151	0.026677	1.76399e-11	0.864971	MYO1D	Intron	3.72985e-06
chr17	30846239	-0.205994	0.0266909	1.8473e-11	0.864674	MYO1D	Intron	3.72985e-06
chr17	30846388	-0.20494	0.026784	2.51326e-11	0.877678	MYO1D	Intron	3.72985e-06
chr17	30846393	-0.204623	0.0268119	2.75488e-11	0.878053	MYO1D	Intron	3.72985e-06
chr17	30846210	-0.204089	0.0268586	3.21313e-11	0.861725	MYO1D	Intron	3.72985e-06
chr17	30846407	-0.203657	0.0268963	3.63766e-11	0.879084	MYO1D	Intron	3.72985e-06
chr17	30846204	-0.203609	0.0269004	3.68735e-11	0.861097	MYO1D	Intron	3.72985e-06
chr17	30846421	-0.20258	0.0269896	4.94122e-11	0.880086	MYO1D	Intron	3.72985e-06
chr17	30846190	-0.202379	0.0270069	5.23068e-11	0.859611	MYO1D	Intron	3.72985e-06
chr4	154606033	-0.201878	0.02705	6.0224e-11	0.863139	TLR2	Intron	3.72985e-06
chr4	154606018	-0.201848	0.0270525	6.07197e-11	0.863043	TLR2	Intron	3.72985e-06
chr4	154606004	-0.20182	0.0270549	6.12047e-11	0.862953	TLR2	Intron	3.72985e-06
chr4	154605993	-0.201797	0.0270569	6.16013e-11	0.862882	TLR2	Intron	3.72985e-06
chr4	154605984	-0.201778	0.0270586	6.19362e-11	0.862824	TLR2	Intron	3.72985e-06
chr4	154605979	-0.201767	0.0270595	6.21263e-11	0.862792	TLR2	Intron	3.72985e-06
chr4	154605970	-0.201747	0.0270612	6.24761e-11	0.862734	TLR2	Intron	3.72985e-06
chr4	154605961	-0.201726	0.027063	6.28355e-11	0.862675	TLR2	Intron	3.72985e-06
chr4	154605953	-0.201708	0.0270646	6.31634e-11	0.862624	TLR2	Intron	3.72985e-06
chr4	154605941	-0.201679	0.027067	6.36701e-11	0.862546	TLR2	Intron	3.72985e-06
chr4	154605929	-0.20165	0.0270695	6.41951e-11	0.862467	TLR2	Intron	3.72985e-06
chr4	154605893	-0.201557	0.0270775	6.58844e-11	0.862232	TLR2	Intron	3.72985e-06
chr4	154605870	-0.201494	0.0270829	6.70579e-11	0.862081	TLR2	Intron	3.72985e-06
chr4	154605857	-0.201457	0.0270861	6.77553e-11	0.861995	TLR2	Intron	3.72985e-06
chr4	154605788	-0.201244	0.0271042	7.19033e-11	0.861536	TLR2	Intron	3.72985e-06
chr4	154605768	-0.201177	0.02711	7.32573e-11	0.861402	TLR2	Intron	3.72985e-06
chr4	154605761	-0.201153	0.027112	7.37486e-11	0.861355	TLR2	Intron	3.72985e-06
chr4	154605751	-0.201118	0.027115	7.44664e-11	0.861288	TLR2	Intron	3.72985e-06
chr4	154605745	-0.201097	0.0271168	7.49064e-11	0.861247	TLR2	Intron	3.72985e-06
chr4	154605727	-0.201032	0.0271223	7.62692e-11	0.861126	TLR2	Intron	3.72985e-06
chr4	154605725	-0.201025	0.0271229	7.64246e-11	0.861112	TLR2	Intron	3.72985e-06
chr4	154605717	-0.200995	0.0271254	7.70548e-11	0.861058	TLR2	Intron	3.72985e-06
chr4	154605702	-0.200939	0.0271303	7.82729e-11	0.860956	TLR2	Intron	3.72985e-06
chr4	154605598	-0.200508	0.0271668	8.81843e-11	0.860242	TLR2	Intron	3.72985e-06
chr4	154605591	-0.200477	0.0271695	8.89544e-11	0.860194	TLR2	Intron	3.72985e-06
chr4	154605580	-0.200427	0.0271737	9.01939e-11	0.860117	TLR2	Intron	3.72985e-06
chr4	154605570	-0.200381	0.0271777	9.13525e-11	0.860048	TLR2	Intron	3.72985e-06
chr4	154605565	-0.200357	0.0271796	9.19435e-11	0.860013	TLR2	Intron	3.72985e-06
chr17	30846447	-0.200314	0.0271833	9.30459e-11	0.881868	MYO1D	Intron	3.72985e-06
chr11	91958736	-0.200092	0.027202	9.89005e-11	0.837715	FAT3	Intergenic (nearest gene 126525 bp away)	3.72985e-06
chr11	91958719	-0.200083	0.0272028	9.91588e-11	0.838985	FAT3	Intergenic (nearest gene 126542 bp away)	3.72985e-06
chr11	91958686	-0.200016	0.0272085	1.00993e-10	0.841564	FAT3	Intergenic (nearest gene 126575 bp away)	3.72985e-06
chr11	91958675	-0.199979	0.0272117	1.02043e-10	0.842454	FAT3	Intergenic (nearest gene 126586 bp away)	3.72985e-06
chr4	154605479	-0.199929	0.0272159	1.03455e-10	0.859408	TLR2	5_UTR	3.72985e-06
chr4	154605476	-0.199913	0.0272172	1.03907e-10	0.859387	TLR2	5_UTR	3.72985e-06
chr11	91958655	-0.199889	0.0272192	1.04583e-10	0.844107	FAT3	Intergenic (nearest gene 126606 bp away)	3.72985e-06
chr4	154605468	-0.19987	0.0272208	1.0513e-10	0.85933	TLR2	5_UTR	3.72985e-06
chr11	91958643	-0.199822	0.0272249	1.06535e-10	0.84512	FAT3	Intergenic (nearest gene 126618 bp away)	3.72985e-06
chr4	154605458	-0.199816	0.0272254	1.06697e-10	0.859259	TLR2	5_UTR	3.72985e-06
chr4	154605450	-0.199773	0.0272291	1.07983e-10	0.859202	TLR2	5_UTR	3.72985e-06
chr4	154605441	-0.199723	0.0272332	1.09463e-10	0.859138	TLR2	5_UTR	3.72985e-06
chr4	154605436	-0.199695	0.0272356	1.10301e-10	0.859102	TLR2	5_UTR	3.72985e-06
chr11	91958598	-0.199473	0.0272543	1.17201e-10	0.84904	FAT3	Intergenic (nearest gene 126663 bp away)	3.72985e-06
chr4	154605388	-0.199418	0.0272589	1.18972e-10	0.858758	TLR2	Intergenic (nearest gene 15 bp away)	3.72985e-06
chr4	154605384	-0.199395	0.0272609	1.19748e-10	0.858729	TLR2	Intergenic (nearest gene 19 bp away)	3.72985e-06
chr11	91958585	-0.199344	0.0272651	1.21413e-10	0.850204	FAT3	Intergenic (nearest gene 126676 bp away)	3.72985e-06
chr4	154605364	-0.199274	0.027271	1.23766e-10	0.858585	TLR2	Intergenic (nearest gene 39 bp away)	3.72985e-06
chr11	91958578	-0.199269	0.0272714	1.23921e-10	0.850836	FAT3	Intergenic (nearest gene 126683 bp away)	3.72985e-06
chr11	91958575	-0.199236	0.0272742	1.2505e-10	0.851108	FAT3	Intergenic (nearest gene 126686 bp away)	3.72985e-06
chr4	154605357	-0.199231	0.0272747	1.25227e-10	0.858534	TLR2	Intergenic (nearest gene 46 bp away)	3.72985e-06
chr11	91958573	-0.199213	0.0272761	1.25821e-10	0.85129	FAT3	Intergenic (nearest gene 126688 bp away)	3.72985e-06
chr4	154605346	-0.199162	0.0272804	1.27583e-10	0.858454	TLR2	Intergenic (nearest gene 57 bp away)	3.72985e-06
chr4	154605339	-0.199118	0.0272841	1.29121e-10	0.858403	TLR2	Intergenic (nearest gene 64 bp away)	3.72985e-06
chr4	154605335	-0.199093	0.0272862	1.30014e-10	0.858374	TLR2	Intergenic (nearest gene 68 bp away)	3.72985e-06
chr4	154605332	-0.199074	0.0272878	1.30691e-10	0.858352	TLR2	Intergenic (nearest gene 71 bp away)	3.72985e-06
chr4	154605327	-0.199042	0.0272905	1.31832e-10	0.858316	TLR2	Intergenic (nearest gene 76 bp away)	3.72985e-06
chr4	154605321	-0.199003	0.0272937	1.33223e-10	0.858272	TLR2	Intergenic (nearest gene 82 bp away)	3.72985e-06
chr11	91958540	-0.198797	0.027311	1.4088e-10	0.854325	FAT3	Intergenic (nearest gene 126721 bp away)	3.88706e-06
chr10	1101841	-0.198296	0.0273529	1.61365e-10	0.855797	IDI1	Intron	4.28086e-06
chr10	1101851	-0.198254	0.0273563	1.63184e-10	0.855931	IDI1	Intron	4.28086e-06
chr10	1101873	-0.198158	0.0273643	1.67471e-10	0.856223	IDI1	Intron	4.28086e-06
chr10	1101893	-0.198065	0.0273721	1.71726e-10	0.856489	IDI1	Intron	4.28086e-06
chr10	1101895	-0.198055	0.0273729	1.72171e-10	0.856516	IDI1	Intron	4.28086e-06
chr10	1101897	-0.198045	0.0273737	1.7262e-10	0.856542	IDI1	Intron	4.28086e-06
chr10	1101900	-0.198031	0.0273749	1.733e-10	0.856582	IDI1	Intron	4.28086e-06
chr10	1101905	-0.198006	0.027377	1.74451e-10	0.856648	IDI1	Intron	4.28086e-06
chr10	1101909	-0.197986	0.0273786	1.75389e-10	0.856701	IDI1	Intron	4.28086e-06
chr11	91959050	-0.197856	0.0273894	1.81622e-10	0.824973	FAT3	Intergenic (nearest gene 126211 bp away)	4.37687e-06
chr17	30846473	-0.197742	0.0273989	1.8728e-10	0.883553	MYO1D	Intron	4.4568e-06
chr11	91959062	-0.197584	0.027412	1.95359e-10	0.825053	FAT3	Intergenic (nearest gene 126199 bp away)	4.59167e-06
chr17	30846476	-0.197428	0.0274249	2.03722e-10	0.883741	MYO1D	Intron	4.72985e-06
chr11	91959082	-0.197087	0.0274531	2.23102e-10	0.82528	FAT3	Intergenic (nearest gene 126179 bp away)	5.11739e-06
chr11	91958440	-0.197031	0.0274577	2.26431e-10	0.863846	FAT3	Intergenic (nearest gene 126821 bp away)	5.1319e-06
chr11	91959086	-0.196981	0.0274618	2.29489e-10	0.825339	FAT3	Intergenic (nearest gene 126175 bp away)	5.14004e-06
chr19	33819832	0.196321	0.0275161	2.73336e-10	0.0202033	CEBPA-AS1	Intergenic (nearest gene 23869 bp away)	5.967e-06
chr19	33819854	0.1963	0.0275178	2.74851e-10	0.0203258	CEBPA-AS1	Intergenic (nearest gene 23891 bp away)	5.967e-06
chr19	33819897	0.19625	0.0275219	2.78553e-10	0.0205691	CEBPA-AS1	Intergenic (nearest gene 23934 bp away)	5.967e-06
chr19	33819901	0.196244	0.0275224	2.78948e-10	0.020592	CEBPA-AS1	Intergenic (nearest gene 23938 bp away)	5.967e-06
chr11	91958403	-0.196166	0.0275288	2.84756e-10	0.867479	FAT3	Intergenic (nearest gene 126858 bp away)	6.02354e-06
chr11	91958396	-0.19599	0.0275432	2.98308e-10	0.868173	FAT3	Intergenic (nearest gene 126865 bp away)	6.18966e-06
chr11	91958394	-0.195938	0.0275474	3.0236e-10	0.868372	FAT3	Intergenic (nearest gene 126867 bp away)	6.18966e-06
chr17	30846490	-0.195917	0.0275492	3.04063e-10	0.884602	MYO1D	Intron	6.18966e-06
chr11	91959123	-0.195898	0.0275508	3.05613e-10	0.826065	FAT3	Intergenic (nearest gene 126138 bp away)	6.18966e-06
chr11	91959125	-0.195834	0.027556	3.10772e-10	0.826113	FAT3	Intergenic (nearest gene 126136 bp away)	6.22788e-06
chr11	91958385	-0.195703	0.0275667	3.21648e-10	0.869267	FAT3	Intergenic (nearest gene 126876 bp away)	6.3787e-06
chr17	30846493	-0.195584	0.0275763	3.31807e-10	0.884783	MYO1D	Intron	6.51233e-06
chr17	30846496	-0.195249	0.0276037	3.62257e-10	0.884963	MYO1D	Intron	7.03741e-06
chr11	91959149	-0.195031	0.0276213	3.83414e-10	0.826748	FAT3	Intergenic (nearest gene 126112 bp away)	7.37318e-06
chr11	91958359	-0.194982	0.0276253	3.88348e-10	0.871872	FAT3	Intergenic (nearest gene 126902 bp away)	7.39339e-06
chr17	30846499	-0.19491	0.0276312	3.95681e-10	0.885142	MYO1D	Intron	7.4584e-06
chr11	91959164	-0.194495	0.0276648	4.40691e-10	0.827194	FAT3	Intergenic (nearest gene 126097 bp away)	8.22538e-06
chr17	30846505	-0.194224	0.0276866	4.72666e-10	0.885495	MYO1D	Intron	8.73655e-06
chr11	91959175	-0.194087	0.0276977	4.89719e-10	0.827542	FAT3	Intergenic (nearest gene 126086 bp away)	8.9647e-06
chr11	91958324	-0.193917	0.0277113	5.11544e-10	0.875409	FAT3	Intergenic (nearest gene 126937 bp away)	9.27504e-06
chr11	91959181	-0.193859	0.027716	5.19259e-10	0.827739	FAT3	Intergenic (nearest gene 126080 bp away)	9.3261e-06
chr11	91958317	-0.193692	0.0277294	5.42041e-10	0.876119	FAT3	Intergenic (nearest gene 126944 bp away)	9.6443e-06
chr11	91958309	-0.19343	0.0277504	5.79746e-10	0.876932	FAT3	Intergenic (nearest gene 126952 bp away)	1.02196e-05
chr11	91958304	-0.193263	0.0277638	6.04969e-10	0.877441	FAT3	Intergenic (nearest gene 126957 bp away)	1.05665e-05
chr17	30846514	-0.193174	0.0277709	6.18888e-10	0.886016	MYO1D	Intron	1.06556e-05
chr11	91959199	-0.193159	0.0277721	6.21269e-10	0.828353	FAT3	Intergenic (nearest gene 126062 bp away)	1.06556e-05
chr11	91958295	-0.192959	0.0277881	6.53852e-10	0.878357	FAT3	Intergenic (nearest gene 126966 bp away)	1.11143e-05
chr10	1102503	-0.192811	0.0277999	6.78942e-10	0.864289	IDI1	3_UTR	1.14387e-05
chr10	1102516	-0.192655	0.0278124	7.06483e-10	0.864447	IDI1	3_UTR	1.17983e-05
chr10	1102523	-0.19257	0.0278191	7.21869e-10	0.864532	IDI1	3_UTR	1.19504e-05
chr17	30846520	-0.192462	0.0278277	7.41949e-10	0.886357	MYO1D	Intron	1.19973e-05
chr10	1102536	-0.192411	0.0278318	7.51521e-10	0.864688	IDI1	3_UTR	1.19973e-05
chr11	91958279	-0.192403	0.0278324	7.5307e-10	0.879987	FAT3	Intergenic (nearest gene 126982 bp away)	1.19973e-05
chr11	91959218	-0.192397	0.0278329	7.54213e-10	0.829035	FAT3	Intergenic (nearest gene 126043 bp away)	1.19973e-05
chr10	1102538	-0.192386	0.0278337	7.56211e-10	0.864712	IDI1	3_UTR	1.19973e-05
chr10	1102543	-0.192325	0.0278386	7.68089e-10	0.864773	IDI1	3_UTR	1.20671e-05
chr10	1102547	-0.192275	0.0278425	7.7775e-10	0.864821	IDI1	3_UTR	1.20671e-05
chr10	1102550	-0.192238	0.0278455	7.85091e-10	0.864857	IDI1	3_UTR	1.20671e-05
chr11	91959222	-0.192234	0.0278458	7.85966e-10	0.829182	FAT3	Intergenic (nearest gene 126039 bp away)	1.20671e-05
chr11	91959227	-0.192029	0.027862	8.27658e-10	0.829367	FAT3	Intergenic (nearest gene 126034 bp away)	1.26056e-05
chr17	30846524	-0.191981	0.0278659	8.37842e-10	0.886582	MYO1D	Intron	1.26594e-05
chr11	91959232	-0.191824	0.0278783	8.71662e-10	0.829554	FAT3	Intergenic (nearest gene 126029 bp away)	1.30667e-05
chr17	30846526	-0.191739	0.027885	8.90499e-10	0.886694	MYO1D	Intron	1.32448e-05
chr10	1102609	-0.191492	0.0279045	9.47386e-10	0.86556	IDI1	3_UTR	1.39642e-05
chr10	1102611	-0.191466	0.0279065	9.53536e-10	0.865584	IDI1	3_UTR	1.39642e-05
chr17	30846529	-0.191374	0.0279138	9.75955e-10	0.88686	MYO1D	Intron	1.41834e-05
chr10	1102624	-0.191298	0.0279198	9.94648e-10	0.865738	IDI1	3_UTR	1.43456e-05
chr10	1102632	-0.191194	0.027928	1.02096e-09	0.865832	IDI1	3_UTR	1.46143e-05
chr17	30846531	-0.191129	0.0279331	1.03757e-09	0.886971	MYO1D	Intron	1.46353e-05
chr10	1102637	-0.191128	0.0279332	1.0378e-09	0.865891	IDI1	3_UTR	1.46353e-05
chr10	1102644	-0.191036	0.0279404	1.06192e-09	0.865973	IDI1	3_UTR	1.48654e-05
chr17	30846535	-0.190637	0.0279718	1.17305e-09	0.88719	MYO1D	Intron	1.63011e-05
chr16	148351	0.189942	0.028026	1.39323e-09	0.053154	NPRL3	Intron	1.92206e-05
chr10	1102744	-0.189682	0.0280462	1.48526e-09	0.867132	WDR37	Intergenic (nearest gene 31 bp away)	2.03428e-05
chr11	91958205	-0.189617	0.0280513	1.50941e-09	0.887511	FAT3	Intergenic (nearest gene 127056 bp away)	2.05259e-05
chr10	1102758	-0.189487	0.0280614	1.55823e-09	0.867292	WDR37	Intergenic (nearest gene 17 bp away)	2.10394e-05
chr16	148385	0.189314	0.0280748	1.62593e-09	0.0539687	NPRL3	Intron	2.1799e-05
chr17	30846546	-0.189262	0.0280788	1.6467e-09	0.887781	MYO1D	Intron	2.19231e-05
chr10	1102780	-0.189178	0.0280853	1.68091e-09	0.867542	WDR37	5_UTR	2.21375e-05
chr10	1102782	-0.18915	0.0280875	1.69258e-09	0.867565	WDR37	5_UTR	2.21375e-05
chr11	91958193	-0.189138	0.0280885	1.6977e-09	0.888723	FAT3	Intergenic (nearest gene 127068 bp away)	2.21375e-05
chr11	91958191	-0.189057	0.0280947	1.73144e-09	0.888924	FAT3	Intergenic (nearest gene 127070 bp away)	2.23841e-05
chr10	1102790	-0.189037	0.0280963	1.74012e-09	0.867655	WDR37	5_UTR	2.23841e-05
chr17	30846549	-0.188883	0.0281082	1.80693e-09	0.88794	MYO1D	Intron	2.30875e-05
chr11	91958181	-0.188652	0.0281259	1.91115e-09	0.889931	FAT3	Intergenic (nearest gene 127080 bp away)	2.42564e-05
chr10	1102827	-0.188508	0.0281371	1.97955e-09	0.868071	WDR37	5_UTR	2.49581e-05
chr10	1102835	-0.188393	0.028146	2.03584e-09	0.86816	WDR37	5_UTR	2.52066e-05
chr11	91958174	-0.188367	0.0281479	2.04855e-09	0.890634	FAT3	Intergenic (nearest gene 127087 bp away)	2.52066e-05
chr10	1102837	-0.188364	0.0281482	2.05018e-09	0.868182	WDR37	5_UTR	2.52066e-05
chr10	1102840	-0.18832	0.0281515	2.07189e-09	0.868216	WDR37	5_UTR	2.52066e-05
chr7	99156851	-0.188233	0.0281582	2.11593e-09	0.848654	ZNF655	Intron	2.52066e-05
chr7	99156868	-0.188233	0.0281582	2.11606e-09	0.848312	ZNF655	Intron	2.52066e-05
chr7	99156836	-0.188224	0.0281589	2.12066e-09	0.848953	ZNF655	Intron	2.52066e-05
chr7	99156831	-0.188219	0.0281593	2.12323e-09	0.849051	ZNF655	Intron	2.52066e-05
chr16	148419	0.188204	0.0281604	2.13101e-09	0.0549543	NPRL3	Intron	2.52066e-05
chr11	91958170	-0.188203	0.0281605	2.13166e-09	0.891035	FAT3	Intergenic (nearest gene 127091 bp away)	2.52066e-05
chr7	99156782	-0.188121	0.0281669	2.17455e-09	0.850003	ZNF655	Intron	2.54599e-05
chr10	1102856	-0.188088	0.0281694	2.19188e-09	0.868394	WDR37	5_UTR	2.54599e-05
chr7	99156762	-0.188055	0.0281719	2.20916e-09	0.850382	ZNF655	Intron	2.54599e-05
chr10	1102861	-0.188015	0.028175	2.23088e-09	0.868449	WDR37	5_UTR	2.54599e-05
chr11	91958165	-0.187997	0.0281763	2.24049e-09	0.891535	FAT3	Intergenic (nearest gene 127096 bp away)	2.54599e-05
chr7	99156745	-0.187989	0.028177	2.24492e-09	0.8507	ZNF655	Intron	2.54599e-05
chr10	1102863	-0.187986	0.0281772	2.24669e-09	0.868471	WDR37	5_UTR	2.54599e-05
chr11	91958162	-0.187873	0.0281858	2.30853e-09	0.891835	FAT3	Intergenic (nearest gene 127099 bp away)	2.60059e-05
chr7	99156712	-0.187832	0.028189	2.33153e-09	0.851308	ZNF655	Intron	2.60583e-05
chr7	99156709	-0.187816	0.0281902	2.34056e-09	0.851362	ZNF655	Intron	2.60583e-05
chr10	1102879	-0.187751	0.0281952	2.3775e-09	0.868648	WDR37	5_UTR	2.61384e-05
chr11	91958159	-0.187749	0.0281953	2.3787e-09	0.892135	FAT3	Intergenic (nearest gene 127102 bp away)	2.61384e-05
chr17	30846558	-0.187732	0.0281967	2.38895e-09	0.888408	MYO1D	Intron	2.61384e-05
chr11	91958156	-0.187625	0.0282048	2.45107e-09	0.892434	FAT3	Intergenic (nearest gene 127105 bp away)	2.65515e-05
chr10	1102888	-0.187619	0.0282053	2.45459e-09	0.868746	WDR37	5_UTR	2.65515e-05
chr10	1102892	-0.18756	0.0282098	2.4897e-09	0.86879	WDR37	5_UTR	2.67791e-05
chr11	91958153	-0.1875	0.0282144	2.52569e-09	0.892733	FAT3	Intergenic (nearest gene 127108 bp away)	2.70136e-05
chr11	91958150	-0.187376	0.0282239	2.60264e-09	0.893032	FAT3	Intergenic (nearest gene 127111 bp away)	2.76811e-05
chr7	99156634	-0.187326	0.0282277	2.63396e-09	0.852689	ZNF655	5_UTR	2.78586e-05
chr11	91958147	-0.18725	0.0282334	2.68197e-09	0.89333	FAT3	Intergenic (nearest gene 127114 bp away)	2.79497e-05
chr7	99156622	-0.187232	0.0282348	2.69389e-09	0.852895	ZNF655	5_UTR	2.79497e-05
chr17	30846562	-0.187214	0.0282362	2.70526e-09	0.888613	MYO1D	Intron	2.79497e-05
chr7	99156618	-0.1872	0.0282373	2.71473e-09	0.852964	ZNF655	5_UTR	2.79497e-05
chr10	1102917	-0.18719	0.0282381	2.72146e-09	0.869063	WDR37	Intron	2.79497e-05
chr7	99156615	-0.187175	0.0282391	2.73066e-09	0.853015	ZNF655	5_UTR	2.79497e-05
chr7	99156605	-0.187092	0.0282455	2.78558e-09	0.853185	ZNF655	5_UTR	2.83593e-05
chr7	99156602	-0.187067	0.0282474	2.80261e-09	0.853235	ZNF655	5_UTR	2.8381e-05
chr11	91959355	-0.187029	0.0282503	2.82795e-09	0.834193	FAT3	Intergenic (nearest gene 125906 bp away)	2.8486e-05
chr7	99156593	-0.186989	0.0282533	2.85531e-09	0.853387	ZNF655	5_UTR	2.85152e-05
chr17	30846564	-0.186955	0.028256	2.87892e-09	0.888715	MYO1D	Intron	2.85152e-05
chr7	99156588	-0.186945	0.0282567	2.88564e-09	0.85347	ZNF655	5_UTR	2.85152e-05
chr7	99156586	-0.186927	0.0282581	2.89799e-09	0.853504	ZNF655	5_UTR	2.85152e-05
chr11	91958139	-0.186916	0.0282589	2.90573e-09	0.894123	FAT3	Intergenic (nearest gene 127122 bp away)	2.85152e-05
chr10	1102939	-0.186861	0.0282631	2.94411e-09	0.869302	WDR37	Intron	2.86207e-05
chr10	1102942	-0.186816	0.0282665	2.97592e-09	0.869334	WDR37	Intron	2.86207e-05
chr11	91960201	-0.186762	0.0282706	3.01447e-09	0.849399	FAT3	Intergenic (nearest gene 125060 bp away)	2.86207e-05
chr11	91960177	-0.186754	0.0282712	3.02022e-09	0.849333	FAT3	Intergenic (nearest gene 125084 bp away)	2.86207e-05
chr11	91960218	-0.186751	0.0282714	3.02241e-09	0.849421	FAT3	Intergenic (nearest gene 125043 bp away)	2.86207e-05
chr10	1102947	-0.186741	0.0282722	3.02972e-09	0.869388	WDR37	Intron	2.86207e-05
chr11	91960248	-0.186693	0.0282758	3.06452e-09	0.849408	FAT3	Intergenic (nearest gene 125013 bp away)	2.86207e-05
chr11	91960251	-0.186684	0.0282765	3.07085e-09	0.849403	FAT3	Intergenic (nearest gene 125010 bp away)	2.86207e-05
chr11	91960253	-0.186678	0.0282769	3.0753e-09	0.849399	FAT3	Intergenic (nearest gene 125008 bp away)	2.86207e-05
chr11	91958133	-0.186664	0.028278	3.08585e-09	0.894717	FAT3	Intergenic (nearest gene 127128 bp away)	2.86207e-05
chr11	91960261	-0.186652	0.028279	3.09494e-09	0.849382	FAT3	Intergenic (nearest gene 125000 bp away)	2.86207e-05
chr10	1102954	-0.186636	0.0282802	3.10676e-09	0.869463	WDR37	Intron	2.86207e-05
chr11	91959368	-0.186619	0.0282814	3.11919e-09	0.834642	FAT3	Intergenic (nearest gene 125893 bp away)	2.86207e-05
chr11	91960272	-0.186609	0.0282822	3.12695e-09	0.84935	FAT3	Intergenic (nearest gene 124989 bp away)	2.86207e-05
chr7	99156545	-0.186538	0.0282876	3.17972e-09	0.854178	ZNF655	5_UTR	2.89084e-05
chr11	91960289	-0.186526	0.0282885	3.18875e-09	0.849282	FAT3	Intergenic (nearest gene 124972 bp away)	2.89084e-05
chr7	99156539	-0.186478	0.0282921	3.22582e-09	0.854275	ZNF655	5_UTR	2.91058e-05
chr11	91958119	-0.186074	0.0283227	3.55085e-09	0.896095	FAT3	Intergenic (nearest gene 127142 bp away)	3.18874e-05
chr7	99156492	-0.185974	0.0283302	3.6355e-09	0.855023	ZNF655	5_UTR	3.24943e-05
chr7	99156488	-0.185929	0.0283336	3.67466e-09	0.855085	ZNF655	5_UTR	3.26908e-05
chr7	99156485	-0.185895	0.0283362	3.70451e-09	0.855132	ZNF655	5_UTR	3.27778e-05
chr11	91959395	-0.185874	0.0283378	3.72249e-09	0.835515	FAT3	Intergenic (nearest gene 125866 bp away)	3.27778e-05
chr16	148457	0.185859	0.0283389	3.73609e-09	0.0563212	NPRL3	Intron	3.27778e-05
chr17	30846573	-0.185776	0.0283452	3.80991e-09	0.889167	MYO1D	Intron	3.32721e-05
chr7	99156469	-0.185709	0.0283502	3.87082e-09	0.85538	ZNF655	5_UTR	3.36497e-05
chr11	91959416	-0.185409	0.0283728	4.15451e-09	0.836132	FAT3	Intergenic (nearest gene 125845 bp away)	3.44318e-05
chr7	99156443	-0.185395	0.0283738	4.16833e-09	0.855777	ZNF655	Intron	3.44318e-05
chr11	91960408	-0.185351	0.0283771	4.21122e-09	0.848194	FAT3	Intergenic (nearest gene 124853 bp away)	3.44318e-05
chr7	99156438	-0.185333	0.0283785	4.22969e-09	0.855852	ZNF655	Intron	3.44318e-05
chr11	91960411	-0.185306	0.0283805	4.25584e-09	0.848153	FAT3	Intergenic (nearest gene 124850 bp away)	3.44318e-05
chr11	91958099	-0.185225	0.0283866	4.33767e-09	0.898048	FAT3	Intergenic (nearest gene 127162 bp away)	3.44318e-05
chr7	99156427	-0.185194	0.0283889	4.36966e-09	0.856017	ZNF655	Intron	3.44318e-05
chr7	99156420	-0.185105	0.0283956	4.46244e-09	0.856122	ZNF655	Intron	3.44318e-05
chr16	148466	0.185031	0.0284012	4.54053e-09	0.0566947	NPRL3	Intron	3.44318e-05
chr18	29265285	-0.185024	0.0284016	4.54722e-09	0.901285	B4GALT6	Intergenic (nearest gene 599 bp away)	3.44318e-05
chr18	29265300	-0.18502	0.0284019	4.55159e-09	0.900911	B4GALT6	Intergenic (nearest gene 614 bp away)	3.44318e-05
chr11	91960429	-0.18502	0.0284019	4.5517e-09	0.847888	FAT3	Intergenic (nearest gene 124832 bp away)	3.44318e-05
chr18	29265304	-0.185016	0.0284022	4.5558e-09	0.900811	B4GALT6	Intergenic (nearest gene 618 bp away)	3.44318e-05
chr18	29265307	-0.185013	0.0284025	4.55979e-09	0.900736	B4GALT6	Intergenic (nearest gene 621 bp away)	3.44318e-05
chr18	29265310	-0.185008	0.0284028	4.56447e-09	0.900661	B4GALT6	Intergenic (nearest gene 624 bp away)	3.44318e-05
chr18	29265316	-0.184998	0.0284036	4.57593e-09	0.900512	B4GALT6	Intergenic (nearest gene 630 bp away)	3.44318e-05
chr18	29265318	-0.184993	0.0284039	4.58036e-09	0.900462	B4GALT6	Intergenic (nearest gene 632 bp away)	3.44318e-05
chr19	35263649	-0.184993	0.028404	4.58129e-09	0.899318	ZNF599	Intron	3.44318e-05
chr17	30846579	-0.184982	0.0284048	4.59278e-09	0.889462	MYO1D	Intron	3.44318e-05
chr7	99156409	-0.184962	0.0284063	4.6143e-09	0.856285	ZNF655	Exonic_Splice.5_UTR	3.44318e-05
chr18	29265338	-0.184937	0.0284082	4.64131e-09	0.899965	B4GALT6	Intergenic (nearest gene 652 bp away)	3.44318e-05
chr18	29265342	-0.184922	0.0284092	4.65709e-09	0.899866	B4GALT6	Intergenic (nearest gene 656 bp away)	3.44318e-05
chr11	91960435	-0.184918	0.0284096	4.66195e-09	0.847794	FAT3	Intergenic (nearest gene 124826 bp away)	3.44318e-05
chr19	35263656	-0.184915	0.0284098	4.66474e-09	0.89903	ZNF599	Intron	3.44318e-05
chr11	91959839	-0.184907	0.0284104	4.67437e-09	0.8448	FAT3	Intergenic (nearest gene 125422 bp away)	3.44318e-05
chr19	35263659	-0.184882	0.0284123	4.70145e-09	0.898907	ZNF599	Intron	3.44318e-05
chr18	29265352	-0.184882	0.0284123	4.7018e-09	0.89962	B4GALT6	Intergenic (nearest gene 666 bp away)	3.44318e-05
chr18	29265361	-0.184839	0.0284155	4.74848e-09	0.899399	B4GALT6	Intergenic (nearest gene 675 bp away)	3.44318e-05
chr18	29265363	-0.184829	0.0284162	4.7597e-09	0.89935	B4GALT6	Intergenic (nearest gene 677 bp away)	3.44318e-05
chr7	99156397	-0.184803	0.0284182	4.78882e-09	0.856462	ZNF655	5_UTR	3.44318e-05
chr11	91959816	-0.18477	0.0284207	4.82648e-09	0.84435	FAT3	Intergenic (nearest gene 125445 bp away)	3.44318e-05
chr18	29265374	-0.184769	0.0284207	4.82728e-09	0.899084	B4GALT6	Intergenic (nearest gene 688 bp away)	3.44318e-05
chr19	35263669	-0.184768	0.0284208	4.82812e-09	0.898492	ZNF599	Intron	3.44318e-05
chr18	29265380	-0.184733	0.0284234	4.86842e-09	0.89894	B4GALT6	Intergenic (nearest gene 694 bp away)	3.44318e-05
chr11	91959464	-0.184728	0.0284238	4.87428e-09	0.837313	FAT3	Intergenic (nearest gene 125797 bp away)	3.44318e-05
chr11	91959807	-0.18472	0.0284244	4.88279e-09	0.844172	FAT3	Intergenic (nearest gene 125454 bp away)	3.44318e-05
chr18	29265383	-0.184714	0.0284249	4.89016e-09	0.898869	B4GALT6	Intergenic (nearest gene 697 bp away)	3.44318e-05
chr18	29265202	-0.184708	0.0284253	4.89666e-09	0.903307	B4GALT6	Intergenic (nearest gene 516 bp away)	3.44318e-05
chr18	29265198	-0.184677	0.0284276	4.93227e-09	0.9034	B4GALT6	Intergenic (nearest gene 512 bp away)	3.44318e-05
chr18	29265389	-0.184673	0.0284279	4.93639e-09	0.898727	B4GALT6	Intergenic (nearest gene 703 bp away)	3.44318e-05
chr7	99156387	-0.184669	0.0284282	4.94166e-09	0.856608	ZNF655	5_UTR	3.44318e-05
chr11	91959796	-0.184663	0.0284287	4.94878e-09	0.843953	FAT3	Intergenic (nearest gene 125465 bp away)	3.44318e-05
chr18	29265196	-0.184661	0.0284288	4.95084e-09	0.903447	B4GALT6	Intergenic (nearest gene 510 bp away)	3.44318e-05
chr18	29265194	-0.184644	0.02843	4.96992e-09	0.903493	B4GALT6	Intergenic (nearest gene 508 bp away)	3.44318e-05
chr18	29265394	-0.184638	0.0284305	4.97799e-09	0.89861	B4GALT6	Intergenic (nearest gene 708 bp away)	3.44318e-05
chr18	29265191	-0.184619	0.0284319	4.99951e-09	0.903563	B4GALT6	Intergenic (nearest gene 505 bp away)	3.44318e-05
chr11	91959785	-0.184609	0.0284327	5.01136e-09	0.843733	FAT3	Intergenic (nearest gene 125476 bp away)	3.44318e-05
chr19	35263683	-0.184604	0.0284331	5.01723e-09	0.897906	ZNF599	Intron	3.44318e-05
chr11	91959779	-0.184581	0.0284347	5.04394e-09	0.843613	FAT3	Intergenic (nearest gene 125482 bp away)	3.44318e-05
chr11	91959776	-0.184568	0.0284358	5.05981e-09	0.843553	FAT3	Intergenic (nearest gene 125485 bp away)	3.44318e-05
chr19	35263687	-0.184556	0.0284366	5.07393e-09	0.897737	ZNF599	Intron	3.44318e-05
chr18	29265405	-0.184551	0.028437	5.07984e-09	0.898356	B4GALT6	Intergenic (nearest gene 719 bp away)	3.44318e-05
chr18	29265182	-0.184538	0.028438	5.0955e-09	0.903769	B4GALT6	Intergenic (nearest gene 496 bp away)	3.44318e-05
chr18	29265407	-0.184534	0.0284383	5.09994e-09	0.898311	B4GALT6	Intergenic (nearest gene 721 bp away)	3.44318e-05
chr11	91959767	-0.184529	0.0284386	5.10561e-09	0.843372	FAT3	Intergenic (nearest gene 125494 bp away)	3.44318e-05
chr18	29265412	-0.18449	0.0284416	5.15245e-09	0.898198	B4GALT6	Intergenic (nearest gene 726 bp away)	3.44318e-05
chr18	29265176	-0.184479	0.0284424	5.16574e-09	0.903906	B4GALT6	Intergenic (nearest gene 490 bp away)	3.44318e-05
chr18	29265414	-0.184472	0.0284429	5.17437e-09	0.898153	B4GALT6	Intergenic (nearest gene 728 bp away)	3.44318e-05
chr11	91959750	-0.184463	0.0284435	5.18441e-09	0.843028	FAT3	Intergenic (nearest gene 125511 bp away)	3.44318e-05
chr19	35263695	-0.184458	0.0284439	5.19112e-09	0.897398	ZNF599	Intron	3.44318e-05
chr18	29265416	-0.184453	0.0284443	5.19682e-09	0.898108	B4GALT6	Intergenic (nearest gene 730 bp away)	3.44318e-05
chr18	29265420	-0.184415	0.0284472	5.24339e-09	0.898019	B4GALT6	Intergenic (nearest gene 734 bp away)	3.44318e-05
chr18	29265168	-0.184395	0.0284486	5.26755e-09	0.904085	B4GALT6	Intergenic (nearest gene 482 bp away)	3.44318e-05
chr19	35263701	-0.184383	0.0284495	5.28244e-09	0.897142	ZNF599	Intron	3.44318e-05
chr11	91959724	-0.184379	0.0284498	5.2869e-09	0.8425	FAT3	Intergenic (nearest gene 125537 bp away)	3.44318e-05
chr18	29265424	-0.184375	0.0284501	5.29218e-09	0.897931	B4GALT6	Intergenic (nearest gene 738 bp away)	3.44318e-05
chr19	35263703	-0.184358	0.0284514	5.31356e-09	0.897056	ZNF599	Intron	3.44318e-05
chr7	99156364	-0.184352	0.0284518	5.32062e-09	0.85694	ZNF655	5_UTR	3.44318e-05
chr19	35263705	-0.184332	0.0284533	5.34502e-09	0.89697	ZNF599	Intron	3.44318e-05
chr11	91958078	-0.184332	0.0284533	5.34593e-09	0.900076	FAT3	Intergenic (nearest gene 127183 bp away)	3.44318e-05
chr7	99156362	-0.184324	0.0284539	5.35548e-09	0.856969	ZNF655	5_UTR	3.44318e-05
chr11	91959700	-0.184319	0.0284543	5.36122e-09	0.842011	FAT3	Intergenic (nearest gene 125561 bp away)	3.44318e-05
chr18	29265431	-0.184302	0.0284555	5.38267e-09	0.897778	B4GALT6	Intergenic (nearest gene 745 bp away)	3.44318e-05
chr11	91959681	-0.184284	0.0284569	5.40501e-09	0.841624	FAT3	Intergenic (nearest gene 125580 bp away)	3.44318e-05
chr7	99156358	-0.184268	0.0284581	5.42615e-09	0.857026	ZNF655	5_UTR	3.44318e-05
chr11	91959570	-0.184267	0.0284581	5.42657e-09	0.839394	FAT3	Intergenic (nearest gene 125691 bp away)	3.44318e-05
chr11	91959580	-0.184255	0.028459	5.44185e-09	0.839589	FAT3	Intergenic (nearest gene 125681 bp away)	3.44318e-05
chr11	91959655	-0.184252	0.0284593	5.44629e-09	0.841094	FAT3	Intergenic (nearest gene 125606 bp away)	3.44318e-05
chr11	91959586	-0.184249	0.0284595	5.44933e-09	0.839708	FAT3	Intergenic (nearest gene 125675 bp away)	3.44318e-05
chr19	35263712	-0.184243	0.02846	5.45794e-09	0.896668	ZNF599	Intron	3.44318e-05
chr11	91959642	-0.184242	0.02846	5.45907e-09	0.84083	FAT3	Intergenic (nearest gene 125619 bp away)	3.44318e-05
chr11	91959628	-0.184236	0.0284605	5.46665e-09	0.840547	FAT3	Intergenic (nearest gene 125633 bp away)	3.44318e-05
chr11	91959615	-0.184235	0.0284606	5.46779e-09	0.840285	FAT3	Intergenic (nearest gene 125646 bp away)	3.44318e-05
chr18	29265438	-0.184225	0.0284613	5.48e-09	0.897629	B4GALT6	Intergenic (nearest gene 752 bp away)	3.44318e-05
chr18	29265441	-0.184191	0.0284638	5.52394e-09	0.897565	B4GALT6	Intergenic (nearest gene 755 bp away)	3.45937e-05
chr18	29265149	-0.184169	0.0284654	5.55144e-09	0.904501	B4GALT6	Intergenic (nearest gene 463 bp away)	3.4652e-05
chr18	29265446	-0.184132	0.0284682	5.6003e-09	0.897461	B4GALT6	Intergenic (nearest gene 760 bp away)	3.47417e-05
chr18	29265146	-0.18413	0.0284683	5.60231e-09	0.904565	B4GALT6	Intergenic (nearest gene 460 bp away)	3.47417e-05
chr18	29265449	-0.184095	0.0284709	5.64809e-09	0.897399	B4GALT6	Intergenic (nearest gene 763 bp away)	3.48066e-05
chr6	99048153	0.184094	0.028471	5.64934e-09	0.0450724	PNKY	Intergenic (nearest gene 229863 bp away)	3.48066e-05
chr18	29265142	-0.184076	0.0284723	5.67289e-09	0.90465	B4GALT6	Intergenic (nearest gene 456 bp away)	3.48389e-05
chr17	30846586	-0.184047	0.0284745	5.71134e-09	0.889801	MYO1D	Intron	3.49623e-05
chr6	99048169	0.184028	0.028476	5.73724e-09	0.0450844	PNKY	Intergenic (nearest gene 229847 bp away)	3.50083e-05
chr18	29265456	-0.184006	0.0284775	5.76567e-09	0.897256	B4GALT6	Intergenic (nearest gene 770 bp away)	3.50694e-05
chr19	35263732	-0.183976	0.0284798	5.80613e-09	0.895796	ZNF599	Coding_region	3.5169e-05
chr7	99156337	-0.183967	0.0284805	5.819e-09	0.857323	ZNF655	5_UTR	3.5169e-05
chr6	99048189	0.183944	0.0284821	5.84905e-09	0.0450995	PNKY	Intergenic (nearest gene 229827 bp away)	3.52045e-05
chr19	35263735	-0.183935	0.0284828	5.86185e-09	0.895664	ZNF599	Coding_region	3.52045e-05
chr19	35263738	-0.183894	0.0284859	5.91854e-09	0.895532	ZNF599	Coding_region	3.54331e-05
chr19	35263741	-0.183852	0.028489	5.97622e-09	0.895399	ZNF599	Coding_region	3.56663e-05
chr6	99048220	0.183815	0.0284917	6.02672e-09	0.045123	PNKY	Intergenic (nearest gene 229796 bp away)	3.58553e-05
chr18	29265476	-0.183724	0.0284985	6.15504e-09	0.896865	B4GALT6	Intergenic (nearest gene 790 bp away)	3.65047e-05
chr11	91958063	-0.183693	0.0285008	6.19947e-09	0.901508	FAT3	Intergenic (nearest gene 127198 bp away)	3.66539e-05
chr18	29265115	-0.183665	0.0285028	6.23948e-09	0.905201	B4GALT6	Intergenic (nearest gene 429 bp away)	3.67763e-05
chr18	29265485	-0.183582	0.028509	6.36056e-09	0.896696	B4GALT6	Intergenic (nearest gene 799 bp away)	3.72803e-05
chr18	29265110	-0.18358	0.0285092	6.36414e-09	0.905298	B4GALT6	Intergenic (nearest gene 424 bp away)	3.72803e-05
chr18	29265487	-0.183549	0.0285114	6.40917e-09	0.896659	B4GALT6	Intergenic (nearest gene 801 bp away)	3.74289e-05
chr18	29265107	-0.183527	0.0285131	6.44272e-09	0.905356	B4GALT6	Intergenic (nearest gene 421 bp away)	3.75097e-05
chr18	29265491	-0.183482	0.0285164	6.50984e-09	0.896586	B4GALT6	Intergenic (nearest gene 805 bp away)	3.77849e-05
chr19	35263770	-0.183429	0.0285203	6.58903e-09	0.894097	ZNF599	5_UTR	3.81284e-05
chr19	35263779	-0.183291	0.0285305	6.80166e-09	0.893686	ZNF599	5_UTR	3.92395e-05
chr7	99156289	-0.183247	0.0285338	6.87171e-09	0.857988	ZNF655	5_UTR	3.93541e-05
chr19	35263782	-0.183245	0.0285339	6.87514e-09	0.893548	ZNF599	5_UTR	3.93541e-05
chr17	30846592	-0.18324	0.0285343	6.88354e-09	0.890087	MYO1D	Intron	3.93541e-05
chr7	99156286	-0.183201	0.0285372	6.94552e-09	0.858028	ZNF655	5_UTR	3.95895e-05
chr7	99156283	-0.183154	0.0285406	7.02036e-09	0.858069	ZNF655	5_UTR	3.98967e-05
chr19	35263791	-0.183103	0.0285444	7.10378e-09	0.893133	ZNF599	5_UTR	4.01519e-05
chr18	29265084	-0.1831	0.0285446	7.10745e-09	0.905762	B4GALT6	Intergenic (nearest gene 398 bp away)	4.01519e-05
chr18	29265082	-0.183062	0.0285474	7.17009e-09	0.905794	B4GALT6	Intergenic (nearest gene 396 bp away)	4.0386e-05
chr18	29265079	-0.183005	0.0285516	7.26553e-09	0.905842	B4GALT6	Intergenic (nearest gene 393 bp away)	4.08028e-05
chr18	29265517	-0.182986	0.028553	7.29602e-09	0.896139	B4GALT6	Intergenic (nearest gene 831 bp away)	4.08535e-05
chr11	91958046	-0.182971	0.0285541	7.32137e-09	0.903116	FAT3	Intergenic (nearest gene 127215 bp away)	4.08752e-05
chr18	29265519	-0.182944	0.0285561	7.36762e-09	0.896107	B4GALT6	Intergenic (nearest gene 833 bp away)	4.10119e-05
chr18	29265075	-0.182927	0.0285573	7.39551e-09	0.905904	B4GALT6	Intergenic (nearest gene 389 bp away)	4.10119e-05
chr7	99156268	-0.182919	0.028558	7.41047e-09	0.858271	ZNF655	5_UTR	4.10119e-05
chr18	29265073	-0.182888	0.0285602	7.46168e-09	0.905934	B4GALT6	Intergenic (nearest gene 387 bp away)	4.11756e-05
chr18	29265068	-0.182791	0.0285674	7.63054e-09	0.906007	B4GALT6	Intergenic (nearest gene 382 bp away)	4.19857e-05
chr18	29265065	-0.182732	0.0285717	7.73422e-09	0.906049	B4GALT6	Intergenic (nearest gene 379 bp away)	4.24336e-05
chr17	30846596	-0.182698	0.0285742	7.79487e-09	0.890275	MYO1D	Intron	4.26434e-05
chr10	1103214	-0.182598	0.0285815	7.9749e-09	0.872139	WDR37	Intron	4.33322e-05
chr18	29265058	-0.182594	0.0285819	7.98309e-09	0.906143	B4GALT6	Intergenic (nearest gene 372 bp away)	4.33322e-05
chr11	91958037	-0.18259	0.0285821	7.98905e-09	0.903959	FAT3	Intergenic (nearest gene 127224 bp away)	4.33322e-05
chr7	99156246	-0.182566	0.0285839	8.03399e-09	0.858564	ZNF655	5_UTR	4.34521e-05
chr18	29265055	-0.182534	0.0285863	8.09274e-09	0.906182	B4GALT6	Intergenic (nearest gene 369 bp away)	4.36459e-05
chr10	1103219	-0.182518	0.0285874	8.12121e-09	0.872188	WDR37	Intron	4.36743e-05
chr18	29265538	-0.182504	0.0285885	8.149e-09	0.895811	B4GALT6	Intergenic (nearest gene 852 bp away)	4.36743e-05
chr18	29265053	-0.182494	0.0285892	8.16684e-09	0.906207	B4GALT6	Intergenic (nearest gene 367 bp away)	4.36743e-05
chr18	29265540	-0.182453	0.0285922	8.24334e-09	0.895782	B4GALT6	Intergenic (nearest gene 854 bp away)	4.39599e-05
chr18	29265544	-0.18235	0.0285998	8.44005e-09	0.895724	B4GALT6	Intergenic (nearest gene 858 bp away)	4.48833e-05
chr10	1103234	-0.18228	0.0286049	8.57626e-09	0.872334	WDR37	Intron	4.54535e-05
chr18	29265547	-0.18227	0.0286056	8.59503e-09	0.895681	B4GALT6	Intergenic (nearest gene 861 bp away)	4.54535e-05
chr7	99156227	-0.182254	0.0286068	8.62638e-09	0.858814	ZNF655	5_UTR	4.54929e-05
chr18	29265040	-0.182232	0.0286084	8.67029e-09	0.906356	B4GALT6	Intergenic (nearest gene 354 bp away)	4.55982e-05
chr11	91958027	-0.182168	0.028613	8.79627e-09	0.90489	FAT3	Intergenic (nearest gene 127234 bp away)	4.61332e-05
chr18	29265552	-0.182132	0.0286157	8.86849e-09	0.895612	B4GALT6	Intergenic (nearest gene 866 bp away)	4.63051e-05
chr18	29265035	-0.182128	0.028616	8.87768e-09	0.906407	B4GALT6	Intergenic (nearest gene 349 bp away)	4.63051e-05
chr11	91958024	-0.182042	0.0286223	9.05256e-09	0.905168	FAT3	Intergenic (nearest gene 127237 bp away)	4.70882e-05
chr10	1103251	-0.182008	0.0286248	9.1225e-09	0.872499	WDR37	Intron	4.73228e-05
chr18	29265026	-0.181936	0.02863	9.2732e-09	0.906488	B4GALT6	Intergenic (nearest gene 340 bp away)	4.77989e-05
chr7	99156208	-0.181936	0.02863	9.27396e-09	0.85906	ZNF655	5_UTR	4.77989e-05
chr10	1103256	-0.181928	0.0286306	9.2896e-09	0.872548	WDR37	Intron	4.77989e-05
chr17	30846602	-0.181881	0.0286341	9.39078e-09	0.890553	MYO1D	Intron	4.81892e-05
chr18	29265022	-0.181849	0.0286364	9.45855e-09	0.90652	B4GALT6	Intergenic (nearest gene 336 bp away)	4.84065e-05
chr7	99156195	-0.181714	0.0286462	9.75168e-09	0.859227	ZNF655	5_UTR	4.97729e-05
chr18	29265010	-0.18158	0.028656	1.00536e-08	0.906597	B4GALT6	Intergenic (nearest gene 324 bp away)	5.11765e-05
chr18	29265004	-0.18144	0.0286662	1.03756e-08	0.906626	B4GALT6	Intergenic (nearest gene 318 bp away)	5.26748e-05
chr7	99156176	-0.181385	0.0286702	1.05051e-08	0.859467	ZNF655	5_UTR	5.31905e-05
chr11	91958006	-0.181289	0.0286772	1.07373e-08	0.906823	FAT3	Intergenic (nearest gene 127255 bp away)	5.42218e-05
chrX	603506	0.181221	0.0286821	1.09011e-08	0.160069	SHOX	Intron	5.49034e-05
chr18	29264994	-0.181199	0.0286837	1.0955e-08	0.906658	B4GALT6	Intergenic (nearest gene 308 bp away)	5.50294e-05
chr7	99156163	-0.181157	0.0286868	1.10614e-08	0.85963	ZNF655	5_UTR	5.53557e-05
chr18	29264992	-0.18115	0.0286873	1.10781e-08	0.906662	B4GALT6	Intergenic (nearest gene 306 bp away)	5.53557e-05
chrX	604104	0.181112	0.02869	1.11742e-08	0.160058	SHOX	Intron	5.56805e-05
chr6	20875446	0.181101	0.0286908	1.12016e-08	0.0631401	CDKAL1	Intron	5.56805e-05
chr6	20875422	0.181087	0.0286918	1.12364e-08	0.0631124	CDKAL1	Intron	5.57081e-05
chr17	30846608	-0.181058	0.0286939	1.13095e-08	0.890828	MYO1D	Intron	5.58812e-05
chr7	99156157	-0.18105	0.0286945	1.133e-08	0.859705	ZNF655	5_UTR	5.58812e-05
chrX	604597	0.18101	0.0286974	1.14324e-08	0.160047	SHOX	Intron	5.61692e-05
chrX	604624	0.181004	0.0286978	1.14474e-08	0.160046	SHOX	Intron	5.61692e-05
chr18	29264984	-0.180946	0.0287021	1.15984e-08	0.906669	B4GALT6	Intergenic (nearest gene 298 bp away)	5.67636e-05
chr18	29264982	-0.180893	0.0287059	1.17361e-08	0.906669	B4GALT6	Intergenic (nearest gene 296 bp away)	5.72902e-05
chr18	29264980	-0.18084	0.0287097	1.18771e-08	0.906668	B4GALT6	Intergenic (nearest gene 294 bp away)	5.77933e-05
chr11	91957995	-0.180832	0.0287103	1.18999e-08	0.907822	FAT3	Intergenic (nearest gene 127266 bp away)	5.77933e-05
chr7	99156144	-0.180817	0.0287114	1.19395e-08	0.859866	ZNF655	5_UTR	5.78382e-05
chr11	91957992	-0.180708	0.0287193	1.22357e-08	0.908093	FAT3	Intergenic (nearest gene 127269 bp away)	5.90265e-05
chr18	29264975	-0.180704	0.0287196	1.22468e-08	0.906658	B4GALT6	Intergenic (nearest gene 289 bp away)	5.90265e-05
chr18	29264973	-0.180647	0.0287237	1.24026e-08	0.906652	B4GALT6	Intergenic (nearest gene 287 bp away)	5.94773e-05
chr18	29265595	-0.180647	0.0287237	1.24028e-08	0.895118	B4GALT6	Intergenic (nearest gene 909 bp away)	5.94773e-05
chr18	29264971	-0.18059	0.0287278	1.25632e-08	0.906644	B4GALT6	Intergenic (nearest gene 285 bp away)	6.00237e-05
chr11	91957989	-0.180584	0.0287282	1.25798e-08	0.908364	FAT3	Intergenic (nearest gene 127272 bp away)	6.00237e-05
chr7	99156126	-0.180489	0.0287351	1.28491e-08	0.860086	ZNF655	5_UTR	6.11555e-05
chr7	99156124	-0.180453	0.0287377	1.29552e-08	0.860111	ZNF655	5_UTR	6.12507e-05
chrX	606724	0.180448	0.0287381	1.29684e-08	0.15999	SHOX	3_UTR	6.12507e-05
chrX	606734	0.180445	0.0287383	1.29776e-08	0.15999	SHOX	3_UTR	6.12507e-05
chrX	606756	0.180438	0.0287388	1.29978e-08	0.159989	SHOX	3_UTR	6.12507e-05
chrX	606792	0.180426	0.0287396	1.30311e-08	0.159988	SHOX	3_UTR	6.12514e-05
chr7	99156122	-0.180416	0.0287404	1.30623e-08	0.860135	ZNF655	5_UTR	6.12514e-05
chr18	29264962	-0.180314	0.0287477	1.33626e-08	0.906587	B4GALT6	Intergenic (nearest gene 276 bp away)	6.25057e-05
chr18	29265604	-0.180253	0.0287521	1.35465e-08	0.895042	B4GALT6	Intergenic (nearest gene 918 bp away)	6.32106e-05
chr7	99156111	-0.180212	0.0287551	1.36705e-08	0.860268	ZNF655	5_UTR	6.36329e-05
chr11	91957979	-0.180173	0.0287579	1.37888e-08	0.90926	FAT3	Intergenic (nearest gene 127282 bp away)	6.40273e-05
chr18	29265606	-0.180161	0.0287588	1.38284e-08	0.895026	B4GALT6	Intergenic (nearest gene 920 bp away)	6.40549e-05
chr18	29264956	-0.180108	0.0287626	1.39917e-08	0.906531	B4GALT6	Intergenic (nearest gene 270 bp away)	6.46541e-05
chr7	99156103	-0.180063	0.0287658	1.41338e-08	0.860364	ZNF655	5_UTR	6.51524e-05
chr11	91957976	-0.180051	0.0287667	1.41705e-08	0.909527	FAT3	Intergenic (nearest gene 127285 bp away)	6.5164e-05
chr7	99156097	-0.17995	0.028774	1.44934e-08	0.860436	ZNF655	5_UTR	6.64883e-05
chr18	29265613	-0.179823	0.028783	1.49071e-08	0.894974	B4GALT6	Intergenic (nearest gene 927 bp away)	6.82215e-05
chr18	29265615	-0.179723	0.0287903	1.52441e-08	0.894959	B4GALT6	Intergenic (nearest gene 929 bp away)	6.95966e-05
chr7	99156084	-0.179703	0.0287917	1.53101e-08	0.86059	ZNF655	5_UTR	6.97309e-05
chr11	91957963	-0.179525	0.0288044	1.59259e-08	0.910677	FAT3	Intergenic (nearest gene 127298 bp away)	7.22413e-05
chr7	44349669	-0.179519	0.0288049	1.59479e-08	0.889906	CAMK2B	Intron	7.22413e-05
chr7	99156074	-0.179511	0.0288054	1.59752e-08	0.860708	ZNF655	5_UTR	7.22413e-05
chr7	44349663	-0.179271	0.0288226	1.68489e-08	0.889835	CAMK2B	Intron	7.60121e-05
chr7	44349656	-0.178962	0.0288447	1.80354e-08	0.889747	CAMK2B	Intron	8.11722e-05
chr7	44349652	-0.178777	0.0288578	1.87855e-08	0.889696	CAMK2B	Intron	8.43488e-05
chr18	29265635	-0.178603	0.0288703	1.95195e-08	0.894834	B4GALT6	Intergenic (nearest gene 949 bp away)	8.74383e-05
chr16	148510	0.178498	0.0288777	1.99741e-08	0.0588558	NPRL3	Intron	8.92164e-05
chr7	44349646	-0.178487	0.0288785	2.00194e-08	0.889615	CAMK2B	Intron	8.92164e-05
chr18	29265637	-0.178479	0.0288791	2.0057e-08	0.894824	B4GALT6	Intergenic (nearest gene 951 bp away)	8.92164e-05
chr17	30846627	-0.178421	0.0288832	2.03139e-08	0.891667	MYO1D	Intron	8.93458e-05
chr6	20891914	0.178409	0.028884	2.03666e-08	0.0657035	CDKAL1	Intron	8.93458e-05
chr6	20891926	0.178409	0.028884	2.03666e-08	0.0657041	CDKAL1	Intron	8.93458e-05
chr6	20891890	0.178409	0.028884	2.03668e-08	0.0657022	CDKAL1	Intron	8.93458e-05
chr6	20891868	0.178409	0.028884	2.03673e-08	0.0657011	CDKAL1	Intron	8.93458e-05
chr6	20891858	0.178409	0.028884	2.03677e-08	0.0657005	CDKAL1	Intron	8.93458e-05
chr7	44349644	-0.178388	0.0288855	2.04619e-08	0.889588	CAMK2B	Intron	8.95526e-05
chr7	44349642	-0.178286	0.0288927	2.09209e-08	0.88956	CAMK2B	Intron	9.13517e-05
chr18	29265642	-0.178159	0.0289017	2.15107e-08	0.894797	B4GALT6	Intergenic (nearest gene 956 bp away)	9.37121e-05
chr18	29265649	-0.177684	0.0289353	2.38587e-08	0.894763	B4GALT6	Intergenic (nearest gene 963 bp away)	0.000103704
chr17	30846635	-0.177297	0.0289626	2.59505e-08	0.892008	MYO1D	Intron	0.000112539
chr17	30846639	-0.176732	0.0290023	2.93176e-08	0.892176	MYO1D	Intron	0.000126852
chr7	44349614	-0.176704	0.0290043	2.94974e-08	0.889132	CAMK2B	Intron	0.000127341
chr7	44349608	-0.176325	0.0290307	3.19964e-08	0.889031	CAMK2B	Intron	0.000137817
chr17	30846643	-0.176165	0.0290419	3.31113e-08	0.892342	MYO1D	Intron	0.000142297
chr7	44349602	-0.175933	0.0290581	3.47979e-08	0.888927	CAMK2B	Intron	0.000149208
chr17	30846645	-0.175882	0.0290617	3.51842e-08	0.892424	MYO1D	Intron	0.000150525
chr16	148523	0.175488	0.029089	3.82625e-08	0.0596145	NPRL3	Intron	0.000163328
chr7	44349593	-0.17532	0.0291006	3.96561e-08	0.888764	CAMK2B	Intron	0.000168898
chr7	44349590	-0.175108	0.0291153	4.14738e-08	0.888708	CAMK2B	Intron	0.000176245
chr19	35264119	-0.175	0.0291228	4.24371e-08	0.875688	ZNF599	5_UTR	0.000179937
chr15	28439640	0.174852	0.029133	4.37877e-08	0.0662223	HERC2	Intron	0.000185252
chr15	28439621	0.174833	0.0291343	4.39595e-08	0.0661835	HERC2	Intron	0.000185296
chr15	28439608	0.17482	0.0291352	4.40865e-08	0.0661569	HERC2	Intron	0.000185296
chr15	28439598	0.174809	0.029136	4.41895e-08	0.0661365	HERC2	Intron	0.000185296
chr15	28439588	0.174797	0.0291368	4.42972e-08	0.0661161	HERC2	Intron	0.000185296
chr15	28439584	0.174792	0.0291371	4.43417e-08	0.0661079	HERC2	Intron	0.000185296
chr15	28439576	0.174783	0.0291378	4.44328e-08	0.0660915	HERC2	Intron	0.000185296
chr15	28439572	0.174778	0.0291381	4.44795e-08	0.0660834	HERC2	Intron	0.000185296
chr17	30846653	-0.174742	0.0291406	4.48192e-08	0.892749	MYO1D	Intron	0.000186304
chr19	35264128	-0.174679	0.0291449	4.54199e-08	0.875144	ZNF599	5_UTR	0.000188389
chr19	35264134	-0.174461	0.0291599	4.75532e-08	0.874779	ZNF599	5_UTR	0.000196809
chr19	35264137	-0.174351	0.0291675	4.86662e-08	0.874596	ZNF599	Intergenic (nearest gene 3 bp away)	0.000200978
chr19	35264142	-0.174166	0.0291802	5.05931e-08	0.874291	ZNF599	Intergenic (nearest gene 8 bp away)	0.000208483
chr17	30846658	-0.174026	0.0291898	5.21016e-08	0.892948	MYO1D	Intron	0.000214236
chr7	44349575	-0.174001	0.0291915	5.23689e-08	0.888417	CAMK2B	Intron	0.000214871
chr19	35264148	-0.173942	0.0291956	5.30304e-08	0.873922	ZNF599	Intergenic (nearest gene 14 bp away)	0.000217117
chr7	44349573	-0.173847	0.029202	5.40843e-08	0.888377	CAMK2B	Intron	0.000220957
chr17	30846661	-0.173595	0.0292192	5.70115e-08	0.893066	MYO1D	Intron	0.000232417
chr19	35264158	-0.173561	0.0292216	5.74192e-08	0.873305	ZNF599	Intergenic (nearest gene 24 bp away)	0.000233579
chr19	35264165	-0.17329	0.0292401	6.07553e-08	0.872871	ZNF599	Intergenic (nearest gene 31 bp away)	0.000246623
chr17	30846664	-0.173164	0.0292486	6.2371e-08	0.893183	MYO1D	Intron	0.000252643
chr7	44349564	-0.173136	0.0292505	6.27274e-08	0.88819	CAMK2B	Intron	0.000253547
chr7	44349562	-0.172974	0.0292615	6.4874e-08	0.888148	CAMK2B	Intron	0.000261668
chr7	44349557	-0.172562	0.0292895	7.06455e-08	0.88804	CAMK2B	Intron	0.000284345
chr7	44349555	-0.172395	0.0293008	7.31274e-08	0.887996	CAMK2B	Intron	0.000293713
chr19	35264189	-0.17233	0.0293052	7.41132e-08	0.871365	ZNF599	Intergenic (nearest gene 55 bp away)	0.000297046
chr7	44349553	-0.172226	0.0293122	7.57151e-08	0.887952	CAMK2B	Intron	0.000302829
chr7	44349547	-0.171711	0.0293469	8.41645e-08	0.887817	CAMK2B	Intron	0.000335918
chr7	32338240	-0.171277	0.0293761	9.19701e-08	0.865605	PDE1C	Intron	0.000366303
chr7	32338227	-0.171212	0.0293804	9.31896e-08	0.86502	PDE1C	Intron	0.000370386
chr7	32338284	-0.171152	0.0293845	9.43483e-08	0.867527	PDE1C	Coding_region	0.000373771
chr7	32338219	-0.171147	0.0293848	9.44339e-08	0.864657	PDE1C	Intron	0.000373771
chr7	32338210	-0.17105	0.0293913	9.63232e-08	0.864244	PDE1C	Intron	0.000380458
chr7	32338299	-0.171001	0.0293946	9.72937e-08	0.868163	PDE1C	Coding_region	0.000383495
chr7	32338204	-0.170971	0.0293966	9.78929e-08	0.863967	PDE1C	Intron	0.00038506
chr7	32338304	-0.170939	0.0293987	9.85145e-08	0.868373	PDE1C	Coding_region	0.000386706
chr19	35264228	-0.170668	0.0294168	1.04097e-07	0.868868	ZNF599	Intergenic (nearest gene 94 bp away)	0.00040778
chr7	32338183	-0.170596	0.0294216	1.05623e-07	0.862984	PDE1C	Intron	0.000412907
chr17	30846682	-0.170558	0.0294241	1.06431e-07	0.893865	MYO1D	Intron	0.000415214
chr7	32338335	-0.170447	0.0294315	1.0886e-07	0.86965	PDE1C	Coding_region	0.000423821
chr6	20849738	0.170409	0.029434	1.09689e-07	0.0690507	CDKAL1	Intron	0.000424751
chr6	20849730	0.170403	0.0294344	1.09824e-07	0.069054	CDKAL1	Intron	0.000424751
chr6	20849713	0.17039	0.0294353	1.10111e-07	0.069061	CDKAL1	Intron	0.000424751
chr7	32338338	-0.170389	0.0294353	1.10129e-07	0.869771	PDE1C	Coding_region	0.000424751
chr6	20849682	0.170367	0.0294368	1.10637e-07	0.0690739	CDKAL1	Intron	0.000424751
chr6	20849674	0.170361	0.0294373	1.10773e-07	0.0690772	CDKAL1	Intron	0.000424751
chr6	20849670	0.170358	0.0294375	1.10841e-07	0.0690788	CDKAL1	Intron	0.000424751
chr19	35264235	-0.170356	0.0294376	1.10884e-07	0.868413	ZNF599	Intergenic (nearest gene 101 bp away)	0.000424751
chr7	32338342	-0.170311	0.0294406	1.11898e-07	0.869932	PDE1C	Coding_region	0.000427773
chrX	619298	0.170248	0.0294447	1.1331e-07	0.159237	SHOX	Intron	0.000432306
chrX	619306	0.170236	0.0294455	1.13597e-07	0.159236	SHOX	Intron	0.000432533
chrX	619350	0.170167	0.0294501	1.15192e-07	0.159232	SHOX	Intron	0.000436475
chrX	619354	0.170161	0.0294506	1.15338e-07	0.159232	SHOX	Intron	0.000436475
chrX	619360	0.170151	0.0294512	1.15558e-07	0.159231	SHOX	Intron	0.000436475
chrX	619362	0.170148	0.0294514	1.15632e-07	0.159231	SHOX	Intron	0.000436475
chrX	619366	0.170142	0.0294518	1.15779e-07	0.159231	SHOX	Intron	0.000436475
chr7	32338352	-0.170101	0.0294545	1.16721e-07	0.870333	PDE1C	5_UTR	0.000439157
chr7	32338161	-0.170033	0.029459	1.18343e-07	0.861932	PDE1C	Intron	0.000444382
chr7	32338356	-0.170013	0.0294603	1.18815e-07	0.870492	PDE1C	5_UTR	0.000445278
chr7	32338360	-0.169922	0.0294664	1.21008e-07	0.87065	PDE1C	5_UTR	0.000452605
chr7	32338150	-0.169682	0.0294823	1.26996e-07	0.861398	PDE1C	Intron	0.00047407
chr7	44349524	-0.169613	0.0294869	1.28775e-07	0.887269	CAMK2B	Intron	0.000479075
chr7	32338373	-0.16961	0.029487	1.2884e-07	0.87116	PDE1C	5_UTR	0.000479075
chr7	32338378	-0.169483	0.0294954	1.32154e-07	0.871354	PDE1C	5_UTR	0.000490437
chr7	44349522	-0.169421	0.0294995	1.33818e-07	0.887219	CAMK2B	Intron	0.000495649
chr17	30846690	-0.169392	0.0295015	1.346e-07	0.894157	MYO1D	Intron	0.000497576
chr7	32338387	-0.169247	0.029511	1.38565e-07	0.871701	PDE1C	5_UTR	0.00051124
chr7	32338390	-0.169165	0.0295164	1.40834e-07	0.871816	PDE1C	5_UTR	0.000518609
chr7	32338396	-0.168999	0.0295273	1.45581e-07	0.872045	PDE1C	5_UTR	0.000535055
chr7	32338408	-0.168653	0.02955	1.55948e-07	0.872498	PDE1C	5_UTR	0.000572053
chr7	32338122	-0.168566	0.0295557	1.58662e-07	0.86001	PDE1C	Intron	0.000580026
chr7	32338411	-0.168564	0.0295559	1.58731e-07	0.872611	PDE1C	5_UTR	0.000580026
chr7	44349511	-0.16834	0.0295706	1.65945e-07	0.886938	CAMK2B	Intron	0.000605223
chr7	32338116	-0.168284	0.0295742	1.67786e-07	0.859708	PDE1C	Intron	0.000610769
chr7	44349509	-0.168139	0.0295837	1.72686e-07	0.886885	CAMK2B	Intron	0.000625451
chr7	32338113	-0.168137	0.0295838	1.72734e-07	0.859556	PDE1C	Intron	0.000625451
chr7	32338425	-0.168135	0.029584	1.72805e-07	0.873131	PDE1C	5_UTR	0.000625451
chr17	30846701	-0.16778	0.0296071	1.8536e-07	0.894547	MYO1D	Intron	0.00066962
chr7	32338104	-0.167673	0.0296141	1.89303e-07	0.859098	PDE1C	Intron	0.000682567
chr7	44349504	-0.167629	0.0296169	1.90936e-07	0.886752	CAMK2B	Intron	0.000687156
chr15	85292021	-0.167431	0.0296298	1.98505e-07	0.919521	ZNF592	Intron	0.000711258
chr15	85292032	-0.16743	0.0296299	1.98548e-07	0.919739	ZNF592	Intron	0.000711258
chr15	85292035	-0.167425	0.0296302	1.98754e-07	0.9198	ZNF592	Intron	0.000711258
chr15	85292044	-0.167396	0.0296321	1.99897e-07	0.919988	ZNF592	Intron	0.000713896
chr15	85292005	-0.167387	0.0296327	2.00241e-07	0.919222	ZNF592	Intron	0.000713896
chr2	158733119	-0.167324	0.0296368	2.02712e-07	0.9022	ACVR1	Intergenic (nearest gene 745 bp away)	0.000719423
chr7	32338450	-0.16732	0.029637	2.02888e-07	0.87404	PDE1C	5_UTR	0.000719423
chr7	44349501	-0.167319	0.0296371	2.02925e-07	0.886672	CAMK2B	Intron	0.000719423
chr2	158733136	-0.167301	0.0296383	2.03658e-07	0.902369	ACVR1	Intergenic (nearest gene 762 bp away)	0.00071986
chr15	85292060	-0.167291	0.0296389	2.04026e-07	0.920338	ZNF592	Intron	0.00071986
chr2	158733138	-0.167287	0.0296391	2.04183e-07	0.902386	ACVR1	Intergenic (nearest gene 764 bp away)	0.00071986
chr2	158733141	-0.167263	0.0296407	2.05151e-07	0.90241	ACVR1	Intergenic (nearest gene 767 bp away)	0.000721937
chr15	85292064	-0.167251	0.0296415	2.05634e-07	0.92043	ZNF592	Intron	0.000722301
chr15	85292067	-0.167216	0.0296438	2.07044e-07	0.9205	ZNF592	Intron	0.000725913
chr2	158733147	-0.167198	0.0296449	2.07781e-07	0.902454	ACVR1	Intergenic (nearest gene 773 bp away)	0.000727157
chr7	32338454	-0.167184	0.0296458	2.08358e-07	0.874184	PDE1C	5_UTR	0.000727839
chr15	85292074	-0.167119	0.0296501	2.11048e-07	0.920668	ZNF592	Intron	0.000734951
chr7	32338456	-0.167116	0.0296503	2.11166e-07	0.874255	PDE1C	5_UTR	0.000734951
chr2	158733157	-0.167036	0.0296554	2.14463e-07	0.902511	ACVR1	Intergenic (nearest gene 783 bp away)	0.000745065
chr15	85292080	-0.167016	0.0296568	2.15336e-07	0.920817	ZNF592	Intron	0.000745848
chr7	32338459	-0.167012	0.029657	2.15472e-07	0.874362	PDE1C	5_UTR	0.000745848
chr7	32338092	-0.166997	0.029658	2.16117e-07	0.85848	PDE1C	Intron	0.000746725
chr2	158733083	-0.166972	0.0296596	2.17165e-07	0.901719	ACVR1	Intergenic (nearest gene 709 bp away)	0.000748209
chr19	39361425	-0.166968	0.0296598	2.17333e-07	0.858591	RINL	Coding_region	0.000748209
chr7	32338461	-0.166943	0.0296614	2.18407e-07	0.874433	PDE1C	5_UTR	0.000750548
chr2	158733163	-0.166904	0.029664	2.20067e-07	0.902537	ACVR1	Intergenic (nearest gene 789 bp away)	0.000754891
chr2	158733077	-0.166874	0.0296659	2.21379e-07	0.901626	ACVR1	Intergenic (nearest gene 703 bp away)	0.000758027
chr2	158733166	-0.166828	0.0296689	2.23383e-07	0.902546	ACVR1	Intergenic (nearest gene 792 bp away)	0.000763104
chr2	158733074	-0.166821	0.0296693	2.23664e-07	0.901578	ACVR1	Intergenic (nearest gene 700 bp away)	0.000763104
chr2	158733072	-0.166785	0.0296717	2.25252e-07	0.901547	ACVR1	Intergenic (nearest gene 698 bp away)	0.000767146
chr2	158733062	-0.166591	0.0296842	2.33949e-07	0.901383	ACVR1	Intergenic (nearest gene 688 bp away)	0.000795345
chr2	158733059	-0.166528	0.0296882	2.36801e-07	0.901332	ACVR1	Intergenic (nearest gene 685 bp away)	0.000803604
chr2	158733177	-0.166476	0.0296916	2.39222e-07	0.902565	ACVR1	Intergenic (nearest gene 803 bp away)	0.000810375
chr2	158733052	-0.166377	0.029698	2.43877e-07	0.901213	ACVR1	Intergenic (nearest gene 678 bp away)	0.00082468
chr2	158733049	-0.166309	0.0297023	2.47089e-07	0.901161	ACVR1	Intergenic (nearest gene 675 bp away)	0.000831972
chr7	32338479	-0.166306	0.0297026	2.47253e-07	0.875066	PDE1C	5_UTR	0.000831972
chr15	85291915	-0.166304	0.0297027	2.47345e-07	0.917932	ZNF592	Intron	0.000831972
chr15	85291910	-0.166208	0.0297089	2.51991e-07	0.91788	ZNF592	Intron	0.000846103
chr7	32338482	-0.166197	0.0297095	2.52513e-07	0.87517	PDE1C	5_UTR	0.000846366
chr2	158733043	-0.166171	0.0297113	2.53828e-07	0.901055	ACVR1	Intergenic (nearest gene 669 bp away)	0.000848093
chr15	85291908	-0.166169	0.0297114	2.53919e-07	0.91786	ZNF592	Intron	0.000848093
chr7	32338484	-0.166125	0.0297142	2.56096e-07	0.87524	PDE1C	5_UTR	0.000853865
chr19	39361398	-0.166068	0.0297179	2.5892e-07	0.858977	RINL	Coding_region	0.000861771
chr7	32338486	-0.166052	0.0297189	2.59741e-07	0.875309	PDE1C	5_UTR	0.000862995
chr2	158733037	-0.166027	0.0297205	2.6098e-07	0.900949	ACVR1	Intergenic (nearest gene 663 bp away)	0.000864159
chr15	85291901	-0.166027	0.0297205	2.60999e-07	0.917792	ZNF592	Intron	0.000864159
chr2	158733033	-0.165929	0.0297268	2.6597e-07	0.900878	ACVR1	Intergenic (nearest gene 659 bp away)	0.000879088
chr15	85292118	-0.16591	0.029728	2.66985e-07	0.92186	ZNF592	Intron	0.000880914
chr2	158733029	-0.16583	0.0297331	2.71121e-07	0.900806	ACVR1	Intergenic (nearest gene 655 bp away)	0.000891824
chr7	44349487	-0.165828	0.0297333	2.71228e-07	0.886283	CAMK2B	Intron	0.000891824
chr15	85291890	-0.16579	0.0297357	2.7321e-07	0.917694	ZNF592	5_UTR	0.000896791
chr15	85291887	-0.165723	0.02974	2.76784e-07	0.917669	ZNF592	5_UTR	0.000906956
chr7	32338071	-0.165656	0.0297443	2.80358e-07	0.857383	PDE1C	Intron	0.000915868
chr15	85291884	-0.165654	0.0297444	2.80465e-07	0.917644	ZNF592	5_UTR	0.000915868
chr15	85291881	-0.165585	0.0297488	2.84259e-07	0.917621	ZNF592	5_UTR	0.000926666
chr2	158733196	-0.165574	0.0297495	2.84858e-07	0.902525	ACVR1	Intergenic (nearest gene 822 bp away)	0.000927031
chr15	85291878	-0.165514	0.0297534	2.88166e-07	0.917598	ZNF592	5_UTR	0.000936198
chr2	158733016	-0.1655	0.0297542	2.88916e-07	0.900574	ACVR1	Intergenic (nearest gene 642 bp away)	0.000937034
chr19	39361383	-0.165474	0.0297559	2.90398e-07	0.859192	RINL	Coding_region	0.000939517
chr15	85292128	-0.165469	0.0297562	2.90668e-07	0.922159	ZNF592	Intron	0.000939517
chr2	158733014	-0.165449	0.0297575	2.9179e-07	0.900538	ACVR1	Intergenic (nearest gene 640 bp away)	0.000941543
chr15	85292131	-0.165323	0.0297656	2.98961e-07	0.92225	ZNF592	Intron	0.000963051
chr2	158733008	-0.165294	0.0297674	3.00616e-07	0.900432	ACVR1	Intergenic (nearest gene 634 bp away)	0.000966747
chr19	39361378	-0.165259	0.0297697	3.02644e-07	0.859264	RINL	Coding_region	0.000971626
chr7	44349481	-0.165167	0.0297755	3.08025e-07	0.886111	CAMK2B	Intron	0.000987238
chr2	158733002	-0.165138	0.0297773	3.09733e-07	0.900327	ACVR1	Intergenic (nearest gene 628 bp away)	0.000991044
chr15	85292136	-0.165064	0.0297821	3.14204e-07	0.922404	ZNF592	Intron	0.00100366
chr15	85291859	-0.165038	0.0297838	3.15759e-07	0.917468	ZNF592	5_UTR	0.00100694
chr2	158732997	-0.165009	0.0297856	3.17537e-07	0.90024	ACVR1	Intergenic (nearest gene 623 bp away)	0.00101092
chr15	85291855	-0.164932	0.0297905	3.22243e-07	0.917445	ZNF592	5_UTR	0.00102267
chr2	158732994	-0.164931	0.0297906	3.22303e-07	0.900188	ACVR1	Intergenic (nearest gene 620 bp away)	0.00102267
chr15	85291853	-0.164878	0.0297939	3.25579e-07	0.917433	ZNF592	5_UTR	0.00103134
chr15	85292140	-0.164842	0.0297962	3.27825e-07	0.922529	ZNF592	Intron	0.00103674
chr15	85291851	-0.164824	0.0297974	3.2898e-07	0.917422	ZNF592	5_UTR	0.00103866
chr15	85291849	-0.164769	0.0298009	3.32446e-07	0.917412	ZNF592	5_UTR	0.00104787
chr2	158732592	-0.164699	0.0298053	3.36908e-07	0.906062	ACVR1	Intergenic (nearest gene 218 bp away)	0.00105858
chr2	158732586	-0.16469	0.0298059	3.37478e-07	0.906405	ACVR1	Intergenic (nearest gene 212 bp away)	0.00105858
chr2	158732603	-0.164684	0.0298063	3.3788e-07	0.905453	ACVR1	Intergenic (nearest gene 229 bp away)	0.00105858
chr2	158732583	-0.164681	0.0298064	3.3807e-07	0.906579	ACVR1	Intergenic (nearest gene 209 bp away)	0.00105858
chr15	85292143	-0.164667	0.0298073	3.38971e-07	0.922623	ZNF592	Intron	0.00105966
chr2	158732577	-0.164653	0.0298082	3.39898e-07	0.906932	ACVR1	Intergenic (nearest gene 203 bp away)	0.00106082
chr15	85291840	-0.164516	0.0298169	3.4889e-07	0.917367	ZNF592	5_UTR	0.0010871
chr2	158732559	-0.164485	0.0298189	3.50967e-07	0.908035	ACVR1	Intergenic (nearest gene 185 bp away)	0.00109178
chr2	158732975	-0.164444	0.0298215	3.53697e-07	0.89987	ACVR1	Intergenic (nearest gene 601 bp away)	0.00109848
chr15	85291837	-0.164429	0.0298224	3.54693e-07	0.917353	ZNF592	5_UTR	0.00109978
chr2	158732551	-0.164368	0.0298263	3.58864e-07	0.908545	ACVR1	Intergenic (nearest gene 177 bp away)	0.00111091
chr15	85292148	-0.164358	0.0298269	3.59534e-07	0.92278	ZNF592	Intron	0.00111117
chr2	158732549	-0.164335	0.0298284	3.61154e-07	0.908675	ACVR1	Intergenic (nearest gene 175 bp away)	0.00111437
chr2	158732546	-0.164281	0.0298318	3.6484e-07	0.90887	ACVR1	Intergenic (nearest gene 172 bp away)	0.00112392
chr15	85291831	-0.164253	0.0298336	3.66806e-07	0.917328	ZNF592	5_UTR	0.00112815
chr19	39361354	-0.164099	0.0298433	3.77726e-07	0.859612	RINL	Coding_region	0.00115883
chr15	85292152	-0.164095	0.0298436	3.77996e-07	0.922908	ZNF592	Intron	0.00115883
chr2	158733217	-0.164063	0.0298456	3.80295e-07	0.90236	ACVR1	Intergenic (nearest gene 843 bp away)	0.001164
chr2	158732956	-0.163979	0.0298509	3.86419e-07	0.899575	ACVR1	Intergenic (nearest gene 582 bp away)	0.00118084
chr7	44349470	-0.163922	0.0298545	3.9059e-07	0.885787	CAMK2B	Intron	0.00119168
chr15	85292155	-0.163887	0.0298567	3.93162e-07	0.923003	ZNF592	Intron	0.00119588
chr2	158733219	-0.163887	0.0298567	3.93222e-07	0.902337	ACVR1	Intergenic (nearest gene 845 bp away)	0.00119588
chr7	32338047	-0.163872	0.0298576	3.94295e-07	0.856101	PDE1C	Intron	0.00119723
chr2	158732523	-0.16374	0.029866	4.04269e-07	0.910419	ACVR1	Intergenic (nearest gene 149 bp away)	0.00122556
chr15	85291814	-0.163729	0.0298667	4.05127e-07	0.917269	ZNF592	Intergenic (nearest gene 3 bp away)	0.0012262
chr2	158733221	-0.163704	0.0298682	4.07024e-07	0.902312	ACVR1	Intergenic (nearest gene 847 bp away)	0.00122999
chr15	85291811	-0.163633	0.0298727	4.12555e-07	0.917261	ZNF592	Intergenic (nearest gene 6 bp away)	0.00124345
chr7	32338044	-0.16363	0.0298729	4.12783e-07	0.855939	PDE1C	Intron	0.00124345
chr7	44349467	-0.163575	0.0298764	4.17107e-07	0.885696	CAMK2B	Intron	0.00125449
chr15	85291808	-0.163536	0.0298788	4.20199e-07	0.917253	ZNF592	Intergenic (nearest gene 9 bp away)	0.00126179
chr2	158732515	-0.163496	0.0298813	4.23358e-07	0.910979	ACVR1	Intergenic (nearest gene 141 bp away)	0.00126928
chrX	517778	0.163404	0.0298871	4.30817e-07	0.149932	SHOX	Intergenic (nearest gene 67300 bp away)	0.00128961
chr7	32338041	-0.163384	0.0298884	4.32438e-07	0.855776	PDE1C	Intron	0.00129243
chr15	85291802	-0.163338	0.0298913	4.36158e-07	0.91724	ZNF592	Intergenic (nearest gene 15 bp away)	0.0013015
chr2	158732510	-0.163329	0.0298919	4.36944e-07	0.911333	ACVR1	Intergenic (nearest gene 136 bp away)	0.00130181
chr19	39361340	-0.163312	0.0298929	4.38312e-07	0.859817	RINL	Coding_region	0.00130384
chr2	158733226	-0.163231	0.029898	4.45042e-07	0.902224	ACVR1	Intergenic (nearest gene 852 bp away)	0.0013218
chr7	32338039	-0.163217	0.0298989	4.4623e-07	0.855668	PDE1C	Intron	0.00132326
chr15	85291798	-0.163204	0.0298997	4.47316e-07	0.917232	ZNF592	Intergenic (nearest gene 19 bp away)	0.00132442
chr2	158732505	-0.16315	0.0299031	4.51918e-07	0.911692	ACVR1	Intergenic (nearest gene 131 bp away)	0.00133597
chr7	32338037	-0.163048	0.0299094	4.60602e-07	0.855559	PDE1C	Intron	0.00135953
chr15	85291790	-0.16293	0.0299168	4.70953e-07	0.917219	ZNF592	Intergenic (nearest gene 27 bp away)	0.00138793
chr2	158732896	-0.162796	0.0299252	4.82973e-07	0.898877	ACVR1	Intergenic (nearest gene 522 bp away)	0.00142115
chr6	168968554	0.16275	0.0299281	4.87167e-07	0.136033	SMOC2	Intron	0.00143128
chr2	158732891	-0.162724	0.0299297	4.89526e-07	0.89884	ACVR1	Intergenic (nearest gene 517 bp away)	0.0014323
chr6	168968560	0.162721	0.0299299	4.89777e-07	0.13601	SMOC2	Intron	0.0014323
chr15	85291784	-0.16272	0.02993	4.89908e-07	0.917213	ZNF592	Intergenic (nearest gene 33 bp away)	0.0014323
chr15	85292170	-0.162713	0.0299304	4.90522e-07	0.923488	ZNF592	Intron	0.0014323
chr2	158732752	-0.162678	0.0299326	4.93745e-07	0.899758	ACVR1	Intergenic (nearest gene 378 bp away)	0.00143853
chr2	158732493	-0.162673	0.0299329	4.94169e-07	0.912567	ACVR1	Intergenic (nearest gene 119 bp away)	0.00143853
chrX	513144	0.162636	0.0299353	4.97675e-07	0.148965	SHOX	Intergenic (nearest gene 71934 bp away)	0.00144653
chr2	158732758	-0.162613	0.0299367	4.99821e-07	0.899626	ACVR1	Intergenic (nearest gene 384 bp away)	0.00145055
chr2	158732761	-0.162582	0.0299386	5.02689e-07	0.899564	ACVR1	Intergenic (nearest gene 387 bp away)	0.00145665
chr6	168968590	0.162571	0.0299393	5.03745e-07	0.135894	SMOC2	Intron	0.0014575
chr15	85291778	-0.162505	0.0299434	5.09988e-07	0.917208	ZNF592	Intergenic (nearest gene 39 bp away)	0.00147309
chr6	168968604	0.162498	0.0299439	5.10684e-07	0.13584	SMOC2	Intron	0.00147309
chr2	158732771	-0.162489	0.0299444	5.11546e-07	0.899371	ACVR1	Intergenic (nearest gene 397 bp away)	0.00147335
chr2	158732863	-0.162412	0.0299492	5.18931e-07	0.898706	ACVR1	Intergenic (nearest gene 489 bp away)	0.00149045
chr2	158732487	-0.162411	0.0299493	5.19049e-07	0.913011	ACVR1	Intergenic (nearest gene 113 bp away)	0.00149045
chr2	158732854	-0.162346	0.0299533	5.25386e-07	0.898692	ACVR1	Intergenic (nearest gene 480 bp away)	0.00150637
chr15	85291773	-0.162323	0.0299548	5.27636e-07	0.917205	ZNF592	Intergenic (nearest gene 44 bp away)	0.00151014
chr2	158732849	-0.162316	0.0299552	5.28286e-07	0.898691	ACVR1	Intergenic (nearest gene 475 bp away)	0.00151014
chr2	158732800	-0.162296	0.0299564	5.30256e-07	0.898954	ACVR1	Intergenic (nearest gene 426 bp away)	0.00151179
chr2	158732803	-0.162284	0.0299572	5.31453e-07	0.898922	ACVR1	Intergenic (nearest gene 429 bp away)	0.00151179
chr2	158732484	-0.162273	0.0299578	5.32534e-07	0.913235	ACVR1	Intergenic (nearest gene 110 bp away)	0.00151179
chr2	158732829	-0.16225	0.0299593	5.34833e-07	0.898736	ACVR1	Intergenic (nearest gene 455 bp away)	0.00151179
chr2	158732817	-0.16225	0.0299593	5.34888e-07	0.898803	ACVR1	Intergenic (nearest gene 443 bp away)	0.00151179
chr2	158732826	-0.162247	0.0299595	5.35116e-07	0.89875	ACVR1	Intergenic (nearest gene 452 bp away)	0.00151179
chr2	158732820	-0.162247	0.0299595	5.35141e-07	0.898783	ACVR1	Intergenic (nearest gene 446 bp away)	0.00151179
chr2	158732823	-0.162246	0.0299595	5.35218e-07	0.898765	ACVR1	Intergenic (nearest gene 449 bp away)	0.00151179
chr6	168968658	0.162209	0.0299618	5.38913e-07	0.135627	SMOC2	Intron	0.00151998
chr15	85292176	-0.162173	0.0299641	5.42619e-07	0.923683	ZNF592	Intron	0.00152626
chr6	168968665	0.162171	0.0299642	5.42743e-07	0.135598	SMOC2	Intron	0.00152626
chr2	158732481	-0.162132	0.0299666	5.4676e-07	0.913461	ACVR1	Intergenic (nearest gene 107 bp away)	0.00153529
chr15	85291767	-0.1621	0.0299686	5.49992e-07	0.917204	ZNF592	Intergenic (nearest gene 50 bp away)	0.00154209
chr7	44349454	-0.162034	0.0299727	5.56816e-07	0.885295	CAMK2B	Intron	0.00155892
chr15	85291760	-0.161835	0.0299851	5.77807e-07	0.917205	ZNF592	Intergenic (nearest gene 57 bp away)	0.00161532
chr4	154388182	-0.161795	0.0299876	5.82095e-07	0.885164	TMEM131L	Intron	0.00162492
chr2	158732471	-0.161632	0.0299977	6.00005e-07	0.91422	ACVR1	Intergenic (nearest gene 97 bp away)	0.00167246
chr15	85291752	-0.161525	0.0300043	6.12024e-07	0.917209	ZNF592	Intergenic (nearest gene 65 bp away)	0.00170347
chr15	85291749	-0.161406	0.0300116	6.25551e-07	0.917211	ZNF592	Intergenic (nearest gene 68 bp away)	0.00173858
chr6	168968808	0.16137	0.0300139	6.29758e-07	0.135001	SMOC2	Intron	0.00174772
chr6	168968815	0.16133	0.0300164	6.34457e-07	0.134971	SMOC2	Intron	0.0017582
chrX	502136	0.161073	0.0300322	6.6529e-07	0.146739	SHOX	Intergenic (nearest gene 82942 bp away)	0.00184096
chr6	168968883	0.160935	0.0300407	6.82345e-07	0.134671	SMOC2	Intron	0.00188542
chr6	168968890	0.160894	0.0300432	6.87511e-07	0.13464	SMOC2	Intron	0.00189694
chr15	85292189	-0.160841	0.0300465	6.9435e-07	0.924106	ZNF592	Intron	0.00191303
chr4	154388179	-0.160667	0.0300572	7.16879e-07	0.885526	TMEM131L	Intron	0.00197225
chr15	85292191	-0.160614	0.0300604	7.23823e-07	0.924171	ZNF592	Intron	0.00198848
chr7	44349441	-0.160434	0.0300715	7.48131e-07	0.884877	CAMK2B	Intron	0.0020523
chr7	32338007	-0.160294	0.0300801	7.67605e-07	0.8539	PDE1C	Intron	0.00210269
chr14	95675744	0.160205	0.0300855	7.80189e-07	0.117289	CLMN	Coding_region	0.00213409
chr14	95675751	0.160189	0.0300865	7.82438e-07	0.117411	CLMN	Coding_region	0.00213652
chr7	44349439	-0.160183	0.0300869	7.83322e-07	0.884811	CAMK2B	Intron	0.00213652
chr14	95675770	0.160145	0.0300892	7.88722e-07	0.117743	CLMN	Coding_region	0.00214817
chrX	493872	0.160122	0.0300906	7.92116e-07	0.14513	SHOX	Intergenic (nearest gene 91206 bp away)	0.00215433
chr14	95675791	0.160095	0.0300923	7.95979e-07	0.11811	CLMN	Coding_region	0.00216175
chr7	32338635	-0.160083	0.030093	7.97744e-07	0.880072	PDE1C	5_UTR	0.00216346
chr16	303768	0.160012	0.0300973	8.08138e-07	0.0406404	FAM234A	Intron	0.00218853
chr7	32338637	-0.159998	0.0300982	8.10164e-07	0.880131	PDE1C	5_UTR	0.0021909
chr14	95675859	0.15992	0.030103	8.21863e-07	0.119294	CLMN	Intron	0.0022187
chr7	32338639	-0.159913	0.0301034	8.22776e-07	0.88019	PDE1C	5_UTR	0.0022187
chr14	95675877	0.15987	0.030106	8.29361e-07	0.119606	CLMN	Intron	0.0022333
chr15	85292198	-0.159773	0.0301119	8.4402e-07	0.924397	ZNF592	Intron	0.00225636
chrX	490160	0.159752	0.0301132	8.47362e-07	0.144439	SHOX	Intergenic (nearest gene 94918 bp away)	0.00225636
chrX	490156	0.159751	0.0301132	8.4742e-07	0.144438	SHOX	Intergenic (nearest gene 94922 bp away)	0.00225636
chrX	490148	0.159751	0.0301133	8.47538e-07	0.144437	SHOX	Intergenic (nearest gene 94930 bp away)	0.00225636
chrX	490144	0.15975	0.0301133	8.47596e-07	0.144436	SHOX	Intergenic (nearest gene 94934 bp away)	0.00225636
chrX	490124	0.159748	0.0301134	8.47889e-07	0.144432	SHOX	Intergenic (nearest gene 94954 bp away)	0.00225636
chrX	490100	0.159746	0.0301136	8.48241e-07	0.144428	SHOX	Intergenic (nearest gene 94978 bp away)	0.00225636
chrX	490092	0.159745	0.0301136	8.48358e-07	0.144426	SHOX	Intergenic (nearest gene 94986 bp away)	0.00225636
chr7	32338643	-0.159744	0.0301137	8.48591e-07	0.880307	PDE1C	5_UTR	0.00225636
chr16	303926	0.159705	0.030116	8.54546e-07	0.0406875	FAM234A	Intron	0.00226902
chr7	44349435	-0.159676	0.0301178	8.59091e-07	0.884679	CAMK2B	Intron	0.00227791
chr7	32338647	-0.159574	0.0301241	8.75209e-07	0.880424	PDE1C	5_UTR	0.00231742
chr7	32338649	-0.159489	0.0301292	8.88827e-07	0.880482	PDE1C	5_UTR	0.00235021
chr7	32337998	-0.159385	0.0301355	9.05711e-07	0.853393	PDE1C	Intron	0.00239153
chr7	32338655	-0.159233	0.0301448	9.3095e-07	0.880656	PDE1C	5_UTR	0.00245477
chr15	85292203	-0.159124	0.0301514	9.49613e-07	0.924556	ZNF592	Intron	0.00249339
chr19	45252247	-0.159116	0.0301519	9.50959e-07	0.860039	BCL3	Coding_region	0.00249339
chr19	45252239	-0.159113	0.0301521	9.5143e-07	0.860117	BCL3	Coding_region	0.00249339
chr19	45252233	-0.159108	0.0301524	9.5234e-07	0.860171	BCL3	Coding_region	0.00249339
chr19	45252230	-0.159104	0.0301526	9.5297e-07	0.860198	BCL3	Coding_region	0.00249339
chr19	45252228	-0.159101	0.0301528	9.53455e-07	0.860215	BCL3	Coding_region	0.00249339
chr19	45252209	-0.15906	0.0301553	9.60651e-07	0.860362	BCL3	Coding_region	0.00250877
chr19	45252199	-0.159027	0.0301573	9.66285e-07	0.860428	BCL3	Coding_region	0.00252002
chr19	45252194	-0.159009	0.0301584	9.69568e-07	0.860459	BCL3	Coding_region	0.00252513
chr19	45252191	-0.158996	0.0301591	9.71684e-07	0.860476	BCL3	Coding_region	0.00252718
chr19	45252189	-0.158988	0.0301596	9.73153e-07	0.860487	BCL3	Coding_region	0.00252755
chr19	45252182	-0.158957	0.0301615	9.78662e-07	0.860524	BCL3	Coding_region	0.00253839
chr19	45252179	-0.158943	0.0301624	9.81197e-07	0.860538	BCL3	Coding_region	0.00254151
chr19	45252172	-0.158907	0.0301646	9.87515e-07	0.860569	BCL3	Coding_region	0.0025544
chr19	45252163	-0.158857	0.0301676	9.96462e-07	0.860605	BCL3	Coding_region	0.00256876
chr19	45252161	-0.158845	0.0301683	9.98576e-07	0.860611	BCL3	Coding_region	0.00256876
chr15	85291689	-0.158835	0.0301689	1.00035e-06	0.917334	ZNF592	Intergenic (nearest gene 128 bp away)	0.00256876
chr19	45252159	-0.158833	0.030169	1.00074e-06	0.860618	BCL3	Coding_region	0.00256876
chr19	45252329	-0.158828	0.0301693	1.0017e-06	0.858952	BCL3	Intron	0.00256876
chrX	478377	0.158818	0.0301699	1.0035e-06	0.142985	SHOX	Intergenic (nearest gene 106701 bp away)	0.00256876
chr7	32338665	-0.158807	0.0301706	1.00556e-06	0.880943	PDE1C	5_UTR	0.00256876
chrX	478133	0.158803	0.0301709	1.00629e-06	0.142976	SHOX	Intergenic (nearest gene 106945 bp away)	0.00256876
chr19	45252154	-0.158802	0.0301709	1.00633e-06	0.860634	BCL3	Coding_region	0.00256876
chrX	478109	0.158801	0.030171	1.00656e-06	0.142975	SHOX	Intergenic (nearest gene 106969 bp away)	0.00256876
chr19	45252150	-0.158777	0.0301724	1.01102e-06	0.860645	BCL3	Coding_region	0.00257667
chr19	45252144	-0.158736	0.0301749	1.01838e-06	0.860659	BCL3	Coding_region	0.00259197
chr19	45252139	-0.158701	0.030177	1.02482e-06	0.860669	BCL3	Coding_region	0.00260489
chr19	45252133	-0.158657	0.0301796	1.03293e-06	0.860678	BCL3	Coding_region	0.00262199
chr19	45252131	-0.158642	0.0301806	1.03572e-06	0.860681	BCL3	Coding_region	0.00262557
chr19	45252128	-0.15862	0.0301819	1.03999e-06	0.860684	BCL3	Coding_region	0.0026329
chr15	85292207	-0.158572	0.0301848	1.04893e-06	0.924682	ZNF592	Intron	0.00265201
chr2	158732421	-0.158519	0.030188	1.05894e-06	0.918161	ACVR1	Intergenic (nearest gene 47 bp away)	0.00267375
chr7	32338672	-0.158507	0.0301887	1.06125e-06	0.881142	PDE1C	5_UTR	0.00267604
chr7	32338674	-0.158421	0.0301939	1.07771e-06	0.881199	PDE1C	5_UTR	0.00271394
chr19	45252102	-0.158403	0.030195	1.08125e-06	0.860686	BCL3	Coding_region	0.00271926
chr19	45252096	-0.158349	0.0301983	1.09185e-06	0.860679	BCL3	Coding_region	0.0027423
chr19	45252086	-0.158255	0.0302039	1.11043e-06	0.860663	BCL3	Coding_region	0.00278531
chr19	45252077	-0.158166	0.0302093	1.12814e-06	0.860642	BCL3	Coding_region	0.00282524
chr22	50222450	0.158161	0.0302096	1.12932e-06	0.0569181	BRD1	Intergenic (nearest gene 875 bp away)	0.00282524
chr19	45252392	-0.158152	0.0302101	1.13111e-06	0.857752	BCL3	Intron	0.002826
chr19	45252064	-0.158033	0.0302173	1.15538e-06	0.860601	BCL3	Coding_region	0.00288284
chr19	45252062	-0.158012	0.0302185	1.15974e-06	0.860594	BCL3	Coding_region	0.00288995
chrX	460077	0.157993	0.0302197	1.16362e-06	0.143752	PPP2R3B	Intergenic (nearest gene 112387 bp away)	0.00289357
chr15	85292211	-0.15799	0.0302198	1.16423e-06	0.924807	ZNF592	Intron	0.00289357
chr15	85291671	-0.157983	0.0302203	1.16584e-06	0.917389	ZNF592	Intergenic (nearest gene 146 bp away)	0.00289378
chr19	45252054	-0.157926	0.0302237	1.17768e-06	0.860562	BCL3	Coding_region	0.00291938
chr7	32337984	-0.157898	0.0302254	1.18366e-06	0.852596	PDE1C	Intron	0.00293037
chr2	158732412	-0.157864	0.0302274	1.19089e-06	0.918889	ACVR1	Intergenic (nearest gene 38 bp away)	0.00294444
chr19	45252041	-0.157782	0.0302324	1.20848e-06	0.860501	BCL3	5_UTR	0.00296352
chr3	40202448	0.157768	0.0302332	1.21139e-06	0.0876548	MYRIP	Intron	0.00296352
chrX	451551	0.157768	0.0302332	1.21148e-06	0.143755	PPP2R3B	Intergenic (nearest gene 103861 bp away)	0.00296352
chrX	451539	0.157767	0.0302332	1.21154e-06	0.143755	PPP2R3B	Intergenic (nearest gene 103849 bp away)	0.00296352
chrX	451520	0.157767	0.0302333	1.21163e-06	0.143754	PPP2R3B	Intergenic (nearest gene 103830 bp away)	0.00296352
chrX	451515	0.157767	0.0302333	1.21166e-06	0.143754	PPP2R3B	Intergenic (nearest gene 103825 bp away)	0.00296352
chrX	451483	0.157766	0.0302333	1.21181e-06	0.143752	PPP2R3B	Intergenic (nearest gene 103793 bp away)	0.00296352
chr3	40202457	0.157764	0.0302334	1.21231e-06	0.0876563	MYRIP	Intron	0.00296352
chr3	40202460	0.157762	0.0302335	1.21261e-06	0.0876568	MYRIP	Intron	0.00296352
chr19	45252038	-0.157747	0.0302344	1.21588e-06	0.860485	BCL3	5_UTR	0.0029677
chr7	32338694	-0.157563	0.0302455	1.25651e-06	0.881759	PDE1C	5_UTR	0.00306294
chr2	158732407	-0.157489	0.0302499	1.27316e-06	0.919295	ACVR1	Intergenic (nearest gene 33 bp away)	0.00309956
chr2	158733273	-0.157406	0.0302549	1.29208e-06	0.899042	ACVR1	Intergenic (nearest gene 899 bp away)	0.0031416
chr4	154388171	-0.157313	0.0302605	1.31373e-06	0.886459	TMEM131L	Intron	0.00319017
chr2	158732402	-0.157107	0.0302727	1.36251e-06	0.919703	ACVR1	Intergenic (nearest gene 28 bp away)	0.00330439
chr15	85292217	-0.157058	0.0302756	1.37434e-06	0.924992	ZNF592	Intron	0.00332885
chr22	50222423	0.157003	0.0302789	1.38789e-06	0.0550153	BRD1	Intergenic (nearest gene 848 bp away)	0.00335741
chr22	50222421	0.156881	0.0302862	1.41828e-06	0.054875	BRD1	Intergenic (nearest gene 846 bp away)	0.00342655
chr2	154550545	0.156845	0.0302883	1.42724e-06	0.0418639	GALNT13	Intergenic (nearest gene 177865 bp away)	0.00343146
chr2	154550537	0.156843	0.0302885	1.4277e-06	0.0418645	GALNT13	Intergenic (nearest gene 177873 bp away)	0.00343146
chr2	154550489	0.156832	0.0302891	1.43044e-06	0.0418677	GALNT13	Intergenic (nearest gene 177921 bp away)	0.00343146
chr7	32338711	-0.156831	0.0302892	1.43073e-06	0.882226	PDE1C	5_UTR	0.00343146
chr2	154550481	0.156831	0.0302892	1.43089e-06	0.0418682	GALNT13	Intergenic (nearest gene 177929 bp away)	0.00343146
chr2	154550477	0.15683	0.0302893	1.43112e-06	0.0418685	GALNT13	Intergenic (nearest gene 177933 bp away)	0.00343146
chr7	32338713	-0.156745	0.0302943	1.45269e-06	0.88228	PDE1C	5_UTR	0.00347879
chr2	158732397	-0.156719	0.0302959	1.45949e-06	0.920111	ACVR1	Intergenic (nearest gene 23 bp away)	0.00349069
chr15	85292220	-0.156564	0.0303051	1.49988e-06	0.925083	ZNF592	Intron	0.00357991
chr2	158732395	-0.156561	0.0303052	1.50056e-06	0.920274	ACVR1	Intergenic (nearest gene 21 bp away)	0.00357991
chr22	50222414	0.156407	0.0303143	1.5418e-06	0.0543845	BRD1	Intergenic (nearest gene 839 bp away)	0.0036737
chr2	158732392	-0.156324	0.0303193	1.56472e-06	0.920519	ACVR1	Intergenic (nearest gene 18 bp away)	0.00372365
chr2	158733279	-0.156279	0.0303219	1.57692e-06	0.898314	ACVR1	Intergenic (nearest gene 905 bp away)	0.00374799
chrX	414993	0.15593	0.0303426	1.67667e-06	0.139438	PPP2R3B	Intergenic (nearest gene 67303 bp away)	0.00398012
chr2	158732387	-0.155923	0.030343	1.67884e-06	0.920929	ACVR1	Intergenic (nearest gene 13 bp away)	0.0039803
chr2	158733281	-0.155872	0.030346	1.69369e-06	0.898054	ACVR1	Intergenic (nearest gene 907 bp away)	0.0040105
chr15	85291628	-0.155772	0.0303519	1.7237e-06	0.917526	ZNF592	Intergenic (nearest gene 189 bp away)	0.00407649
chr2	158732385	-0.155761	0.0303526	1.72713e-06	0.921092	ACVR1	Intergenic (nearest gene 11 bp away)	0.00407955
chr7	32337965	-0.155739	0.0303539	1.73359e-06	0.851498	PDE1C	Intron	0.00408974
chr19	45251888	-0.155688	0.0303569	1.74917e-06	0.858919	BCL3	Intergenic (nearest gene 89 bp away)	0.00412138
chr19	45251878	-0.15553	0.0303662	1.79833e-06	0.858762	BCL3	Intergenic (nearest gene 99 bp away)	0.00423198
chr2	158732382	-0.155516	0.030367	1.80254e-06	0.921338	ACVR1	Intergenic (nearest gene 8 bp away)	0.00423665
chr16	304833	0.155488	0.0303687	1.81157e-06	0.0394426	FAM234A	Intron	0.00425261
chr19	45251874	-0.155465	0.03037	1.81857e-06	0.858698	BCL3	Intergenic (nearest gene 103 bp away)	0.0042638
chr4	154388167	-0.155455	0.0303706	1.82188e-06	0.886907	TMEM131L	Intron	0.00426588
chr2	158733283	-0.155448	0.030371	1.82394e-06	0.897786	ACVR1	Intergenic (nearest gene 909 bp away)	0.00426588
chr16	304848	0.155374	0.0303754	1.84774e-06	0.039422	FAM234A	Intron	0.00431625
chr2	158732380	-0.155352	0.0303767	1.85487e-06	0.921502	ACVR1	Intergenic (nearest gene 6 bp away)	0.00432758
chr15	85291620	-0.155333	0.0303777	1.86089e-06	0.91755	ZNF592	Intergenic (nearest gene 197 bp away)	0.00433308
chr15	85292227	-0.155331	0.0303779	1.86178e-06	0.925292	ZNF592	Intron	0.00433308
chr22	50223599	0.155291	0.0303802	1.8746e-06	0.113674	BRD1	Intergenic (nearest gene 2024 bp away)	0.00435761
chr19	45251852	-0.155106	0.0303911	1.93605e-06	0.858325	BCL3	Intergenic (nearest gene 125 bp away)	0.00449064
chr2	158732377	-0.155104	0.0303912	1.93655e-06	0.921748	ACVR1	Intergenic (nearest gene 3 bp away)	0.00449064
chr19	45251849	-0.155056	0.030394	1.95291e-06	0.858271	BCL3	Intergenic (nearest gene 128 bp away)	0.00452306
chr15	85291613	-0.154942	0.0304007	1.99183e-06	0.91757	ZNF592	Intergenic (nearest gene 204 bp away)	0.00460761
chr19	45251840	-0.154905	0.0304029	2.00473e-06	0.858108	BCL3	Intergenic (nearest gene 137 bp away)	0.00463181
chr16	304931	0.154704	0.0304146	2.07574e-06	0.0393604	FAM234A	Intron	0.00479007
chr16	304946	0.154575	0.0304222	2.12268e-06	0.0393589	FAM234A	Intron	0.00489246
chr15	85291606	-0.154544	0.030424	2.13408e-06	0.917589	ZNF592	Intergenic (nearest gene 211 bp away)	0.00491277
chr4	154388165	-0.154484	0.0304275	2.1565e-06	0.887127	TMEM131L	Intron	0.00495609
chr16	304957	0.154479	0.0304278	2.15838e-06	0.0393597	FAM234A	Intron	0.00495609
chr18	29264811	-0.154472	0.0304282	2.1607e-06	0.898314	B4GALT6	Intergenic (nearest gene 125 bp away)	0.00495609
chr19	45251813	-0.154442	0.03043	2.17219e-06	0.85759	BCL3	Intergenic (nearest gene 164 bp away)	0.00497645
chr16	304966	0.154399	0.0304325	2.18841e-06	0.0393615	FAM234A	Intron	0.00500758
chr19	45251808	-0.154354	0.0304351	2.20538e-06	0.857489	BCL3	Intergenic (nearest gene 169 bp away)	0.00504035
chr15	85291602	-0.154313	0.0304375	2.22089e-06	0.917599	ZNF592	Intergenic (nearest gene 215 bp away)	0.00506972
chr19	45251804	-0.154283	0.0304392	2.23246e-06	0.857407	BCL3	Intergenic (nearest gene 173 bp away)	0.00509001
chr2	158732367	-0.154267	0.0304401	2.23864e-06	0.922567	ACVR1	5_UTR	0.005098
chr19	45251802	-0.154248	0.0304413	2.24618e-06	0.857366	BCL3	Intergenic (nearest gene 175 bp away)	0.00510906
chr22	50223725	0.154205	0.0304438	2.26284e-06	0.116214	BRD1	Intergenic (nearest gene 2150 bp away)	0.00513027
chr6	1708954	0.154203	0.0304439	2.26358e-06	0.0761993	GMDS	Intron	0.00513027
chr6	1708977	0.154198	0.0304441	2.26536e-06	0.0761771	GMDS	Intron	0.00513027
chr19	45251799	-0.154194	0.0304444	2.26698e-06	0.857304	BCL3	Intergenic (nearest gene 178 bp away)	0.00513027
chr6	1709019	0.154189	0.0304447	2.26897e-06	0.076136	GMDS	Intron	0.00513027
chr19	45251797	-0.154158	0.0304465	2.28101e-06	0.857262	BCL3	Intergenic (nearest gene 180 bp away)	0.00515136
chr16	304999	0.154097	0.0304501	2.3054e-06	0.0393771	FAM234A	Intron	0.00520026
chr19	45251792	-0.154068	0.0304517	2.31663e-06	0.857157	BCL3	Intergenic (nearest gene 185 bp away)	0.00521941
chr15	85291597	-0.154021	0.0304545	2.33553e-06	0.917611	ZNF592	Intergenic (nearest gene 220 bp away)	0.00525578
chr16	305011	0.153983	0.0304567	2.3508e-06	0.0393862	FAM234A	Intron	0.00528389
chr2	158732363	-0.153928	0.0304599	2.37337e-06	0.922894	ACVR1	5_UTR	0.00532834
chr19	45251778	-0.153813	0.0304666	2.42069e-06	0.856855	BCL3	Intergenic (nearest gene 199 bp away)	0.00542818
chr16	305044	0.153661	0.0304753	2.48434e-06	0.0394204	FAM234A	Intron	0.00556435
chr15	85291590	-0.153606	0.0304786	2.50813e-06	0.917626	ZNF592	Intergenic (nearest gene 227 bp away)	0.00561103
chr15	85291588	-0.153486	0.0304855	2.56021e-06	0.91763	ZNF592	Intergenic (nearest gene 229 bp away)	0.00572083
chr22	50225735	0.153468	0.0304865	2.5679e-06	0.134101	BRD1	Intergenic (nearest gene 4160 bp away)	0.00573129
chr2	158733292	-0.153315	0.0304954	2.63588e-06	0.896468	ACVR1	Intergenic (nearest gene 918 bp away)	0.0058761
chr15	85291585	-0.153304	0.030496	2.6408e-06	0.917636	ZNF592	Intergenic (nearest gene 232 bp away)	0.0058802
chr1	76196820	-0.153265	0.0304983	2.65872e-06	0.825732	ACADM	Intron	0.00591318
chr1	76196824	-0.153245	0.0304994	2.66755e-06	0.825715	ACADM	Intron	0.00592591
chr1	76196826	-0.153236	0.0305	2.67199e-06	0.825706	ACADM	Intron	0.00592884
chr17	73285671	-0.153041	0.0305112	2.76217e-06	0.898662	SLC25A19	Intergenic (nearest gene 141 bp away)	0.00611853
chr17	73285674	-0.153037	0.0305114	2.7639e-06	0.899094	SLC25A19	Intergenic (nearest gene 144 bp away)	0.00611853
chr1	76196880	-0.15297	0.0305153	2.79561e-06	0.825472	ACADM	Intron	0.00618152
chr1	76196888	-0.152931	0.0305176	2.81458e-06	0.825437	ACADM	Intron	0.00621625
chr17	73285648	-0.152908	0.0305189	2.82558e-06	0.895289	SLC25A19	Intergenic (nearest gene 118 bp away)	0.00623332
chr17	73285646	-0.152882	0.0305204	2.83808e-06	0.894991	SLC25A19	Intergenic (nearest gene 116 bp away)	0.00625365
chr22	50222379	0.152832	0.0305232	2.86223e-06	0.0519459	BRD1	Intergenic (nearest gene 804 bp away)	0.00629957
chr17	73285700	-0.152825	0.0305237	2.86589e-06	0.902768	SLC25A19	Intergenic (nearest gene 170 bp away)	0.00630033
chr15	85291577	-0.152814	0.0305243	2.87118e-06	0.917649	ZNF592	Intergenic (nearest gene 240 bp away)	0.00630468
chr17	73285708	-0.152699	0.0305309	2.92743e-06	0.903873	SLC25A19	Intergenic (nearest gene 178 bp away)	0.0064208
chr17	73285710	-0.152664	0.0305329	2.945e-06	0.904147	SLC25A19	Intergenic (nearest gene 180 bp away)	0.00645191
chr15	85291574	-0.152627	0.030535	2.96382e-06	0.917653	ZNF592	Intergenic (nearest gene 243 bp away)	0.00648567
chr17	73285714	-0.152589	0.0305372	2.98277e-06	0.904694	SLC25A19	Intergenic (nearest gene 184 bp away)	0.00651965
chr17	73285629	-0.152561	0.0305388	2.99728e-06	0.892424	SLC25A19	Intergenic (nearest gene 99 bp away)	0.00654384
chr17	73285716	-0.152549	0.0305395	3.00297e-06	0.904966	SLC25A19	Intergenic (nearest gene 186 bp away)	0.00654876
chr17	73285718	-0.152508	0.0305419	3.02405e-06	0.905237	SLC25A19	Intergenic (nearest gene 188 bp away)	0.00658316
chr18	29264807	-0.152505	0.030542	3.02566e-06	0.897802	B4GALT6	Intergenic (nearest gene 121 bp away)	0.00658316
chr15	85291571	-0.152438	0.0305459	3.06015e-06	0.917657	ZNF592	Intergenic (nearest gene 246 bp away)	0.00665059
chr17	73285724	-0.152376	0.0305495	3.09262e-06	0.906047	SLC25A19	Intergenic (nearest gene 194 bp away)	0.00671349
chr7	32338815	-0.152348	0.0305511	3.10726e-06	0.884902	PDE1C	5_UTR	0.00673759
chr17	73285728	-0.152281	0.0305549	3.1428e-06	0.906583	SLC25A19	Intergenic (nearest gene 198 bp away)	0.00680691
chr15	85292242	-0.152273	0.0305553	3.14676e-06	0.925719	ZNF592	Intron	0.00680775
chr15	85291568	-0.152248	0.0305568	3.16034e-06	0.91766	ZNF592	Intergenic (nearest gene 249 bp away)	0.00682937
chr2	158733296	-0.15224	0.0305573	3.16466e-06	0.895824	ACVR1	Intergenic (nearest gene 922 bp away)	0.00683094
chr7	32338818	-0.152219	0.0305584	3.17572e-06	0.884975	PDE1C	5_UTR	0.00684705
chr17	73285731	-0.152206	0.0305592	3.18281e-06	0.906983	SLC25A19	Intergenic (nearest gene 201 bp away)	0.00685458
chr17	73285616	-0.152186	0.0305603	3.19356e-06	0.890422	SLC25A19	Intergenic (nearest gene 86 bp away)	0.00686997
chr17	73285733	-0.152154	0.0305621	3.21063e-06	0.907248	SLC25A19	Intergenic (nearest gene 203 bp away)	0.00689888
chr15	85291565	-0.152055	0.0305678	3.26461e-06	0.917663	ZNF592	Intergenic (nearest gene 252 bp away)	0.00700696
chr7	32338822	-0.152047	0.0305683	3.26917e-06	0.885072	PDE1C	5_UTR	0.00700884
chr17	73285609	-0.151935	0.0305747	3.33178e-06	0.88933	SLC25A19	Intergenic (nearest gene 79 bp away)	0.00713505
chr15	85291562	-0.151861	0.0305789	3.37316e-06	0.917665	ZNF592	Intergenic (nearest gene 255 bp away)	0.00721555
chr15	85291559	-0.151665	0.03059	3.48623e-06	0.917667	ZNF592	Intergenic (nearest gene 258 bp away)	0.00744435
chr15	41284136	0.151663	0.0305902	3.48794e-06	0.170464	INO80	Intron	0.00744435
chr15	41284164	0.15161	0.0305932	3.51896e-06	0.170368	INO80	Intron	0.00750214
chr17	73285753	-0.151573	0.0305953	3.54076e-06	0.909866	SLC25A19	Intergenic (nearest gene 223 bp away)	0.00754018
chr15	41284216	0.151512	0.0305988	3.57717e-06	0.170191	INO80	Intron	0.0076092
chr15	85291556	-0.151467	0.0306013	3.60424e-06	0.917667	ZNF592	Intergenic (nearest gene 261 bp away)	0.00765822
chr15	41284253	0.151443	0.0306027	3.61906e-06	0.170065	INO80	Intron	0.00768115
chr15	41284263	0.151424	0.0306038	3.63045e-06	0.170031	INO80	Intron	0.00769673
chr4	154388159	-0.151414	0.0306044	3.63684e-06	0.887769	TMEM131L	Intron	0.0077017
chr17	73285759	-0.151377	0.0306064	3.65902e-06	0.910638	SLC25A19	Intergenic (nearest gene 229 bp away)	0.00774007
chr15	85291553	-0.151267	0.0306127	3.72752e-06	0.917667	ZNF592	Intergenic (nearest gene 264 bp away)	0.00787621
chr17	73285766	-0.151138	0.0306201	3.80886e-06	0.91153	SLC25A19	Intergenic (nearest gene 236 bp away)	0.00803915
chr17	73285591	-0.151121	0.030621	3.81919e-06	0.886475	SLC25A19	Intergenic (nearest gene 61 bp away)	0.00805204
chr2	158733300	-0.151079	0.0306234	3.84616e-06	0.895142	ACVR1	Intergenic (nearest gene 926 bp away)	0.00809993
chr15	85292248	-0.150872	0.0306351	3.9817e-06	0.92588	ZNF592	Intron	0.00837081
chrX	399233	0.150856	0.030636	3.99247e-06	0.133433	PPP2R3B	Intergenic (nearest gene 51543 bp away)	0.00837081
chrX	399228	0.150853	0.0306362	3.99426e-06	0.133431	PPP2R3B	Intergenic (nearest gene 51538 bp away)	0.00837081
chrX	399225	0.150851	0.0306363	3.99533e-06	0.13343	PPP2R3B	Intergenic (nearest gene 51535 bp away)	0.00837081
chrX	399221	0.150849	0.0306364	3.99677e-06	0.133428	PPP2R3B	Intergenic (nearest gene 51531 bp away)	0.00837081
chrX	399201	0.150838	0.030637	4.00395e-06	0.13342	PPP2R3B	Intergenic (nearest gene 51511 bp away)	0.00837664
chrX	399169	0.150821	0.030638	4.0155e-06	0.133407	PPP2R3B	Intergenic (nearest gene 51479 bp away)	0.00839157
chr7	32338852	-0.150762	0.0306413	4.05503e-06	0.885784	PDE1C	5_UTR	0.0084649
chr17	73285779	-0.150663	0.0306469	4.12277e-06	0.913163	SLC25A19	Intergenic (nearest gene 249 bp away)	0.00859688
chr15	85291544	-0.150649	0.0306477	4.13213e-06	0.917663	ZNF592	Intergenic (nearest gene 273 bp away)	0.00860697
chr17	73285782	-0.150548	0.0306534	4.20211e-06	0.913536	SLC25A19	Intergenic (nearest gene 252 bp away)	0.00874316
chr11	10960052	-0.150358	0.0306642	4.3373e-06	0.602821	ZBED5-AS1	Intergenic (nearest gene 59229 bp away)	0.00901459
chr15	85291539	-0.150296	0.0306676	4.38201e-06	0.917657	ZNF592	Intergenic (nearest gene 278 bp away)	0.00909759
chr11	10960012	-0.150234	0.0306711	4.42713e-06	0.604055	ZBED5-AS1	Intergenic (nearest gene 59189 bp away)	0.00918126
chr11	10960003	-0.150206	0.0306727	4.44782e-06	0.604334	ZBED5-AS1	Intergenic (nearest gene 59180 bp away)	0.00921413
chr17	73285792	-0.150154	0.0306756	4.48631e-06	0.914767	SLC25A19	Intergenic (nearest gene 262 bp away)	0.00928376
chr15	85291534	-0.149935	0.030688	4.65213e-06	0.917649	ZNF592	Intergenic (nearest gene 283 bp away)	0.00961644
chr2	158733304	-0.149831	0.0306938	4.73216e-06	0.894422	ACVR1	Intergenic (nearest gene 930 bp away)	0.00977126
chr15	85291532	-0.149788	0.0306962	4.7663e-06	0.917646	ZNF592	Intergenic (nearest gene 285 bp away)	0.00982675
chr17	73285801	-0.149784	0.0306964	4.76935e-06	0.91586	SLC25A19	Intergenic (nearest gene 271 bp away)	0.00982675
chr15	85291529	-0.149565	0.0307087	4.94458e-06	0.917639	ZNF592	Intergenic (nearest gene 288 bp away)	0.0101768
chr15	85291524	-0.149187	0.0307298	5.26172e-06	0.917626	ZNF592	Intergenic (nearest gene 293 bp away)	0.0108178
chr3	40176281	0.149178	0.0307303	5.26969e-06	0.0872698	MYRIP	Intron	0.0108225
chr3	40176240	0.149142	0.0307323	5.30097e-06	0.0872755	MYRIP	Intron	0.010875
chr15	85292255	-0.149093	0.0307351	5.34355e-06	0.926061	ZNF592	Intron	0.0109506
chr3	40176154	0.149066	0.0307366	5.36725e-06	0.0872877	MYRIP	Intron	0.0109873
chr15	85291519	-0.1488	0.0307514	5.6062e-06	0.917611	ZNF592	Intergenic (nearest gene 298 bp away)	0.0114641
chr6	14223113	-0.148578	0.0307637	5.81258e-06	0.844035	LINC01108	Intergenic (nearest gene 57244 bp away)	0.0118734
chr3	40175589	0.148555	0.030765	5.83512e-06	0.0873738	MYRIP	Intron	0.0119067
chr3	40175572	0.148539	0.0307659	5.85014e-06	0.0873766	MYRIP	Intron	0.0119245
chr3	40175562	0.14853	0.0307664	5.85901e-06	0.0873782	MYRIP	Intron	0.0119298
chr3	40175555	0.148523	0.0307668	5.86523e-06	0.0873793	MYRIP	Intron	0.0119298
chr3	40175513	0.148484	0.0307689	5.90276e-06	0.0873862	MYRIP	Intron	0.0119933
chr6	14223182	-0.148435	0.0307717	5.95029e-06	0.843719	LINC01108	Intergenic (nearest gene 57175 bp away)	0.012077
chr6	14223196	-0.148406	0.0307733	5.97858e-06	0.843655	LINC01108	Intergenic (nearest gene 57161 bp away)	0.0121135
chr15	85291514	-0.148403	0.0307734	5.98102e-06	0.917591	ZNF592	Intergenic (nearest gene 303 bp away)	0.0121135
chr17	73285837	-0.148187	0.0307854	6.1947e-06	0.920097	SLC25A19	Intergenic (nearest gene 307 bp away)	0.0125329
chr4	154388153	-0.148133	0.0307884	6.25004e-06	0.888387	TMEM131L	Intron	0.0126315
chr17	73285839	-0.148094	0.0307905	6.28921e-06	0.920326	SLC25A19	Intergenic (nearest gene 309 bp away)	0.0126972
chr15	85291508	-0.147914	0.0308005	6.47564e-06	0.917563	ZNF592	Intergenic (nearest gene 309 bp away)	0.0130597
chr15	85291505	-0.147664	0.0308143	6.74323e-06	0.917547	ZNF592	Intergenic (nearest gene 312 bp away)	0.013585
chr3	126204890	0.147496	0.0308235	6.92916e-06	0.185467	UROC1	Intron	0.0139448
chr17	73285853	-0.147431	0.0308271	7.00169e-06	0.921912	SLC25A19	Intergenic (nearest gene 323 bp away)	0.0140759
chr15	85291502	-0.14741	0.0308282	7.02557e-06	0.91753	ZNF592	Intergenic (nearest gene 315 bp away)	0.014109
chr3	126204903	0.147196	0.03084	7.27204e-06	0.186836	UROC1	Intron	0.0145885
chr3	126204906	0.147126	0.0308438	7.3548e-06	0.187147	UROC1	Intron	0.0147391
chr2	158733313	-0.146692	0.0308676	7.88453e-06	0.892659	ACVR1	Intergenic (nearest gene 939 bp away)	0.015784
chr3	126204958	0.145949	0.030908	8.87766e-06	0.192147	UROC1	Intron	0.0177337
chr22	40390564	-0.145946	0.0309082	8.88103e-06	0.756981	FAM83F	Intergenic (nearest gene 388 bp away)	0.0177337
chr22	40390547	-0.145943	0.0309084	8.88641e-06	0.751321	FAM83F	Intergenic (nearest gene 405 bp away)	0.0177337
chr22	40390567	-0.145871	0.0309123	8.98797e-06	0.75793	FAM83F	Intergenic (nearest gene 385 bp away)	0.0179132
chr22	40390544	-0.145862	0.0309127	9.00067e-06	0.750273	FAM83F	Intergenic (nearest gene 408 bp away)	0.0179132
chr17	73285885	-0.145859	0.0309129	9.00457e-06	0.925419	SLC25A19	Intergenic (nearest gene 355 bp away)	0.0179132
chr1	205533180	-0.14584	0.0309139	9.0324e-06	0.886653	MFSD4A	Intergenic (nearest gene 4931 bp away)	0.0179498
chr15	41288613	0.145811	0.0309155	9.07363e-06	0.159477	INO80	Intron	0.0180124
chr15	41288623	0.145803	0.030916	9.0858e-06	0.159466	INO80	Intron	0.0180124
chr15	85291484	-0.145798	0.0309162	9.09225e-06	0.917389	ZNF592	Intergenic (nearest gene 333 bp away)	0.0180124
chr15	41288644	0.145785	0.0309169	9.11126e-06	0.159443	INO80	Intron	0.0180312
chr1	205533086	-0.145764	0.030918	9.14162e-06	0.885971	MFSD4A	Intergenic (nearest gene 5025 bp away)	0.0180607
chr15	41288676	0.145759	0.0309183	9.14981e-06	0.159409	INO80	Intron	0.0180607
chr15	41288680	0.145755	0.0309185	9.15461e-06	0.159405	INO80	Intron	0.0180607
chr4	42154708	-0.145601	0.0309269	9.38197e-06	0.861962	BEND4	5_UTR	0.0184901
chr22	40390536	-0.145526	0.0309309	9.49339e-06	0.747404	FAM83F	Intergenic (nearest gene 416 bp away)	0.018606
chr2	198380945	-0.14552	0.0309313	9.50252e-06	0.877805	MOB4	Intron	0.018606
chr2	198380937	-0.145518	0.0309314	9.50505e-06	0.878165	MOB4	Intron	0.018606
chr2	198380959	-0.145517	0.0309314	9.50767e-06	0.87717	MOB4	Intron	0.018606
chr2	198380964	-0.145513	0.0309316	9.51249e-06	0.876941	MOB4	Intron	0.018606
chr2	198380926	-0.145512	0.0309317	9.51492e-06	0.878656	MOB4	Intron	0.018606
chr2	198380922	-0.145508	0.0309319	9.52033e-06	0.878834	MOB4	Intron	0.018606
chr2	198380971	-0.145507	0.030932	9.52192e-06	0.87662	MOB4	Intron	0.018606
chr2	198380975	-0.145503	0.0309322	9.52872e-06	0.876435	MOB4	Intron	0.018606
chr2	198380910	-0.145494	0.0309327	9.54236e-06	0.879362	MOB4	Intron	0.0186135
chr2	198380995	-0.14547	0.030934	9.57843e-06	0.875503	MOB4	Intron	0.0186531
chr2	198380895	-0.145467	0.0309341	9.58228e-06	0.880015	MOB4	Intron	0.0186531
chr2	198380866	-0.145391	0.0309382	9.69823e-06	0.881249	MOB4	Coding_region	0.0188596
chr2	198380854	-0.145351	0.0309404	9.7609e-06	0.88175	MOB4	Coding_region	0.0189621
chr3	126204995	0.145339	0.030941	9.7787e-06	0.195159	UROC1	Intron	0.0189773
chr2	198380844	-0.145313	0.0309425	9.81961e-06	0.882163	MOB4	Coding_region	0.0190373
chr2	198380830	-0.145254	0.0309457	9.91166e-06	0.882733	MOB4	Coding_region	0.019188
chr1	205534359	-0.145249	0.0309459	9.91831e-06	0.894121	MFSD4A	Intergenic (nearest gene 3752 bp away)	0.019188
chr1	205534363	-0.145243	0.0309462	9.9276e-06	0.894142	MFSD4A	Intergenic (nearest gene 3748 bp away)	0.019188
chr15	85291478	-0.145225	0.0309472	9.95606e-06	0.917327	ZNF592	Intergenic (nearest gene 339 bp away)	0.0192235
chr2	198380821	-0.145212	0.0309479	9.97687e-06	0.883096	MOB4	Coding_region	0.0192442
chr1	205534395	-0.145195	0.0309488	1.00035e-05	0.894316	MFSD4A	Intergenic (nearest gene 3716 bp away)	0.0192759
chr1	205534419	-0.145158	0.0309508	1.00621e-05	0.894444	MFSD4A	Intergenic (nearest gene 3692 bp away)	0.0193693
chr1	205534427	-0.145146	0.0309515	1.0082e-05	0.894487	MFSD4A	Intergenic (nearest gene 3684 bp away)	0.019388
chr2	198380801	-0.14511	0.0309534	1.01387e-05	0.88389	MOB4	5_UTR	0.0194774
chr2	198380793	-0.145066	0.0309558	1.021e-05	0.884204	MOB4	5_UTR	0.0195945
chr2	198380783	-0.145007	0.0309589	1.03043e-05	0.884592	MOB4	5_UTR	0.0197556
chr2	198380776	-0.144965	0.0309612	1.03738e-05	0.884861	MOB4	5_UTR	0.0198689
chr2	198380764	-0.144888	0.0309654	1.04996e-05	0.885318	MOB4	Intron	0.0200897
chr2	198380754	-0.144821	0.030969	1.0611e-05	0.885695	MOB4	Intron	0.0202824
chr2	198380752	-0.144807	0.0309697	1.0634e-05	0.88577	MOB4	Intron	0.0203059
chr2	198380745	-0.144758	0.0309723	1.07163e-05	0.886031	MOB4	Intron	0.0204426
chr4	42154683	-0.144742	0.0309732	1.07426e-05	0.860773	BEND4	5_UTR	0.0204723
chr2	198380735	-0.144686	0.0309762	1.08389e-05	0.886401	MOB4	Intron	0.0206352
chr3	40172029	0.144671	0.030977	1.08647e-05	0.0882249	MYRIP	Intron	0.0206455
chr3	40172025	0.144665	0.0309773	1.08735e-05	0.0882263	MYRIP	Intron	0.0206455
chr2	198380732	-0.144663	0.0309774	1.08769e-05	0.886511	MOB4	Intron	0.0206455
chr3	40172013	0.14465	0.0309781	1.08999e-05	0.0882303	MYRIP	Intron	0.0206685
chr3	40171993	0.144624	0.0309795	1.0944e-05	0.0882371	MYRIP	Intron	0.0207315
chr2	198380725	-0.144611	0.0309803	1.09676e-05	0.886766	MOB4	Intron	0.0207556
chr3	40171969	0.144593	0.0309812	1.09973e-05	0.0882452	MYRIP	Intron	0.0207911
chr3	40171961	0.144583	0.0309817	1.10151e-05	0.088248	MYRIP	Intron	0.0208042
chr4	42154678	-0.144508	0.0309857	1.11448e-05	0.860554	BEND4	5_UTR	0.0210282
chr2	198380709	-0.144485	0.030987	1.1186e-05	0.887344	MOB4	Intron	0.0210851
chr2	198380699	-0.144403	0.0309914	1.13305e-05	0.8877	MOB4	Intron	0.0213364
chr15	40729326	-0.144392	0.030992	1.13491e-05	0.808364	IVD	Intergenic (nearest gene 1180 bp away)	0.0213503
chr2	198380681	-0.144249	0.0309996	1.16063e-05	0.888332	MOB4	Intron	0.0218125
chr2	198380678	-0.144223	0.031001	1.16542e-05	0.888437	MOB4	Intron	0.0218662
chr22	40390595	-0.144221	0.0310011	1.16578e-05	0.766085	FAM83F	Intergenic (nearest gene 357 bp away)	0.0218662
chr4	42154672	-0.144202	0.0310021	1.16922e-05	0.860299	BEND4	5_UTR	0.0219091
chr2	198380657	-0.144033	0.0310112	1.20059e-05	0.889157	MOB4	Intron	0.0224748
chr2	198380648	-0.143948	0.0310157	1.21653e-05	0.889461	MOB4	Intron	0.0227509
chr4	42154667	-0.143927	0.0310168	1.2206e-05	0.860095	BEND4	5_UTR	0.0228045
chr2	198380635	-0.143823	0.0310224	1.24051e-05	0.889895	MOB4	Intron	0.0231538
chr2	198380631	-0.143783	0.0310245	1.24812e-05	0.890028	MOB4	Intron	0.0232551
chr15	40729293	-0.143782	0.0310245	1.24838e-05	0.810153	IVD	Intergenic (nearest gene 1147 bp away)	0.0232551
chr15	85291463	-0.143704	0.0310287	1.2637e-05	0.917133	ZNF592	Intergenic (nearest gene 354 bp away)	0.0235174
chr2	198381233	-0.143636	0.0310323	1.27702e-05	0.863209	MOB4	Intron	0.0237422
chr22	40390602	-0.143581	0.0310353	1.28809e-05	0.76793	FAM83F	Intergenic (nearest gene 350 bp away)	0.0239247
chr4	42154660	-0.143512	0.0310389	1.30202e-05	0.859819	BEND4	5_UTR	0.0241597
chr2	198381250	-0.143396	0.0310451	1.32552e-05	0.862243	MOB4	Intron	0.0245718
chr4	42154803	-0.14332	0.0310491	1.34135e-05	0.867758	BEND4	5_UTR	0.0248412
chr2	198381256	-0.143308	0.0310498	1.34379e-05	0.861899	MOB4	Intron	0.0248622
chr18	22204964	0.143128	0.0310593	1.38175e-05	0.0704768	LINC01915	Intergenic (nearest gene 3181 bp away)	0.0255395
chr18	22204974	0.143095	0.031061	1.38874e-05	0.0704934	LINC01915	Intergenic (nearest gene 3171 bp away)	0.025644
chr18	22204977	0.143086	0.0310615	1.39085e-05	0.0704984	LINC01915	Intergenic (nearest gene 3168 bp away)	0.025658
chr4	42154653	-0.143064	0.0310627	1.39546e-05	0.859557	BEND4	5_UTR	0.0257182
chr12	53787856	-0.142866	0.0310732	1.43885e-05	0.692529	SP1	Intron	0.0264863
chr12	53787859	-0.142861	0.0310734	1.43993e-05	0.692476	SP1	Intron	0.0264863
chr4	42154649	-0.142795	0.0310769	1.45471e-05	0.859412	BEND4	5_UTR	0.0267324
chr12	53787923	-0.142751	0.0310792	1.46466e-05	0.691352	SP1	Intron	0.0268894
chr2	198381292	-0.142738	0.0310799	1.46751e-05	0.859803	MOB4	Intron	0.0269157
chr2	198381297	-0.142653	0.0310844	1.48675e-05	0.859507	MOB4	Intron	0.0272208
chr22	40390611	-0.142652	0.0310844	1.48701e-05	0.770192	FAM83F	Intergenic (nearest gene 341 bp away)	0.0272208
chr2	198381300	-0.142602	0.0310871	1.49856e-05	0.85933	MOB4	Intron	0.027406
chr15	40729233	-0.142479	0.0310936	1.52725e-05	0.813401	IVD	Intergenic (nearest gene 1087 bp away)	0.0279039
chr4	42154643	-0.142373	0.0310991	1.55218e-05	0.859204	BEND4	5_UTR	0.0283322
chr15	85291450	-0.142262	0.031105	1.57896e-05	0.916912	ZNF592	Intergenic (nearest gene 367 bp away)	0.0287933
chr22	40390615	-0.142206	0.0311079	1.59249e-05	0.771158	FAM83F	Intergenic (nearest gene 337 bp away)	0.0290123
chr22	38240454	-0.142104	0.0311133	1.61772e-05	0.839707	ANKRD54	3_UTR	0.0294438
chr22	40390617	-0.141976	0.03112	1.64957e-05	0.771633	FAM83F	Intergenic (nearest gene 335 bp away)	0.0299948
chr2	198381335	-0.141967	0.0311205	1.6518e-05	0.857226	MOB4	Intron	0.0300067
chr22	38240438	-0.141893	0.0311243	1.67065e-05	0.847178	ANKRD54	3_UTR	0.0303201
chr15	40729204	-0.141758	0.0311314	1.70562e-05	0.81496	IVD	Intergenic (nearest gene 1058 bp away)	0.0309254
chr15	85292279	-0.14164	0.0311376	1.73652e-05	0.9266	ZNF592	Intron	0.0314557
chr4	42154632	-0.141553	0.0311422	1.75975e-05	0.858848	BEND4	5_UTR	0.0318462
chr2	198381362	-0.141434	0.0311484	1.79192e-05	0.855567	MOB4	Intron	0.0323951
chr15	85291443	-0.141428	0.0311487	1.79349e-05	0.91677	ZNF592	Intergenic (nearest gene 374 bp away)	0.0323951
chr17	73285489	-0.141385	0.0311509	1.80532e-05	0.869009	SLC25A19	5_UTR	0.032578
chr15	40729186	-0.14128	0.0311564	1.83431e-05	0.815922	IVD	Intergenic (nearest gene 1040 bp away)	0.0330698
chr12	53788491	-0.141202	0.0311605	1.85618e-05	0.681418	SP1	Intron	0.0334323
chr17	73285487	-0.141103	0.0311656	1.88416e-05	0.868644	SLC25A19	5_UTR	0.0339043
chr12	53788523	-0.141084	0.0311666	1.88963e-05	0.68086	SP1	Intron	0.0339707
chr19	45251310	-0.141065	0.0311676	1.89507e-05	0.840876	BCL3	Intergenic (nearest gene 667 bp away)	0.0340362
chr12	53788543	-0.141009	0.0311705	1.9113e-05	0.680511	SP1	Intron	0.0342955
chr7	27279101	-0.140852	0.0311787	1.95726e-05	0.802993	EVX1-AS	Intergenic (nearest gene 1946 bp away)	0.035087
chr7	27279090	-0.140817	0.0311805	1.96779e-05	0.802326	EVX1-AS	Intergenic (nearest gene 1957 bp away)	0.0352426
chr7	27279086	-0.140784	0.0311822	1.97763e-05	0.802077	EVX1-AS	Intergenic (nearest gene 1961 bp away)	0.0353855
chr7	27279081	-0.140729	0.0311851	1.99413e-05	0.801759	EVX1-AS	Intergenic (nearest gene 1966 bp away)	0.0356428
chr7	27279118	-0.140723	0.0311853	1.99575e-05	0.803964	EVX1-AS	Intergenic (nearest gene 1929 bp away)	0.0356428
chr13	113998952	0.140711	0.0311859	1.99931e-05	0.168322	GRTP1	Intron	0.035673
chr7	27279120	-0.140692	0.031187	2.00536e-05	0.804074	EVX1-AS	Intergenic (nearest gene 1927 bp away)	0.0357473
chr7	27279123	-0.140637	0.0311898	2.02205e-05	0.804236	EVX1-AS	Intergenic (nearest gene 1924 bp away)	0.0360112
chr13	114000460	0.140623	0.0311905	2.02618e-05	0.140884	GRTP1	Intron	0.0360509
chr7	27279067	-0.140501	0.0311968	2.06371e-05	0.800837	EVX1-AS	Intergenic (nearest gene 1980 bp away)	0.0366845
chr7	27279065	-0.140461	0.0311989	2.07634e-05	0.800702	EVX1-AS	Intergenic (nearest gene 1982 bp away)	0.0368744
chr7	27279131	-0.140446	0.0311997	2.08113e-05	0.804659	EVX1-AS	Intergenic (nearest gene 1916 bp away)	0.0369252
chr22	40390630	-0.140384	0.0312029	2.10052e-05	0.774576	FAM83F	Intergenic (nearest gene 322 bp away)	0.0372344
chr13	114000490	0.14035	0.0312047	2.11149e-05	0.139994	GRTP1	Intron	0.0373941
chr13	113998884	0.140332	0.0312056	2.11696e-05	0.168724	GRTP1	Intron	0.0374409
chr7	27279059	-0.140329	0.0312058	2.11807e-05	0.800289	EVX1-AS	Intergenic (nearest gene 1988 bp away)	0.0374409
chr7	27279137	-0.140257	0.0312095	2.14113e-05	0.804967	EVX1-AS	Intergenic (nearest gene 1910 bp away)	0.0378134
chr7	44349301	-0.140127	0.0312162	2.18343e-05	0.879437	CAMK2B	Intron	0.0385186
chr4	42154840	-0.140122	0.0312165	2.1851e-05	0.870416	BEND4	5_UTR	0.0385186
chr13	114000520	0.140046	0.0312204	2.21014e-05	0.139096	GRTP1	Intron	0.038924
chr19	45251284	-0.140036	0.0312209	2.21326e-05	0.839651	BCL3	Intergenic (nearest gene 693 bp away)	0.0389428
chr5	137692830	-0.13998	0.0312238	2.23216e-05	0.778131	KDM3B	Intron	0.0392391
chr5	137692824	-0.139954	0.0312251	2.24083e-05	0.778309	KDM3B	Intron	0.0393551
chr4	154388139	-0.139915	0.0312271	2.25391e-05	0.889746	TMEM131L	Intron	0.0395483
chr7	44349299	-0.139808	0.0312326	2.29031e-05	0.879348	CAMK2B	Intron	0.04015
chr13	114000550	0.139709	0.0312377	2.3245e-05	0.138189	GRTP1	Intron	0.040712
chr19	45251274	-0.139629	0.0312418	2.35251e-05	0.839171	BCL3	Intergenic (nearest gene 703 bp away)	0.0411647
chr5	137692751	-0.139614	0.0312426	2.35781e-05	0.780466	KDM3B	Intron	0.0412196
chr22	40390636	-0.139602	0.0312432	2.36214e-05	0.775853	FAM83F	Intergenic (nearest gene 316 bp away)	0.0412573
chr7	27279153	-0.139538	0.0312465	2.38461e-05	0.805744	EVX1-AS	Intergenic (nearest gene 1894 bp away)	0.0416117
chr13	114000568	0.13949	0.0312489	2.40183e-05	0.137641	GRTP1	Intron	0.0418518
chr20	20033143	0.139488	0.0312491	2.40277e-05	0.849442	CRNKL1	Coding_region	0.0418518
chr20	20033134	0.139453	0.0312509	2.41529e-05	0.849517	CRNKL1	Coding_region	0.0420315
chr13	114000580	0.139337	0.0312568	2.45746e-05	0.137274	GRTP1	Intron	0.0426947
chr22	40390638	-0.139336	0.0312569	2.45789e-05	0.776268	FAM83F	Intergenic (nearest gene 314 bp away)	0.0426947
chr7	27279024	-0.139296	0.0312589	2.47232e-05	0.797709	EVX1-AS	Intergenic (nearest gene 2023 bp away)	0.0428795
chr20	20033104	0.139294	0.031259	2.47303e-05	0.849765	CRNKL1	Coding_region	0.0428795
chr20	20033098	0.139255	0.031261	2.48743e-05	0.849814	CRNKL1	Coding_region	0.0430578
chr4	42154604	-0.139254	0.031261	2.48784e-05	0.858094	BEND4	5_UTR	0.0430578
chr15	40730053	-0.139231	0.0312622	2.49641e-05	0.766405	BAHD1	Intergenic (nearest gene 1866 bp away)	0.0431669
chr20	20033092	0.139214	0.0312631	2.50274e-05	0.849862	CRNKL1	Coding_region	0.0432266
chrX	153094069	-0.13921	0.0312633	2.50441e-05	0.804766	PDZD4	Intron	0.0432266
chr19	11308675	-0.1392	0.0312638	2.50797e-05	0.802859	KANK2	Intergenic (nearest gene 432 bp away)	0.0432281
chr12	53785558	-0.139193	0.0312642	2.51087e-05	0.733001	SP1	Intron	0.0432281
chr7	27279021	-0.139191	0.0312643	2.5113e-05	0.797474	EVX1-AS	Intergenic (nearest gene 2026 bp away)	0.0432281
chr7	44349295	-0.13917	0.0312654	2.51932e-05	0.879169	CAMK2B	Intron	0.0433269
chr20	20033276	0.139108	0.0312685	2.54275e-05	0.848265	CRNKL1	Coding_region	0.0436904
chr12	53785533	-0.139092	0.0312693	2.54865e-05	0.733431	SP1	Intron	0.0437523
chr15	85291425	-0.139074	0.0312703	2.55563e-05	0.916327	ZNF592	Intergenic (nearest gene 392 bp away)	0.0438326
chr13	114000602	0.139039	0.031272	2.5688e-05	0.136599	GRTP1	Intron	0.0440189
chr9	504042	-0.139027	0.0312727	2.57343e-05	0.873258	KANK1	Intron	0.0440586
chrX	153094075	-0.139018	0.0312731	2.5769e-05	0.804277	PDZD4	Intron	0.0440783
chr20	20033286	0.138996	0.0312743	2.5854e-05	0.848171	CRNKL1	Coding_region	0.0441449
chr4	42154601	-0.138996	0.0312743	2.58543e-05	0.858026	BEND4	5_UTR	0.0441449
chr17	73408740	-0.138984	0.0312749	2.58994e-05	0.622768	MIR3678	Intergenic (nearest gene 6497 bp away)	0.0441822
chr9	504047	-0.138953	0.0312765	2.60208e-05	0.873436	KANK1	Intron	0.0443496
chr22	40390641	-0.138932	0.0312775	2.61009e-05	0.77688	FAM83F	Intergenic (nearest gene 311 bp away)	0.0443563
chr20	20033056	0.138923	0.031278	2.61333e-05	0.85015	CRNKL1	Coding_region	0.0443563
chr12	53785489	-0.138914	0.0312784	2.61707e-05	0.734187	SP1	Intron	0.0443563
chr15	44829397	-0.138894	0.0312794	2.62468e-05	0.861972	EIF3J	Coding_region	0.0443563
chr15	44829389	-0.138894	0.0312795	2.62496e-05	0.861502	EIF3J	5_UTR	0.0443563
chr15	44829400	-0.138891	0.0312796	2.62589e-05	0.862147	EIF3J	Coding_region	0.0443563
chr9	504051	-0.138891	0.0312796	2.62595e-05	0.873578	KANK1	Intron	0.0443563
chr12	53785483	-0.138889	0.0312797	2.62659e-05	0.73429	SP1	Intron	0.0443563
chr15	44829384	-0.138886	0.0312798	2.62774e-05	0.861205	EIF3J	5_UTR	0.0443563
chr15	44829403	-0.138886	0.0312799	2.62781e-05	0.862321	EIF3J	Coding_region	0.0443563
chr20	20033295	0.138883	0.03128	2.62903e-05	0.848087	CRNKL1	Coding_region	0.0443563
chr15	44829406	-0.13888	0.0312802	2.63043e-05	0.862494	EIF3J	Coding_region	0.0443563
chr15	44829409	-0.138871	0.0312806	2.63377e-05	0.862666	EIF3J	Coding_region	0.0443733
chr15	44829412	-0.138861	0.0312812	2.63781e-05	0.862838	EIF3J	Coding_region	0.0443895
chr15	44829374	-0.138857	0.0312814	2.6394e-05	0.860604	EIF3J	5_UTR	0.0443895
chr15	44829415	-0.138849	0.0312818	2.64256e-05	0.863008	EIF3J	Coding_region	0.0444035
chr15	44829424	-0.138802	0.0312842	2.66103e-05	0.863515	EIF3J	Coding_region	0.0446744
chr7	27279010	-0.13879	0.0312848	2.66578e-05	0.796596	EVX1-AS	Intergenic (nearest gene 2037 bp away)	0.0447147
chr9	504059	-0.138763	0.0312861	2.67624e-05	0.873862	KANK1	Intron	0.0448136
chr20	20033039	0.138763	0.0312862	2.67638e-05	0.850283	CRNKL1	Coding_region	0.0448136
chr15	44829352	-0.138717	0.0312885	2.69453e-05	0.859252	EIF3J	5_UTR	0.0450779
chr20	20033029	0.138662	0.0312913	2.71663e-05	0.85036	CRNKL1	Coding_region	0.0453826
chr22	40390643	-0.13866	0.0312914	2.71752e-05	0.777282	FAM83F	Intergenic (nearest gene 309 bp away)	0.0453826
chr17	73403248	-0.138644	0.0312922	2.72385e-05	0.749657	MIR3678	Intergenic (nearest gene 1005 bp away)	0.0454484
chr20	20033025	0.138621	0.0312934	2.73337e-05	0.850391	CRNKL1	Coding_region	0.0455675
chr20	20033315	0.13859	0.0312949	2.74563e-05	0.847897	CRNKL1	Coding_region	0.0456755
chr17	73408897	-0.138587	0.0312951	2.74696e-05	0.620436	MIR3678	Intergenic (nearest gene 6654 bp away)	0.0456755
chr15	44829339	-0.138587	0.0312951	2.74705e-05	0.858433	EIF3J	5_UTR	0.0456755
chr17	73285470	-0.138578	0.0312956	2.75084e-05	0.865507	SLC25A19	5_UTR	0.0456986
chr20	20033020	0.138568	0.0312961	2.75482e-05	0.85043	CRNKL1	Coding_region	0.0457249
chr15	44829336	-0.138552	0.0312969	2.76137e-05	0.858243	EIF3J	5_UTR	0.0457936
chr17	73408916	-0.138533	0.0312978	2.76896e-05	0.620157	MIR3678	Intergenic (nearest gene 6673 bp away)	0.0458796
chr13	114000638	0.138503	0.0312994	2.7812e-05	0.135484	GRTP1	Intron	0.0460422
chr15	85291421	-0.138492	0.0312999	2.78574e-05	0.916224	ZNF592	Intergenic (nearest gene 396 bp away)	0.0460773
chr3	107517853	0.138456	0.0313018	2.80059e-05	0.317692	BBX	Intron	0.0462827
chr22	38240408	-0.138427	0.0313032	2.81278e-05	0.859637	ANKRD54	3_UTR	0.0464349
chr15	44829463	-0.138422	0.0313035	2.81468e-05	0.865618	EIF3J	Intron	0.0464349
chr3	107517913	0.138416	0.0313038	2.8174e-05	0.317776	BBX	Intron	0.0464365
chr3	107517921	0.13841	0.0313041	2.81965e-05	0.317787	BBX	Intron	0.0464365
chr14	95679223	0.13836	0.0313067	2.84083e-05	0.141879	CLMN	Intron	0.0467449
chr20	20032999	0.138335	0.0313079	2.85115e-05	0.850589	CRNKL1	Coding_region	0.0468742
chr15	44829474	-0.138267	0.0313114	2.8801e-05	0.866183	EIF3J	Intron	0.0473093
chr9	504089	-0.13823	0.0313133	2.89586e-05	0.874915	KANK1	Intron	0.0475271
chr13	114000656	0.138211	0.0313142	2.90385e-05	0.134924	GRTP1	Intron	0.0475977
chr7	27278995	-0.138208	0.0313144	2.90516e-05	0.795353	EVX1-AS	Intergenic (nearest gene 2052 bp away)	0.0475977
chr18	29264782	-0.138183	0.0313156	2.91601e-05	0.894096	B4GALT6	Intergenic (nearest gene 96 bp away)	0.0477344
chr14	95679247	0.13817	0.0313163	2.92149e-05	0.141976	CLMN	Intron	0.0477523
chr15	44829310	-0.138169	0.0313164	2.92212e-05	0.856558	EIF3J	5_UTR	0.0477523
chr15	44829482	-0.138141	0.0313178	2.93401e-05	0.866586	EIF3J	Intron	0.0479054
chr9	504094	-0.138133	0.0313182	2.93736e-05	0.87509	KANK1	Intron	0.0479071
chr7	27279173	-0.138124	0.0313186	2.94157e-05	0.806632	EVX1-AS	Intergenic (nearest gene 1874 bp away)	0.0479071
chr20	20032981	0.138123	0.0313187	2.94166e-05	0.850724	CRNKL1	Coding_region	0.0479071
chr22	40390647	-0.13811	0.0313193	2.94745e-05	0.778068	FAM83F	Intergenic (nearest gene 305 bp away)	0.0479204
chr13	114000662	0.13811	0.0313193	2.94751e-05	0.134736	GRTP1	Intron	0.0479204
chr15	44829303	-0.138042	0.0313228	2.97727e-05	0.856096	EIF3J	5_UTR	0.048363
chr20	20032971	0.138001	0.0313249	2.99507e-05	0.850799	CRNKL1	Coding_region	0.0486107
chr14	95679271	0.137982	0.0313258	3.00372e-05	0.142073	CLMN	Intron	0.0487054
chr20	20032969	0.137976	0.0313261	3.00603e-05	0.850813	CRNKL1	Coding_region	0.0487054
chr7	27279175	-0.137946	0.0313277	3.01954e-05	0.806716	EVX1-AS	Intergenic (nearest gene 1872 bp away)	0.0488828
chr20	20032965	0.137926	0.0313286	3.0282e-05	0.850843	CRNKL1	Coding_region	0.0489812
chr14	95679279	0.137919	0.031329	3.03149e-05	0.142105	CLMN	Intron	0.0489929
chr14	95679283	0.137888	0.0313306	3.04544e-05	0.142121	CLMN	Intron	0.0491766
chr3	107518701	0.137875	0.0313312	3.05103e-05	0.318688	BBX	Intron	0.0492251
chr4	42154588	-0.137859	0.0313321	3.05854e-05	0.857761	BEND4	5_UTR	0.0492634
chr9	504108	-0.137852	0.0313324	3.06128e-05	0.875578	KANK1	Intron	0.0492634
chr22	38240500	-0.137844	0.0313328	3.0649e-05	0.814554	ANKRD54	Intron	0.0492634
chr22	38240405	-0.137843	0.0313329	3.06574e-05	0.86078	ANKRD54	3_UTR	0.0492634
chr6	168963674	0.137841	0.0313329	3.06634e-05	0.148084	SMOC2	Intron	0.0492634
chr19	11308593	-0.13781	0.0313345	3.08053e-05	0.804699	KANK2	Intergenic (nearest gene 350 bp away)	0.0494497
chr20	20032955	0.1378	0.0313351	3.08517e-05	0.850916	CRNKL1	Coding_region	0.0494824
chr15	44829502	-0.137783	0.0313359	3.09282e-05	0.867565	EIF3J	Intron	0.0495634
chr7	27279177	-0.137761	0.031337	3.10271e-05	0.806799	EVX1-AS	Intergenic (nearest gene 1870 bp away)	0.04968
chr6	168963659	0.137754	0.0313373	3.1058e-05	0.148076	SMOC2	Intron	0.0496877
chr22	40390650	-0.137693	0.0313404	3.13381e-05	0.778645	FAM83F	Intergenic (nearest gene 302 bp away)	0.0500937
chr15	44829507	-0.137684	0.0313409	3.13807e-05	0.867803	EIF3J	Intron	0.0501198
chr7	27278980	-0.13764	0.0313431	3.15831e-05	0.794054	EVX1-AS	Intergenic (nearest gene 2067 bp away)	0.0504008
chr19	11308581	-0.137598	0.0313452	3.17767e-05	0.804963	KANK2	Intergenic (nearest gene 338 bp away)	0.0506671
chr13	114000692	0.137574	0.0313465	3.18917e-05	0.133796	GRTP1	Intron	0.0507555
chr7	44349285	-0.137568	0.0313467	3.19157e-05	0.878718	CAMK2B	Intron	0.0507555
chr4	42153625	-0.137564	0.031347	3.19376e-05	0.872455	BEND4	Intron	0.0507555
chrX	153094110	-0.137563	0.031347	3.19388e-05	0.801362	PDZD4	Intron	0.0507555
chr5	85058525	0.137529	0.0313487	3.21021e-05	0.0682378	NBPF22P	Intergenic (nearest gene 519736 bp away)	0.0508359
chr5	85058427	0.137527	0.0313488	3.2112e-05	0.0682379	NBPF22P	Intergenic (nearest gene 519834 bp away)	0.0508359
chr5	85058381	0.137526	0.0313489	3.21168e-05	0.068238	NBPF22P	Intergenic (nearest gene 519880 bp away)	0.0508359
chr4	42153634	-0.137525	0.0313489	3.21209e-05	0.872343	BEND4	Intron	0.0508359
chr5	85058322	0.137524	0.031349	3.21229e-05	0.068238	NBPF22P	Intergenic (nearest gene 519939 bp away)	0.0508359
chr4	42153600	-0.137509	0.0313497	3.21959e-05	0.872805	BEND4	Intron	0.0509092
chr4	42153638	-0.137498	0.0313503	3.22469e-05	0.872295	BEND4	Intron	0.0509475
chr15	44829517	-0.137475	0.0313514	3.23548e-05	0.868271	EIF3J	Intron	0.0510707
chr17	73285463	-0.13747	0.0313517	3.23785e-05	0.864196	SLC25A19	5_UTR	0.0510707
chr20	20032929	0.137458	0.0313523	3.24367e-05	0.851104	CRNKL1	Intron	0.0510865
chr4	42153643	-0.137457	0.0313524	3.24422e-05	0.872238	BEND4	Intron	0.0510865
chr4	42153592	-0.137436	0.0313534	3.25386e-05	0.87293	BEND4	Intron	0.0511959
chr20	20032925	0.137404	0.031355	3.26937e-05	0.851133	CRNKL1	Intron	0.0513695
chr4	42153589	-0.137402	0.0313551	3.27028e-05	0.872978	BEND4	Intron	0.0513695
chr20	20032923	0.137377	0.0313564	3.28236e-05	0.851147	CRNKL1	Intron	0.0515166
chr9	504133	-0.137315	0.0313595	3.31222e-05	0.876448	KANK1	Intron	0.0519425
chrX	153094115	-0.137304	0.0313601	3.31767e-05	0.800935	PDZD4	Intron	0.0519852
chr19	11308563	-0.137277	0.0313614	3.33059e-05	0.805356	KANK2	Intergenic (nearest gene 320 bp away)	0.0521446
chr4	42153660	-0.137254	0.0313626	3.34175e-05	0.872056	BEND4	Intron	0.0522764
chr5	80050785	0.137116	0.0313695	3.40968e-05	0.11145	MSH3	Intron	0.0532953
chr6	168963539	0.137099	0.0313703	3.41827e-05	0.148	SMOC2	Intron	0.0533857
chr19	11308551	-0.13706	0.0313723	3.43758e-05	0.805617	KANK2	Intergenic (nearest gene 308 bp away)	0.0536433
chr6	168963529	0.137048	0.0313729	3.44376e-05	0.147993	SMOC2	Intron	0.0536903
chr4	42153568	-0.137043	0.0313732	3.44623e-05	0.873343	BEND4	Intron	0.0536903
chr9	504146	-0.137018	0.0313744	3.45897e-05	0.8769	KANK1	Intron	0.0538447
chr15	44829538	-0.136993	0.0313757	3.47133e-05	0.869218	EIF3J	Coding_region	0.053993
chr4	42153677	-0.136961	0.0313773	3.48751e-05	0.871897	BEND4	Coding_region	0.0542003
chr9	504149	-0.136946	0.031378	3.49515e-05	0.877005	KANK1	Intron	0.0542746
chr4	42153563	-0.136926	0.031379	3.50571e-05	0.873438	BEND4	Intron	0.0543686
chr6	168963504	0.136923	0.0313792	3.50691e-05	0.147974	SMOC2	Intron	0.0543686
chr22	38240506	-0.136888	0.031381	3.52522e-05	0.810833	ANKRD54	Intron	0.054608
chr6	168963495	0.136879	0.0313814	3.52941e-05	0.147967	SMOC2	Intron	0.0546285
chr22	40390656	-0.136849	0.0313829	3.54503e-05	0.779762	FAM83F	Intergenic (nearest gene 296 bp away)	0.0548257
chr6	169011942	0.136818	0.0313845	3.56127e-05	0.117893	SMOC2	Intron	0.0549361
chr6	169011952	0.136816	0.0313846	3.56227e-05	0.117926	SMOC2	Intron	0.0549361
chr6	169011961	0.136814	0.0313847	3.56319e-05	0.117957	SMOC2	Intron	0.0549361
chr6	169011966	0.136813	0.0313847	3.56371e-05	0.117974	SMOC2	Intron	0.0549361
chr6	169012049	0.136795	0.0313856	3.57313e-05	0.118256	SMOC2	Intron	0.0549619
chr6	169012088	0.136785	0.0313861	3.57809e-05	0.118389	SMOC2	Intron	0.0549619
chr6	169012098	0.136783	0.0313862	3.57942e-05	0.118423	SMOC2	Intron	0.0549619
chr6	169012107	0.13678	0.0313863	3.58064e-05	0.118454	SMOC2	Intron	0.0549619
chr6	169012112	0.136779	0.0313864	3.58132e-05	0.118471	SMOC2	Intron	0.0549619
chr6	169012122	0.136776	0.0313865	3.5827e-05	0.118506	SMOC2	Intron	0.0549619
chr6	169012161	0.136766	0.0313871	3.58833e-05	0.11864	SMOC2	Intron	0.0550038
chr6	169012234	0.136744	0.0313882	3.59984e-05	0.118891	SMOC2	Intron	0.0550506
chr6	169012253	0.136737	0.0313885	3.60305e-05	0.118957	SMOC2	Intron	0.0550506
chr6	169012258	0.136736	0.0313886	3.60391e-05	0.118974	SMOC2	Intron	0.0550506
chr6	169012268	0.136733	0.0313887	3.60565e-05	0.119009	SMOC2	Intron	0.0550506
chr6	168963464	0.136732	0.0313887	3.60584e-05	0.147942	SMOC2	Intron	0.0550506
chr4	42153555	-0.136711	0.0313898	3.61714e-05	0.873595	BEND4	Intron	0.0551789
chr19	11308531	-0.136695	0.0313906	3.62541e-05	0.806049	KANK2	Intergenic (nearest gene 288 bp away)	0.0552607
chr6	168963448	0.136659	0.0313924	3.64455e-05	0.147929	SMOC2	Intron	0.0555081
chr19	11308528	-0.13664	0.0313934	3.65465e-05	0.806113	KANK2	Intergenic (nearest gene 285 bp away)	0.0556173
chr6	168963433	0.136591	0.0313958	3.68034e-05	0.147916	SMOC2	Intron	0.0559325
chr15	44829554	-0.13659	0.0313959	3.68129e-05	0.869907	EIF3J	Coding_region	0.0559325
chr19	11308525	-0.136584	0.0313962	3.68417e-05	0.806177	KANK2	Intergenic (nearest gene 282 bp away)	0.0559325
chr9	504164	-0.136568	0.0313969	3.69261e-05	0.877531	KANK1	Intron	0.0559392
chr6	168963427	0.136565	0.0313971	3.69451e-05	0.147911	SMOC2	Intron	0.0559392
chr4	42153695	-0.136562	0.0313973	3.69615e-05	0.871749	BEND4	Coding_region	0.0559392
chr20	20032865	0.13656	0.0313974	3.69702e-05	0.851552	CRNKL1	Intron	0.0559392
chr4	42153550	-0.136556	0.0313976	3.6993e-05	0.8737	BEND4	Intron	0.0559392
chr13	114000744	0.136515	0.0313996	3.72161e-05	0.132152	GRTP1	Intron	0.0562319
chr19	11308520	-0.136492	0.0314008	3.73402e-05	0.806284	KANK2	Intergenic (nearest gene 277 bp away)	0.0563747
chr4	42153701	-0.13641	0.0314049	3.77868e-05	0.871704	BEND4	Coding_region	0.0570037
chr5	80050837	0.136401	0.0314053	3.78332e-05	0.111096	MSH3	Intron	0.0570041
chr19	11308515	-0.136399	0.0314054	3.78469e-05	0.806391	KANK2	Intergenic (nearest gene 272 bp away)	0.0570041
chr6	168963376	0.13635	0.0314078	3.81118e-05	0.147864	SMOC2	Intron	0.0573576
chr6	168963358	0.136278	0.0314114	3.85109e-05	0.147847	SMOC2	Intron	0.0579125
chr19	11308508	-0.136268	0.031412	3.85703e-05	0.806541	KANK2	Intergenic (nearest gene 265 bp away)	0.057956
chr4	42153708	-0.13622	0.0314143	3.88355e-05	0.871653	BEND4	Coding_region	0.0583084
chr15	44829568	-0.136212	0.0314147	3.88805e-05	0.870487	EIF3J	Coding_region	0.0583301
chr2	24300551	-0.136182	0.0314162	3.90507e-05	0.90862	TP53I3	Coding_region	0.0585393
chr19	11308503	-0.136174	0.0314166	3.90972e-05	0.806647	KANK2	Intergenic (nearest gene 260 bp away)	0.0585628
chr17	73285455	-0.136158	0.0314174	3.91847e-05	0.862685	SLC25A19	5_UTR	0.0586252
chr9	504179	-0.136156	0.0314175	3.92004e-05	0.878066	KANK1	Intron	0.0586252
chr18	55710858	-0.13614	0.0314183	3.92906e-05	0.876684	NEDD4L	Intergenic (nearest gene 751 bp away)	0.058714
chr18	55710854	-0.136129	0.0314189	3.93512e-05	0.876577	NEDD4L	Intergenic (nearest gene 755 bp away)	0.058715
chr15	44829571	-0.136129	0.0314189	3.9353e-05	0.870609	EIF3J	Coding_region	0.058715
chr18	55710849	-0.136106	0.03142	3.94827e-05	0.876443	NEDD4L	Intergenic (nearest gene 760 bp away)	0.0588624
chr4	42153713	-0.136078	0.0314214	3.96432e-05	0.871619	BEND4	Coding_region	0.0590555
chr4	42153716	-0.135989	0.0314258	4.01533e-05	0.871599	BEND4	Coding_region	0.0597686
chr6	169007878	0.135973	0.0314266	4.02497e-05	0.106056	SMOC2	Intron	0.0598652
chr6	169007846	0.135962	0.0314272	4.03142e-05	0.105978	SMOC2	Intron	0.0599145
chr6	169007780	0.135939	0.0314283	4.04488e-05	0.105817	SMOC2	Intron	0.0600299
chr6	169007777	0.135938	0.0314284	4.0455e-05	0.10581	SMOC2	Intron	0.0600299
chr9	504188	-0.135892	0.0314307	4.07227e-05	0.878392	KANK1	Intron	0.0603332
chr4	42153533	-0.135892	0.0314307	4.07228e-05	0.874102	BEND4	Intron	0.0603332
chr15	44829580	-0.135873	0.0314316	4.08351e-05	0.870967	EIF3J	Coding_region	0.0603659
chr18	55710902	-0.135863	0.0314321	4.08944e-05	0.87778	NEDD4L	Intergenic (nearest gene 707 bp away)	0.0603659
chr5	85101466	0.135861	0.0314322	4.09051e-05	0.0685202	NBPF22P	Intergenic (nearest gene 476795 bp away)	0.0603659
chr5	85101556	0.135854	0.0314326	4.09472e-05	0.0685209	NBPF22P	Intergenic (nearest gene 476705 bp away)	0.0603659
chr5	85101582	0.135852	0.0314327	4.09593e-05	0.0685211	NBPF22P	Intergenic (nearest gene 476679 bp away)	0.0603659
chr1	205537783	-0.135851	0.0314327	4.09629e-05	0.90451	MFSD4A	Intergenic (nearest gene 328 bp away)	0.0603659
chr5	85101598	0.13585	0.0314327	4.09668e-05	0.0685212	NBPF22P	Intergenic (nearest gene 476663 bp away)	0.0603659
chr19	11308485	-0.135833	0.0314336	4.10666e-05	0.807028	KANK2	Intergenic (nearest gene 242 bp away)	0.0604662
chr4	42153722	-0.135805	0.031435	4.12326e-05	0.871559	BEND4	Coding_region	0.0606636
chr4	42153531	-0.135799	0.0314353	4.12696e-05	0.874154	BEND4	Intron	0.0606713
chr15	44829583	-0.135785	0.0314359	4.13512e-05	0.871084	EIF3J	Coding_region	0.0607442
chr18	55710909	-0.135762	0.0314371	4.14892e-05	0.877943	NEDD4L	Intergenic (nearest gene 700 bp away)	0.0608999
chr7	27279195	-0.13575	0.0314377	4.15603e-05	0.807506	EVX1-AS	Intergenic (nearest gene 1852 bp away)	0.0609573
chr1	205537817	-0.135741	0.0314381	4.16142e-05	0.904546	MFSD4A	Intergenic (nearest gene 294 bp away)	0.0609894
chr15	53041275	0.135736	0.0314384	4.16466e-05	0.159638	ONECUT1	Intergenic (nearest gene 5975 bp away)	0.0609899
chr12	27397608	-0.135719	0.0314392	4.17471e-05	0.849632	STK38L	Intron	0.0610771
chr2	24300523	-0.135712	0.0314396	4.17902e-05	0.90852	TP53I3	Coding_region	0.0610771
chr4	42153725	-0.13571	0.0314397	4.18023e-05	0.87154	BEND4	Coding_region	0.0610771
chr1	205537833	-0.13569	0.0314407	4.19238e-05	0.904563	MFSD4A	Intergenic (nearest gene 278 bp away)	0.0612076
chr1	205537837	-0.135677	0.0314413	4.20015e-05	0.904568	MFSD4A	Intergenic (nearest gene 274 bp away)	0.0612403
chr12	27397597	-0.135676	0.0314414	4.20105e-05	0.849715	STK38L	Intron	0.0612403
chr12	27397595	-0.135667	0.0314418	4.20612e-05	0.849731	STK38L	Intron	0.0612672
chr1	205537857	-0.135613	0.0314445	4.2392e-05	0.904588	MFSD4A	Intergenic (nearest gene 254 bp away)	0.0617019
chr4	42153729	-0.13558	0.0314462	4.2594e-05	0.871514	BEND4	Coding_region	0.0618713
chr15	44829590	-0.135579	0.0314462	4.25997e-05	0.871354	EIF3J	Coding_region	0.0618713
chr22	38240395	-0.135576	0.0314464	4.26188e-05	0.864464	ANKRD54	3_UTR	0.0618713
chr1	205537877	-0.135548	0.0314477	4.27858e-05	0.904609	MFSD4A	Intergenic (nearest gene 234 bp away)	0.0618713
chr19	11308470	-0.135546	0.0314478	4.27987e-05	0.807343	KANK2	Intergenic (nearest gene 227 bp away)	0.0618713
chr12	27397565	-0.135526	0.0314488	4.29263e-05	0.849956	STK38L	Intron	0.0618713
chr13	114000786	0.135524	0.0314489	4.29332e-05	0.130814	GRTP1	Intron	0.0618713
chr1	205537887	-0.135516	0.0314493	4.29838e-05	0.904619	MFSD4A	Intergenic (nearest gene 224 bp away)	0.0618713
chr1	205537891	-0.135503	0.0314499	4.30633e-05	0.904623	MFSD4A	Intergenic (nearest gene 220 bp away)	0.0618713
chr4	42153525	-0.135503	0.03145	4.30675e-05	0.874316	BEND4	Intron	0.0618713
chr12	27397557	-0.135483	0.031451	4.31909e-05	0.850015	STK38L	Intron	0.0618713
chr4	42153732	-0.135479	0.0314511	4.32123e-05	0.871495	BEND4	Coding_region	0.0618713
chr5	120913512	0.135474	0.0314514	4.32451e-05	0.0409586	LOC102467226	Intergenic (nearest gene 251980 bp away)	0.0618713
chr5	120913504	0.135473	0.0314515	4.32546e-05	0.0409586	LOC102467226	Intergenic (nearest gene 251972 bp away)	0.0618713
chr1	205537901	-0.135471	0.0314515	4.32624e-05	0.904633	MFSD4A	Intergenic (nearest gene 210 bp away)	0.0618713
chr5	85106244	0.13547	0.0314516	4.32676e-05	0.0685543	NBPF22P	Intergenic (nearest gene 472017 bp away)	0.0618713
chr5	120913488	0.135469	0.0314516	4.32735e-05	0.0409587	LOC102467226	Intergenic (nearest gene 251956 bp away)	0.0618713
chr5	85106260	0.135469	0.0314516	4.3276e-05	0.0685544	NBPF22P	Intergenic (nearest gene 472001 bp away)	0.0618713
chr5	85106276	0.135468	0.0314517	4.32844e-05	0.0685545	NBPF22P	Intergenic (nearest gene 471985 bp away)	0.0618713
chr5	85106300	0.135466	0.0314518	4.3297e-05	0.0685547	NBPF22P	Intergenic (nearest gene 471961 bp away)	0.0618713
chr5	85106308	0.135465	0.0314518	4.33012e-05	0.0685547	NBPF22P	Intergenic (nearest gene 471953 bp away)	0.0618713
chr1	205537903	-0.135465	0.0314518	4.33024e-05	0.904635	MFSD4A	Intergenic (nearest gene 208 bp away)	0.0618713
chr5	120913456	0.135463	0.0314519	4.33114e-05	0.0409588	LOC102467226	Intergenic (nearest gene 251924 bp away)	0.0618713
chr1	205414220	-0.135462	0.031452	4.33181e-05	0.7209	BLACAT1	Intron	0.0618713
chr5	120913448	0.135462	0.031452	4.33209e-05	0.0409588	LOC102467226	Intergenic (nearest gene 251916 bp away)	0.0618713
chr1	205414207	-0.135445	0.0314528	4.34263e-05	0.720785	BLACAT1	Intron	0.0619519
chr1	205537910	-0.135442	0.031453	4.34424e-05	0.904642	MFSD4A	Intergenic (nearest gene 201 bp away)	0.0619519
chr9	504203	-0.135432	0.0314535	4.35053e-05	0.878948	KANK1	Intron	0.061995
chr1	205414191	-0.135423	0.0314539	4.35631e-05	0.720645	BLACAT1	Intron	0.061995
chr22	40390666	-0.135422	0.031454	4.35703e-05	0.781523	FAM83F	Intergenic (nearest gene 286 bp away)	0.061995
chr4	42153735	-0.135377	0.0314562	4.38519e-05	0.871476	BEND4	Coding_region	0.0623491
chr1	205414136	-0.135343	0.0314579	4.40634e-05	0.720169	BLACAT1	Intron	0.0625834
chr1	205414134	-0.13534	0.031458	4.40824e-05	0.720152	BLACAT1	Intron	0.0625834
chr1	205414119	-0.135318	0.0314591	4.42272e-05	0.720024	BLACAT1	Intron	0.0626916
chr17	73285450	-0.135315	0.0314593	4.42451e-05	0.861734	SLC25A19	5_UTR	0.0626916
chr18	55710934	-0.135308	0.0314596	4.42859e-05	0.878501	NEDD4L	Intergenic (nearest gene 675 bp away)	0.0626916
chr4	42153737	-0.135308	0.0314596	4.42904e-05	0.871464	BEND4	Coding_region	0.0626916
chr9	504208	-0.135274	0.0314613	4.45043e-05	0.879138	KANK1	Intron	0.0629475
chr1	205537969	-0.135253	0.0314623	4.46382e-05	0.904699	MFSD4A	Intergenic (nearest gene 142 bp away)	0.0630368
chr15	44829601	-0.135245	0.0314627	4.46914e-05	0.871766	EIF3J	Coding_region	0.0630368
chr5	85108876	0.135244	0.0314628	4.46965e-05	0.068571	NBPF22P	Intergenic (nearest gene 469385 bp away)	0.0630368
chr1	205537972	-0.135243	0.0314628	4.46998e-05	0.904702	MFSD4A	Intergenic (nearest gene 139 bp away)	0.0630368
chr1	205537982	-0.135211	0.0314644	4.49055e-05	0.904711	MFSD4A	Intergenic (nearest gene 129 bp away)	0.06328
chr1	205537986	-0.135198	0.031465	4.4988e-05	0.904715	MFSD4A	Intergenic (nearest gene 125 bp away)	0.0633494
chr1	205537995	-0.13517	0.0314664	4.51742e-05	0.904723	MFSD4A	Intergenic (nearest gene 116 bp away)	0.0635645
chr1	205537997	-0.135163	0.0314668	4.52156e-05	0.904725	MFSD4A	Intergenic (nearest gene 114 bp away)	0.0635759
chr1	205538003	-0.135144	0.0314677	4.53402e-05	0.904731	MFSD4A	Intergenic (nearest gene 108 bp away)	0.0637039
chr1	205538007	-0.135131	0.0314683	4.54234e-05	0.904734	MFSD4A	Intergenic (nearest gene 104 bp away)	0.0637738
chr19	11308448	-0.13512	0.0314689	4.54982e-05	0.807802	KANK2	Intergenic (nearest gene 205 bp away)	0.0638317
chr1	205538020	-0.13509	0.0314704	4.56947e-05	0.904746	MFSD4A	Intergenic (nearest gene 91 bp away)	0.0640602
chr1	205538023	-0.13508	0.0314709	4.57575e-05	0.904749	MFSD4A	Intergenic (nearest gene 88 bp away)	0.0641011
chr18	55710945	-0.135068	0.0314714	4.58344e-05	0.878735	NEDD4L	Intergenic (nearest gene 664 bp away)	0.0641615
chr15	44829607	-0.135058	0.031472	4.59018e-05	0.871985	EIF3J	Coding_region	0.0641945
chr1	205538031	-0.135054	0.0314721	4.59254e-05	0.904756	MFSD4A	Intergenic (nearest gene 80 bp away)	0.0641945
chr9	504215	-0.135048	0.0314724	4.59677e-05	0.879406	KANK1	Intron	0.0642065
chr1	205538037	-0.135035	0.0314731	4.60516e-05	0.904761	MFSD4A	Intergenic (nearest gene 74 bp away)	0.0642765
chr1	205538040	-0.135026	0.0314736	4.61148e-05	0.904764	MFSD4A	Intergenic (nearest gene 71 bp away)	0.0643176
chr1	205538043	-0.135016	0.031474	4.61781e-05	0.904767	MFSD4A	Intergenic (nearest gene 68 bp away)	0.0643588
chr4	42153516	-0.135004	0.0314746	4.62559e-05	0.874575	BEND4	Intron	0.0643823
chr1	205538047	-0.135003	0.0314747	4.62626e-05	0.90477	MFSD4A	Intergenic (nearest gene 64 bp away)	0.0643823
chr2	38101787	-0.134982	0.0314757	4.6404e-05	0.843826	LINC00211	Intron	0.0645319
chr2	38101852	-0.134971	0.0314762	4.64729e-05	0.84415	LINC00211	Intron	0.0645549
chr1	205538059	-0.134965	0.0314765	4.65169e-05	0.904781	MFSD4A	Intergenic (nearest gene 52 bp away)	0.0645549
chr2	38101878	-0.134964	0.0314766	4.65223e-05	0.844289	LINC00211	Intron	0.0645549
chr1	205538069	-0.134933	0.0314781	4.67298e-05	0.904789	MFSD4A	Intergenic (nearest gene 42 bp away)	0.0647956
chr1	205538077	-0.134907	0.0314794	4.69007e-05	0.904796	MFSD4A	Intergenic (nearest gene 34 bp away)	0.0649852
chr1	205538088	-0.134872	0.0314811	4.71365e-05	0.904806	MFSD4A	Intergenic (nearest gene 23 bp away)	0.0652401
chr15	44829613	-0.134868	0.0314813	4.71632e-05	0.8722	EIF3J	Coding_region	0.0652401
chr4	184365300	-0.134865	0.0314815	4.71874e-05	0.860994	CDKN2AIP	Intergenic (nearest gene 443 bp away)	0.0652401
chr18	55710954	-0.134857	0.0314819	4.72402e-05	0.878921	NEDD4L	Intergenic (nearest gene 655 bp away)	0.0652657
chr1	205538102	-0.134827	0.0314833	4.7438e-05	0.904817	MFSD4A	Intergenic (nearest gene 9 bp away)	0.0654914
chr1	205538105	-0.134818	0.0314838	4.75028e-05	0.90482	MFSD4A	Intergenic (nearest gene 6 bp away)	0.0655334
chr1	205538107	-0.134811	0.0314841	4.75461e-05	0.904822	MFSD4A	Intergenic (nearest gene 4 bp away)	0.0655456
chr7	27279202	-0.134788	0.0314852	4.77027e-05	0.807764	EVX1-AS	Intergenic (nearest gene 1845 bp away)	0.0657139
chr1	205538122	-0.134764	0.0314865	4.78716e-05	0.904834	MFSD4A	5_UTR	0.0658989
chr13	114000816	0.134735	0.0314879	4.80708e-05	0.129853	GRTP1	Intron	0.0660825
chr18	55710959	-0.134734	0.0314879	4.80744e-05	0.879023	NEDD4L	Intergenic (nearest gene 650 bp away)	0.0660825
chrX	379157	0.134712	0.031489	4.82256e-05	0.130002	PPP2R3B	Intergenic (nearest gene 31467 bp away)	0.0662425
chr15	44829619	-0.134675	0.0314908	4.84773e-05	0.872411	EIF3J	Coding_region	0.0665402
chr4	42153755	-0.134644	0.0314923	4.86942e-05	0.871355	BEND4	Coding_region	0.0667898
chr19	11308423	-0.134627	0.0314932	4.88123e-05	0.808318	KANK2	Intergenic (nearest gene 180 bp away)	0.0669035
chr18	55710965	-0.134582	0.0314954	4.91249e-05	0.879143	NEDD4L	Intergenic (nearest gene 644 bp away)	0.0672835
chr19	11308417	-0.134508	0.031499	4.96491e-05	0.808441	KANK2	Intergenic (nearest gene 174 bp away)	0.0679527
chr22	40390673	-0.134414	0.0315036	5.0314e-05	0.782682	FAM83F	Intergenic (nearest gene 279 bp away)	0.0688132
chr4	42153761	-0.134408	0.0315039	5.03603e-05	0.871319	BEND4	Coding_region	0.068827
chr19	11308408	-0.134328	0.0315079	5.09359e-05	0.808625	KANK2	Intergenic (nearest gene 165 bp away)	0.0695638
chr4	42153764	-0.134287	0.0315099	5.12329e-05	0.871301	BEND4	Coding_region	0.0699192
chr17	73285444	-0.134279	0.0315103	5.12913e-05	0.860585	SLC25A19	5_UTR	0.0699489
chr19	11308405	-0.134267	0.0315108	5.13734e-05	0.808687	KANK2	Intergenic (nearest gene 162 bp away)	0.0700106
chr19	11308403	-0.134227	0.0315128	5.16674e-05	0.808727	KANK2	Intergenic (nearest gene 160 bp away)	0.070361
chr15	44829633	-0.134215	0.0315134	5.17575e-05	0.872886	EIF3J	Intron	0.0704332
chr4	42153768	-0.134123	0.0315179	5.24388e-05	0.871277	BEND4	Coding_region	0.0713095
chrX	153094164	-0.134053	0.0315213	5.29573e-05	0.796666	PDZD4	Intron	0.0719631
chr12	53784415	-0.134026	0.0315226	5.31625e-05	0.752199	SP1	Intron	0.0721904
chr12	27397379	-0.133994	0.0315242	5.34046e-05	0.851232	STK38L	Intron	0.0724675
chr4	42153500	-0.133953	0.0315262	5.37144e-05	0.875084	BEND4	Intron	0.072836
chr15	40728967	-0.133881	0.0315297	5.42586e-05	0.826961	IVD	Intergenic (nearest gene 821 bp away)	0.0734966
chr15	44829643	-0.133877	0.0315299	5.42927e-05	0.873211	EIF3J	Intron	0.0734966
chr4	42153774	-0.133871	0.0315302	5.43421e-05	0.871242	BEND4	Coding_region	0.0734966
chr13	114000846	0.133869	0.0315303	5.4356e-05	0.128889	GRTP1	Intron	0.0734966
chr15	44829646	-0.133774	0.0315349	5.50859e-05	0.873307	EIF3J	Intron	0.0744307
chr18	55710995	-0.133764	0.0315354	5.51692e-05	0.879719	NEDD4L	Intergenic (nearest gene 614 bp away)	0.0744903
chr17	73285441	-0.133751	0.031536	5.52667e-05	0.860007	SLC25A19	5_UTR	0.0745691
chr4	42153777	-0.133742	0.0315365	5.53374e-05	0.871224	BEND4	Coding_region	0.0746116
chr4	42153497	-0.133731	0.031537	5.54214e-05	0.875185	BEND4	Intron	0.0746309
chr4	184365322	-0.13373	0.0315371	5.54332e-05	0.865098	CDKN2AIP	Intergenic (nearest gene 421 bp away)	0.0746309
chr9	504253	-0.133725	0.0315373	5.54694e-05	0.880927	KANK1	Intron	0.0746309
chr18	55710998	-0.133677	0.0315396	5.58449e-05	0.879774	NEDD4L	Intergenic (nearest gene 611 bp away)	0.0750831
chr12	53784337	-0.133631	0.0315419	5.62088e-05	0.753474	SP1	Intron	0.0755191
chr12	53784335	-0.133621	0.0315424	5.62896e-05	0.753506	SP1	Intron	0.0755743
chr12	53784332	-0.133606	0.0315431	5.64111e-05	0.753555	SP1	Intron	0.0756841
chr12	53784323	-0.13356	0.0315453	5.67776e-05	0.753702	SP1	Intron	0.0761221
chr12	53789921	-0.133547	0.031546	5.68847e-05	0.656421	SP1	Intron	0.0762121
chr18	55711004	-0.133503	0.0315481	5.72344e-05	0.879883	NEDD4L	Intergenic (nearest gene 605 bp away)	0.0765828
chr4	42153494	-0.133502	0.0315482	5.72419e-05	0.875289	BEND4	Intron	0.0765828
chr22	40390680	-0.133405	0.0315529	5.80291e-05	0.78378	FAM83F	Intergenic (nearest gene 272 bp away)	0.0775815
chr4	42153785	-0.133392	0.0315535	5.81391e-05	0.871176	BEND4	Coding_region	0.077674
chr19	39365005	-0.13335	0.0315556	5.84804e-05	0.81183	RINL	Intron	0.0780751
chr4	42153492	-0.133345	0.0315558	5.85224e-05	0.87536	BEND4	Intron	0.0780766
chr19	11308359	-0.133329	0.0315566	5.86561e-05	0.809615	KANK2	Intergenic (nearest gene 116 bp away)	0.0782
chr12	53789962	-0.133292	0.0315584	5.89575e-05	0.655702	SP1	Intron	0.0785469
chr19	39365015	-0.133261	0.0315599	5.92201e-05	0.811718	RINL	Intron	0.0788219
chr4	42153788	-0.133257	0.0315601	5.92467e-05	0.871157	BEND4	Coding_region	0.0788219
chr15	40728950	-0.133223	0.0315617	5.95324e-05	0.827742	IVD	Intergenic (nearest gene 804 bp away)	0.0791466
chr12	53789981	-0.133175	0.0315641	5.99399e-05	0.655369	SP1	Intron	0.0796329
chr12	53789989	-0.133125	0.0315665	6.03577e-05	0.655228	SP1	Intron	0.0801059
chr12	89745985	-0.133122	0.0315666	6.03875e-05	0.853809	DUSP6	5_UTR	0.0801059
chr19	45251132	-0.133117	0.0315668	6.04222e-05	0.831767	BCL3	Intergenic (nearest gene 845 bp away)	0.0801059
chr12	27397300	-0.133014	0.0315719	6.13088e-05	0.85171	STK38L	Intron	0.0812074
chr12	89746014	-0.13301	0.031572	6.13383e-05	0.85284	DUSP6	5_UTR	0.0812074
chr4	184365336	-0.133001	0.0315725	6.14162e-05	0.867254	CDKN2AIP	Intergenic (nearest gene 407 bp away)	0.081254
chr18	29264774	-0.13299	0.031573	6.15092e-05	0.892714	B4GALT6	Intergenic (nearest gene 88 bp away)	0.0813204
chr15	53034991	0.132955	0.0315747	6.18133e-05	0.172973	ONECUT1	Intergenic (nearest gene 12259 bp away)	0.0816657
chr4	42153795	-0.132939	0.0315755	6.19568e-05	0.871115	BEND4	Coding_region	0.0817986
chr19	39365053	-0.13292	0.0315764	6.21212e-05	0.811295	RINL	Intron	0.0819403
chr12	89745698	-0.132916	0.0315766	6.21502e-05	0.86114	DUSP6	Coding_region	0.0819403
chr12	89745694	-0.132897	0.0315775	6.23212e-05	0.861209	DUSP6	Coding_region	0.0821089
chr1	149516212	0.132885	0.0315781	6.24259e-05	0.139305	RNVU1-19	Intergenic (nearest gene 1956 bp away)	0.0821452
chr19	39365057	-0.132884	0.0315782	6.2435e-05	0.81125	RINL	Intron	0.0821452
chr1	149516200	0.132871	0.0315788	6.25433e-05	0.139243	RNVU1-19	Intergenic (nearest gene 1944 bp away)	0.0822047
chr1	149516196	0.132867	0.031579	6.25843e-05	0.139223	RNVU1-19	Intergenic (nearest gene 1940 bp away)	0.0822047
chr15	53034930	0.132863	0.0315792	6.26152e-05	0.173241	ONECUT1	Intergenic (nearest gene 12320 bp away)	0.0822047
chr17	73285436	-0.132859	0.0315794	6.2653e-05	0.85904	SLC25A19	Exonic_Splice.5_UTR	0.0822047
chr12	27397288	-0.132848	0.0315799	6.27455e-05	0.851779	STK38L	Intron	0.0822324
chr4	42153797	-0.132846	0.03158	6.27642e-05	0.871102	BEND4	Coding_region	0.0822324
chr1	149516176	0.132842	0.0315802	6.28037e-05	0.13912	RNVU1-19	Intergenic (nearest gene 1920 bp away)	0.0822324
chr12	89745681	-0.13283	0.0315808	6.29045e-05	0.861429	DUSP6	Coding_region	0.0822738
chr19	11308335	-0.132828	0.0315808	6.29217e-05	0.810093	KANK2	Intergenic (nearest gene 92 bp away)	0.0822738
chr1	149516152	0.132808	0.0315818	6.30994e-05	0.138997	RNVU1-19	Intergenic (nearest gene 1896 bp away)	0.0824464
chr12	89745676	-0.132803	0.031582	6.31403e-05	0.861511	DUSP6	Coding_region	0.0824464
chr12	27397284	-0.132792	0.0315826	6.32397e-05	0.851802	STK38L	Intron	0.0824759
chr12	89745673	-0.132787	0.0315828	6.3285e-05	0.861559	DUSP6	Coding_region	0.0824759
chr19	11308333	-0.132786	0.0315829	6.32929e-05	0.810132	KANK2	Intergenic (nearest gene 90 bp away)	0.0824759
chr19	39365069	-0.132776	0.0315834	6.33866e-05	0.811116	RINL	Intron	0.0825415
chr15	40728938	-0.132756	0.0315843	6.35615e-05	0.828284	IVD	Intergenic (nearest gene 792 bp away)	0.0827127
chr12	89745666	-0.132748	0.0315847	6.36321e-05	0.861671	DUSP6	Coding_region	0.0827479
chr19	39365073	-0.132739	0.0315851	6.37071e-05	0.811072	RINL	Intron	0.082789
chr12	89745661	-0.132719	0.0315861	6.38882e-05	0.861749	DUSP6	Coding_region	0.0829676
chr19	11308329	-0.132702	0.0315869	6.40426e-05	0.810211	KANK2	Intergenic (nearest gene 86 bp away)	0.0831115
chr19	1523858	0.132684	0.0315878	6.41987e-05	0.882103	PLK5	Intergenic (nearest gene 214 bp away)	0.0832574
chr12	27397275	-0.132664	0.0315888	6.43805e-05	0.851853	STK38L	Intron	0.0833796
chr12	89745651	-0.13266	0.031589	6.44216e-05	0.861901	DUSP6	Coding_region	0.0833796
chr4	42153801	-0.132659	0.031589	6.44244e-05	0.871078	BEND4	Coding_region	0.0833796
chr12	27397273	-0.132635	0.0315902	6.46396e-05	0.851864	STK38L	Intron	0.0835587
chr19	1523856	0.132634	0.0315902	6.46506e-05	0.881474	PLK5	Intergenic (nearest gene 216 bp away)	0.0835587
chr12	89745640	-0.132591	0.0315923	6.50421e-05	0.862063	DUSP6	Coding_region	0.0840078
chr1	208702570	0.132543	0.0315946	6.54772e-05	0.170696	LINC01717	Intergenic (nearest gene 199462 bp away)	0.0844991
chr1	208702557	0.132539	0.0315948	6.55113e-05	0.170676	LINC01717	Intergenic (nearest gene 199475 bp away)	0.0844991
chr1	205538838	-0.132528	0.0315953	6.56187e-05	0.905243	MFSD4A	Intron	0.0845803
chr4	42153804	-0.132518	0.0315958	6.57099e-05	0.871059	BEND4	Coding_region	0.0845844
chr2	24300359	-0.132512	0.0315961	6.57598e-05	0.907825	TP53I3	3_UTR	0.0845844
chr1	205538844	-0.132509	0.0315962	6.57858e-05	0.905245	MFSD4A	Intron	0.0845844
chr1	208702444	0.132508	0.0315963	6.57995e-05	0.1705	LINC01717	Intergenic (nearest gene 199588 bp away)	0.0845844
chr4	184365346	-0.132495	0.0315969	6.59158e-05	0.868597	CDKN2AIP	Intergenic (nearest gene 397 bp away)	0.0846767
chr15	40728931	-0.132483	0.0315975	6.60334e-05	0.828597	IVD	Intergenic (nearest gene 785 bp away)	0.0847705
chr1	205538870	-0.132431	0.0316	6.65138e-05	0.905254	MFSD4A	Intron	0.0853296
chr12	27397257	-0.132401	0.0316014	6.67866e-05	0.851953	STK38L	5_UTR	0.0856219
chr7	27279217	-0.132347	0.0316041	6.72963e-05	0.808285	EVX1-AS	Intergenic (nearest gene 1830 bp away)	0.0862173
chr4	42153480	-0.132327	0.031605	6.74842e-05	0.875799	BEND4	Intron	0.0863999
chr19	1523867	0.132319	0.0316054	6.7554e-05	0.88484	PLK5	Intergenic (nearest gene 205 bp away)	0.0864312
chr13	114000894	0.132309	0.0316059	6.7647e-05	0.12734	GRTP1	Intron	0.0864921
chr12	89746141	-0.132259	0.0316083	6.81227e-05	0.848289	DUSP6	5_UTR	0.0870418
chr19	45251115	-0.132244	0.031609	6.82623e-05	0.830805	BCL3	Intergenic (nearest gene 862 bp away)	0.0871617
chr4	42153810	-0.132231	0.0316096	6.83875e-05	0.871021	BEND4	Coding_region	0.087263
chr9	504291	-0.132209	0.0316107	6.85976e-05	0.882542	KANK1	Intron	0.0874725
chr19	1523869	0.13211	0.0316155	6.95511e-05	0.885429	PLK5	Intergenic (nearest gene 203 bp away)	0.0885973
chr2	24300341	-0.132107	0.0316156	6.95728e-05	0.907737	TP53I3	3_UTR	0.0885973
chr4	42153813	-0.132086	0.0316166	6.97809e-05	0.871002	BEND4	Coding_region	0.0888029
chr1	205538993	-0.13206	0.0316179	7.00351e-05	0.905288	MFSD4A	Intron	0.0890487
chr20	37075274	-0.132056	0.031618	7.00715e-05	0.778461	SNHG11	Intergenic (nearest gene 22 bp away)	0.0890487
chr4	42153477	-0.132052	0.0316183	7.01143e-05	0.875914	BEND4	Intron	0.0890487
chr9	504296	-0.131989	0.0316212	7.07219e-05	0.882761	KANK1	Intron	0.0897605
chr20	37075277	-0.131981	0.0316216	7.08045e-05	0.778496	SNHG11	Intergenic (nearest gene 19 bp away)	0.0898054
chr12	89745554	-0.131931	0.031624	7.1298e-05	0.863099	DUSP6	Coding_region	0.0903712
chr12	89746184	-0.131904	0.0316253	7.1563e-05	0.84667	DUSP6	5_UTR	0.0905766
chr12	89745551	-0.131904	0.0316253	7.15656e-05	0.863128	DUSP6	Coding_region	0.0905766
chr9	504298	-0.1319	0.0316255	7.16028e-05	0.882849	KANK1	Intron	0.0905766
chr13	114000906	0.131883	0.0316263	7.17737e-05	0.126952	GRTP1	Intron	0.0907325
chr3	5164258	-0.131855	0.0316277	7.20509e-05	0.919586	ARL8B	Coding_region	0.0910224
chr20	37075283	-0.131829	0.0316289	7.23138e-05	0.778566	SNHG11	Intergenic (nearest gene 13 bp away)	0.091294
chr3	5164270	-0.131807	0.03163	7.25282e-05	0.919916	ARL8B	Coding_region	0.091504
chr12	89745540	-0.131803	0.0316302	7.25779e-05	0.863231	DUSP6	Coding_region	0.091506
chr3	5164272	-0.131797	0.0316305	7.2635e-05	0.91997	ARL8B	Coding_region	0.0915174
chr12	53790208	-0.131786	0.031631	7.27448e-05	0.65138	SP1	Intron	0.0915952
chr4	42153474	-0.131768	0.0316318	7.29232e-05	0.87603	BEND4	Intron	0.0917591
chr12	89746200	-0.13176	0.0316322	7.30073e-05	0.846063	DUSP6	5_UTR	0.0917879
chr3	5164279	-0.131754	0.0316325	7.30667e-05	0.920157	ARL8B	Intron	0.0917879
chr20	37075286	-0.131752	0.0316326	7.30907e-05	0.778601	SNHG11	Intergenic (nearest gene 10 bp away)	0.0917879
chr4	184365362	-0.131729	0.0316337	7.3319e-05	0.870428	CDKN2AIP	Intergenic (nearest gene 381 bp away)	0.0919952
chr3	5164283	-0.131726	0.0316339	7.33524e-05	0.920262	ARL8B	Intron	0.0919952
chr18	55711063	-0.13171	0.0316346	7.35175e-05	0.880876	NEDD4L	Intergenic (nearest gene 546 bp away)	0.0921415
chr12	53790224	-0.13169	0.0316356	7.37209e-05	0.651099	SP1	Intron	0.0922867
chr19	1523846	0.131689	0.0316356	7.37303e-05	0.878216	PLK5	Intergenic (nearest gene 226 bp away)	0.0922867
chr12	27397210	-0.13167	0.0316365	7.39218e-05	0.852205	STK38L	5_UTR	0.0924656
chr4	184365364	-0.131638	0.0316381	7.42507e-05	0.870631	CDKN2AIP	Intergenic (nearest gene 379 bp away)	0.092816
chr12	89745522	-0.131629	0.0316385	7.43459e-05	0.863385	DUSP6	Coding_region	0.0928445
chr3	5164295	-0.131626	0.0316386	7.43711e-05	0.920571	ARL8B	Intron	0.0928445
chr12	89746216	-0.131609	0.0316395	7.45474e-05	0.845455	DUSP6	5_UTR	0.0929472
chr12	27397206	-0.131605	0.0316397	7.45909e-05	0.852226	STK38L	5_UTR	0.0929472
chr15	44829706	-0.131604	0.0316397	7.45997e-05	0.874991	EIF3J	Intron	0.0929472
chr12	89745519	-0.131599	0.03164	7.46547e-05	0.863409	DUSP6	Coding_region	0.0929548
chr3	5164299	-0.131588	0.0316404	7.47619e-05	0.920671	ARL8B	Intron	0.0930274
chr4	42153472	-0.131575	0.0316411	7.49015e-05	0.876109	BEND4	Intron	0.0931403
chr19	45251102	-0.131563	0.0316417	7.50274e-05	0.830059	BCL3	Intergenic (nearest gene 875 bp away)	0.093236
chr22	40390693	-0.131542	0.0316427	7.52466e-05	0.785664	FAM83F	Intergenic (nearest gene 259 bp away)	0.0934158
chr12	27397202	-0.131539	0.0316428	7.52703e-05	0.852247	STK38L	5_UTR	0.0934158
chr12	89745507	-0.131476	0.0316458	7.59325e-05	0.863501	DUSP6	Coding_region	0.0941763
chr12	53790266	-0.131438	0.0316476	7.6328e-05	0.650359	SP1	Intron	0.0946052
chr7	27279222	-0.131408	0.031649	7.66414e-05	0.808449	EVX1-AS	Intergenic (nearest gene 1825 bp away)	0.0949268
chr3	5164187	-0.131404	0.0316492	7.66872e-05	0.917394	ARL8B	Coding_region	0.0949268
chr12	53790276	-0.131379	0.0316505	7.69584e-05	0.650183	SP1	Intron	0.0951521
chr4	42153470	-0.131378	0.0316505	7.69692e-05	0.876188	BEND4	Intron	0.0951521
chr4	184365370	-0.131371	0.0316508	7.70413e-05	0.871206	CDKN2AIP	Intergenic (nearest gene 373 bp away)	0.0951795
chr12	89746243	-0.13134	0.0316523	7.73726e-05	0.844426	DUSP6	5_UTR	0.0955009
chr12	53790283	-0.131337	0.0316525	7.74018e-05	0.65006	SP1	Intron	0.0955009
chr20	37075302	-0.131328	0.0316529	7.74994e-05	0.778785	SNHG11	5_UTR	0.0955594
chrX	153094195	-0.131297	0.0316544	7.78293e-05	0.793915	PDZD4	Intron	0.095904
chr12	53790292	-0.131283	0.031655	7.79745e-05	0.649902	SP1	Intron	0.0960208
chr20	37075304	-0.131273	0.0316555	7.80834e-05	0.778807	SNHG11	5_UTR	0.0960928
chr15	44829715	-0.131261	0.0316561	7.82186e-05	0.875207	EIF3J	Intron	0.0961841
chr22	40390695	-0.131257	0.0316563	7.82587e-05	0.785937	FAM83F	Intergenic (nearest gene 257 bp away)	0.0961841
chr18	55711078	-0.131245	0.0316568	7.83844e-05	0.881106	NEDD4L	Intergenic (nearest gene 531 bp away)	0.0962765
chr12	27397184	-0.131238	0.0316571	7.84598e-05	0.852338	STK38L	5_UTR	0.0962772
chr12	53790300	-0.131236	0.0316573	7.84861e-05	0.649761	SP1	Intron	0.0962772
chr4	184365374	-0.131198	0.0316591	7.89024e-05	0.871564	CDKN2AIP	Intergenic (nearest gene 369 bp away)	0.0967255
chr1	205539296	-0.131166	0.0316606	7.9249e-05	0.905338	MFSD4A	Intron	0.0970879
chr12	89745478	-0.131159	0.0316609	7.93222e-05	0.86369	DUSP6	Coding_region	0.097115
chr12	27397179	-0.131153	0.0316612	7.93854e-05	0.852363	STK38L	5_UTR	0.09713
chr5	85143422	0.131131	0.0316623	7.96324e-05	0.0687114	NBPF22P	Intergenic (nearest gene 434839 bp away)	0.0973599
chr5	85143447	0.131127	0.0316625	7.96756e-05	0.0687114	NBPF22P	Intergenic (nearest gene 434814 bp away)	0.0973599
chr5	85143491	0.13112	0.0316628	7.97516e-05	0.0687116	NBPF22P	Intergenic (nearest gene 434770 bp away)	0.0973903
chr12	89745471	-0.131078	0.0316648	8.02096e-05	0.863729	DUSP6	Coding_region	0.0978349
chr15	40728895	-0.131077	0.0316648	8.02185e-05	0.83016	IVD	Intergenic (nearest gene 749 bp away)	0.0978349
chr15	44829720	-0.131068	0.0316653	8.03197e-05	0.875323	EIF3J	Intron	0.0978956
chr12	27397173	-0.13105	0.0316661	8.05198e-05	0.852393	STK38L	5_UTR	0.0980767
chr3	5164169	-0.131035	0.0316668	8.06893e-05	0.91677	ARL8B	Coding_region	0.0982203
chr7	27279224	-0.131015	0.0316678	8.09103e-05	0.808514	EVX1-AS	Intergenic (nearest gene 1823 bp away)	0.0984265
chr20	37075314	-0.130996	0.0316687	8.11206e-05	0.778921	SNHG11	5_UTR	0.098567
chr5	137699396	-0.130995	0.0316687	8.11294e-05	0.540694	KDM3B	Intron	0.098567
chr18	29264771	-0.130988	0.0316691	8.12088e-05	0.892171	B4GALT6	Intergenic (nearest gene 85 bp away)	0.0986005
chr2	24300293	-0.130966	0.0316701	8.14602e-05	0.90749	FAM228B	Intron	0.09881
chr12	27397168	-0.130963	0.0316702	8.14851e-05	0.852418	STK38L	5_UTR	0.09881
chr2	24300291	-0.130916	0.0316725	8.20176e-05	0.90748	FAM228B	Intron	0.0993924
chr12	89746287	-0.130889	0.0316738	8.23267e-05	0.842746	DUSP6	5_UTR	0.0997035
chr5	137699425	-0.130871	0.0316746	8.25201e-05	0.539524	KDM3B	Intron	0.0998741
chr12	27397162	-0.130858	0.0316752	8.26681e-05	0.852447	STK38L	5_UTR	0.0999897
chr12	89746291	-0.130847	0.0316758	8.27981e-05	0.842592	DUSP6	5_UTR	0.100083
chr1	205411701	-0.130791	0.0316784	8.34308e-05	0.708707	BLACAT1	Intron	0.10078
chr1	205411696	-0.130786	0.0316786	8.34882e-05	0.708701	BLACAT1	Intron	0.10078
chr18	55711093	-0.130782	0.0316788	8.35332e-05	0.881329	NEDD4L	Intergenic (nearest gene 516 bp away)	0.10078
chr20	37075322	-0.130768	0.0316795	8.36974e-05	0.779012	SNHG11	5_UTR	0.100914
chr12	89745444	-0.130749	0.0316804	8.39136e-05	0.863854	DUSP6	Coding_region	0.101
chr3	5164158	-0.130748	0.0316804	8.39254e-05	0.916375	ARL8B	Coding_region	0.101
chr13	114000936	0.130748	0.0316805	8.3928e-05	0.125981	GRTP1	Intron	0.101
chr1	205411648	-0.130739	0.0316809	8.40271e-05	0.70865	BLACAT1	Intron	0.101056
chrX	153094201	-0.130696	0.0316829	8.45278e-05	0.793381	PDZD4	Intron	0.101594
chr19	11308236	-0.130687	0.0316834	8.46386e-05	0.812011	KANK2	5_UTR	0.101663
chr2	24300280	-0.13064	0.0316856	8.51838e-05	0.90742	FAM228B	Intron	0.102253
chr4	42153842	-0.130633	0.0316859	8.52602e-05	0.870806	BEND4	Coding_region	0.10228
chr12	89746312	-0.130623	0.0316864	8.5375e-05	0.841784	DUSP6	5_UTR	0.102328
chr12	89745434	-0.130621	0.0316865	8.54079e-05	0.86389	DUSP6	Coding_region	0.102328
chr15	44829732	-0.130601	0.0316875	8.56416e-05	0.875589	EIF3J	Intron	0.102522
chr19	11308232	-0.130597	0.0316876	8.56775e-05	0.812086	KANK2	5_UTR	0.102522
chr1	205407951	-0.130584	0.0316882	8.58346e-05	0.71849	BLACAT1	Intron	0.102646
chr1	205539501	-0.130578	0.0316885	8.59056e-05	0.905343	MFSD4A	Intron	0.102666
chr12	89745430	-0.130568	0.031689	8.60255e-05	0.863902	DUSP6	Coding_region	0.102679
chr4	184365389	-0.130564	0.0316892	8.60711e-05	0.872789	CDKN2AIP	Intergenic (nearest gene 354 bp away)	0.102679
chr2	24300277	-0.130563	0.0316892	8.60779e-05	0.907404	FAM228B	Intron	0.102679
chr17	4900630	-0.130553	0.0316897	8.62056e-05	0.842484	INCA1	Intron	0.102749
chr17	4900635	-0.130548	0.03169	8.62653e-05	0.844138	INCA1	Intron	0.102749
chr12	53790418	-0.130545	0.0316901	8.62984e-05	0.647681	SP1	Intron	0.102749
chr1	205407828	-0.130532	0.0316907	8.64477e-05	0.719143	BLACAT1	Intron	0.102827
chr1	205539518	-0.13053	0.0316908	8.64725e-05	0.905343	MFSD4A	Intron	0.102827
chr15	44829734	-0.130522	0.0316912	8.65686e-05	0.875632	EIF3J	Intron	0.102877
chr2	24300275	-0.130512	0.0316916	8.66814e-05	0.907393	FAM228B	Intron	0.102891
chr9	504327	-0.130512	0.0316917	8.6688e-05	0.884145	KANK1	Intron	0.102891
chr5	137699514	-0.13049	0.0316927	8.69523e-05	0.535933	KDM3B	Intron	0.10314
chr12	89746328	-0.130447	0.0316947	8.74554e-05	0.841166	DUSP6	5_UTR	0.103672
chr5	137699526	-0.130438	0.0316952	8.75693e-05	0.535449	KDM3B	Intron	0.103683
chr2	24300272	-0.130435	0.0316953	8.75982e-05	0.907377	FAM228B	Intron	0.103683
chr19	1523879	0.130429	0.0316956	8.76768e-05	0.888273	PLK5	Intergenic (nearest gene 193 bp away)	0.103683
chr4	42153846	-0.130427	0.0316957	8.7699e-05	0.870778	BEND4	Coding_region	0.103683
chr16	302305	0.130424	0.0316958	8.77366e-05	0.0425985	FAM234A	Intron	0.103683
chr12	27397137	-0.13041	0.0316965	8.78988e-05	0.852567	STK38L	5_UTR	0.10381
chr6	169016220	0.130392	0.0316973	8.81218e-05	0.134788	SMOC2	Intron	0.104009
chr18	55711106	-0.130384	0.0316977	8.82151e-05	0.881516	NEDD4L	Intergenic (nearest gene 503 bp away)	0.104055
chr12	89746335	-0.130369	0.0316984	8.8398e-05	0.840895	DUSP6	5_UTR	0.104206
chr9	504330	-0.130358	0.0316989	8.85313e-05	0.884281	KANK1	Intron	0.104298
chr19	11308221	-0.130351	0.0316992	8.86081e-05	0.812294	KANK2	5_UTR	0.104324
chr17	4900672	-0.130324	0.0317005	8.8937e-05	0.855298	INCA1	Intron	0.104608
chr12	89745412	-0.130323	0.0317006	8.89587e-05	0.863948	DUSP6	Intron	0.104608
chr3	5164144	-0.130314	0.031701	8.90649e-05	0.915857	ARL8B	5_UTR	0.104668
chr12	89745410	-0.130294	0.0317019	8.93009e-05	0.863952	DUSP6	Intron	0.104881
chr19	11308218	-0.130284	0.0317024	8.94264e-05	0.812351	KANK2	5_UTR	0.104963
chr9	504332	-0.130254	0.0317038	8.97939e-05	0.884372	KANK1	Intron	0.10533
chr19	11308216	-0.130239	0.0317045	8.99767e-05	0.812388	KANK2	5_UTR	0.105479
chr19	11308214	-0.130194	0.0317067	9.05306e-05	0.812426	KANK2	5_UTR	0.106022
chr13	113997677	0.130192	0.0317067	9.05512e-05	0.16648	GRTP1	Intron	0.106022
chr12	89746351	-0.130186	0.031707	9.06279e-05	0.840276	DUSP6	5_UTR	0.106047
chr3	5164140	-0.130175	0.0317076	9.07681e-05	0.915706	ARL8B	5_UTR	0.106143
chr12	27397124	-0.130171	0.0317078	9.08218e-05	0.852627	STK38L	5_UTR	0.106143
chr19	11308212	-0.130149	0.0317088	9.10884e-05	0.812463	KANK2	5_UTR	0.106389
chr18	55711115	-0.13011	0.0317106	9.15718e-05	0.881642	NEDD4L	Intergenic (nearest gene 494 bp away)	0.106888
chr9	504335	-0.130097	0.0317113	9.17399e-05	0.884509	KANK1	Intron	0.106935
chr12	89746359	-0.130093	0.0317114	9.17826e-05	0.839966	DUSP6	5_UTR	0.106935
chr12	89745396	-0.130093	0.0317115	9.17932e-05	0.863973	DUSP6	Intron	0.106935
chr1	205416880	-0.130089	0.0317116	9.18361e-05	0.745682	BLACAT1	Intron	0.106935
chr14	75643894	-0.130074	0.0317123	9.20276e-05	0.849545	TMED10	Intergenic (nearest gene 545 bp away)	0.107092
chr12	89745394	-0.130063	0.0317129	9.21636e-05	0.863975	DUSP6	Intron	0.107185
chr1	205416888	-0.13005	0.0317135	9.23238e-05	0.745758	BLACAT1	Intron	0.107305
chr1	84326755	-0.130042	0.0317139	9.24298e-05	0.858632	LINC01725	Intergenic (nearest gene 76 bp away)	0.107357
chr12	89746364	-0.130035	0.0317142	9.25179e-05	0.839773	DUSP6	5_UTR	0.107357
chr12	89745392	-0.130033	0.0317143	9.25377e-05	0.863977	DUSP6	Intron	0.107357
chr19	11308206	-0.130014	0.0317152	9.27845e-05	0.812576	KANK2	5_UTR	0.107578
chr12	89745390	-0.130003	0.0317157	9.29155e-05	0.863978	DUSP6	Intron	0.107665
chr1	84326742	-0.129971	0.0317172	9.33249e-05	0.858567	LINC01725	Intergenic (nearest gene 63 bp away)	0.108071
chr17	4900702	-0.129967	0.0317174	9.33794e-05	0.863107	INCA1	Intron	0.108071
chr4	42153855	-0.129959	0.0317177	9.34729e-05	0.870711	BEND4	Coding_region	0.108113
chr3	5164134	-0.129954	0.031718	9.35374e-05	0.915477	ARL8B	5_UTR	0.108122
chr2	24300253	-0.129938	0.0317187	9.37408e-05	0.907271	FAM228B	Intron	0.108291
chr17	4900705	-0.129925	0.0317194	9.39158e-05	0.863835	INCA1	Intron	0.108384
chr19	11308202	-0.129923	0.0317194	9.39345e-05	0.812651	KANK2	5_UTR	0.108384
chr1	84326731	-0.12991	0.03172	9.40977e-05	0.858511	LINC01725	Intergenic (nearest gene 52 bp away)	0.108506
chr17	4900573	-0.129897	0.0317207	9.42629e-05	0.820769	INCA1	Intron	0.108631
chr3	126201796	0.129889	0.031721	9.43671e-05	0.107602	UROC1	Intron	0.108685
chr15	44829750	-0.129885	0.0317213	9.44248e-05	0.875956	EIF3J	Intron	0.108686
chr1	84326721	-0.129855	0.0317227	9.48129e-05	0.858459	LINC01725	Intergenic (nearest gene 42 bp away)	0.109065
chr12	27397107	-0.12985	0.0317229	9.48689e-05	0.852704	STK38L	5_UTR	0.109065
chr1	205416932	-0.129833	0.0317237	9.50899e-05	0.746178	BLACAT1	Intron	0.109147
chr19	11308198	-0.129832	0.0317237	9.51003e-05	0.812725	KANK2	5_UTR	0.109147
chr2	24300249	-0.129831	0.0317238	9.51123e-05	0.907249	FAM228B	Intron	0.109147
chr1	84326714	-0.129815	0.0317245	9.53208e-05	0.858423	LINC01725	Intergenic (nearest gene 35 bp away)	0.109249
chr12	27397105	-0.129812	0.0317247	9.53624e-05	0.852713	STK38L	5_UTR	0.109249
chr1	84326712	-0.129804	0.0317251	9.54671e-05	0.858413	LINC01725	Intergenic (nearest gene 33 bp away)	0.109249
chr1	205416938	-0.129803	0.0317251	9.54784e-05	0.746235	BLACAT1	Intron	0.109249
chr4	42153858	-0.129802	0.0317251	9.54875e-05	0.870689	BEND4	Coding_region	0.109249
chr17	4900714	-0.129793	0.0317256	9.56138e-05	0.865962	INCA1	Intron	0.109327
chr13	113997626	0.129771	0.0317266	9.58912e-05	0.166056	GRTP1	Intron	0.109554
chr13	114000960	0.129765	0.0317269	9.59774e-05	0.125203	GRTP1	Intron	0.109554
chr19	11308195	-0.129764	0.0317269	9.59851e-05	0.812781	KANK2	5_UTR	0.109554
chr1	84326704	-0.129759	0.0317272	9.60572e-05	0.858371	LINC01725	Intergenic (nearest gene 25 bp away)	0.109571
chr17	4900718	-0.129732	0.0317285	9.64114e-05	0.866883	INCA1	Intron	0.109901
chr2	24300245	-0.129724	0.0317288	9.65128e-05	0.907226	FAM228B	Intron	0.109901
chr9	504342	-0.129722	0.0317289	9.65365e-05	0.884829	KANK1	Intron	0.109901
chr3	5164128	-0.129719	0.0317291	9.65809e-05	0.915244	ARL8B	5_UTR	0.109901
chr13	113997619	0.129714	0.0317293	9.66349e-05	0.165996	GRTP1	Intron	0.109901
chr1	84326695	-0.129707	0.0317296	9.6731e-05	0.858324	LINC01725	Intergenic (nearest gene 16 bp away)	0.109944
chr14	75643759	-0.129675	0.0317311	9.71513e-05	0.851478	TMED10	Intergenic (nearest gene 410 bp away)	0.110356
chr1	84326686	-0.129655	0.031732	9.74155e-05	0.858277	LINC01725	Intergenic (nearest gene 7 bp away)	0.11059
chr4	42153861	-0.129645	0.0317325	9.75479e-05	0.870666	BEND4	Coding_region	0.11063
chr2	24300242	-0.129643	0.0317326	9.75825e-05	0.907209	FAM228B	Intron	0.11063
chr18	29264769	-0.129639	0.0317328	9.76248e-05	0.8918	B4GALT6	Intergenic (nearest gene 83 bp away)	0.11063
chr18	55711131	-0.129629	0.0317333	9.7763e-05	0.881859	NEDD4L	Intergenic (nearest gene 478 bp away)	0.110721
chr13	113997607	0.129617	0.0317338	9.79152e-05	0.165893	GRTP1	Intron	0.110827
chr9	504344	-0.129613	0.031734	9.79761e-05	0.884921	KANK1	Intron	0.11083
chr14	75643738	-0.1296	0.0317347	9.81512e-05	0.851775	TMED10	Intergenic (nearest gene 389 bp away)	0.110962
chr6	38607073	-0.129573	0.0317359	9.85124e-05	0.841652	BTBD9	Intron	0.111038
chr6	38607059	-0.12957	0.0317361	9.85508e-05	0.841562	BTBD9	Intron	0.111038
chr6	38607040	-0.129565	0.0317363	9.86196e-05	0.841431	BTBD9	Intron	0.111038
chr14	75643727	-0.129559	0.0317366	9.86983e-05	0.851931	TMED10	Intergenic (nearest gene 378 bp away)	0.111038
chr6	38607206	-0.129559	0.0317366	9.86998e-05	0.84223	BTBD9	Intron	0.111038
chr1	84326669	-0.129556	0.0317367	9.87388e-05	0.858186	LINC01725	3_UTR	0.111038
chr6	38607214	-0.129555	0.0317367	9.87453e-05	0.842248	BTBD9	Intron	0.111038
chr3	5164124	-0.129553	0.0317368	9.87719e-05	0.915087	ARL8B	5_UTR	0.111038
chr6	38607221	-0.129552	0.0317369	9.87885e-05	0.842262	BTBD9	Intron	0.111038
chr4	42153453	-0.129548	0.0317371	9.88385e-05	0.876891	BEND4	Intron	0.111038
chr6	38607242	-0.129541	0.0317374	9.89377e-05	0.842297	BTBD9	Intron	0.111038
chr6	38607245	-0.129539	0.0317375	9.89615e-05	0.842301	BTBD9	Intron	0.111038
chr1	84326666	-0.129538	0.0317376	9.89765e-05	0.85817	LINC01725	3_UTR	0.111038
chr19	47534881	0.129531	0.0317379	9.9066e-05	0.165947	NPAS1	Intron	0.111044
chr6	38607261	-0.129529	0.031738	9.90987e-05	0.842318	BTBD9	Intron	0.111044
chr12	27397090	-0.129522	0.0317383	9.91859e-05	0.852779	STK38L	5_UTR	0.111077
chr2	24300237	-0.129506	0.031739	9.94035e-05	0.90718	FAM228B	Intron	0.111255
chr19	1523883	0.12949	0.0317398	9.96136e-05	0.889365	PLK5	Intergenic (nearest gene 189 bp away)	0.111405
chr4	42153864	-0.129487	0.0317399	9.96546e-05	0.870643	BEND4	Coding_region	0.111405
chr17	4900735	-0.129454	0.0317415	0.00010011	0.870627	INCA1	Intron	0.111849
chr6	38607366	-0.129427	0.0317428	0.000100473	0.842274	BTBD9	Intron	0.112189
chr6	38607375	-0.129415	0.0317433	0.000100633	0.84226	BTBD9	Intron	0.112301
chr6	38607379	-0.12941	0.0317436	0.000100706	0.842253	BTBD9	Intron	0.112317
chr6	38607384	-0.129403	0.0317439	0.0001008	0.842244	BTBD9	Intron	0.112355
chr6	38607391	-0.129393	0.0317443	0.000100934	0.842232	BTBD9	Intron	0.112439
chr12	89746418	-0.129379	0.031745	0.000101134	0.837694	DUSP6	5_UTR	0.112596
chr6	38607408	-0.129368	0.0317455	0.00010128	0.842198	BTBD9	Intron	0.112667
chr12	27397082	-0.129365	0.0317456	0.000101316	0.852814	STK38L	5_UTR	0.112667
chr19	47534891	0.12935	0.0317464	0.00010153	0.166323	NPAS1	Intron	0.112839
chr6	38607428	-0.129336	0.031747	0.000101721	0.842152	BTBD9	Intron	0.11295
chr19	11308176	-0.12933	0.0317473	0.000101803	0.813134	KANK2	5_UTR	0.11295
chr4	42153867	-0.129329	0.0317473	0.000101808	0.870619	BEND4	Coding_region	0.11295
chr6	38607438	-0.129319	0.0317478	0.000101956	0.842128	BTBD9	Intron	0.113043
chr4	42153451	-0.129315	0.031748	0.000102011	0.876977	BEND4	Intron	0.113043
chr6	38607455	-0.129288	0.0317493	0.00010238	0.842083	BTBD9	Intron	0.113386
chr6	38607461	-0.129277	0.0317498	0.000102536	0.842067	BTBD9	Intron	0.113493
chr3	126201855	0.129266	0.0317503	0.000102678	0.106977	UROC1	Intron	0.113577
chr6	38607470	-0.129259	0.0317506	0.000102778	0.842041	BTBD9	Intron	0.113577
chr17	4900746	-0.129258	0.0317507	0.000102791	0.872914	INCA1	Intron	0.113577
chr6	38607473	-0.129253	0.0317509	0.000102861	0.842033	BTBD9	Intron	0.113589
chr19	11308172	-0.129238	0.0317516	0.000103077	0.813207	KANK2	5_UTR	0.113705
chr6	38607481	-0.129237	0.0317516	0.000103086	0.842009	BTBD9	Intron	0.113705
chr6	38607488	-0.129223	0.0317523	0.000103289	0.841988	BTBD9	Intron	0.113742
chr6	38607493	-0.129212	0.0317528	0.000103437	0.841972	BTBD9	Intron	0.113742
chr6	38607495	-0.129208	0.031753	0.000103497	0.841966	BTBD9	Intron	0.113742
chr6	38607497	-0.129203	0.0317532	0.000103558	0.84196	BTBD9	Intron	0.113742
chr12	89746432	-0.129203	0.0317533	0.000103569	0.837161	DUSP6	5_UTR	0.113742
chr3	5164116	-0.129202	0.0317533	0.000103571	0.91477	ARL8B	5_UTR	0.113742
chr17	4900553	-0.1292	0.0317534	0.000103601	0.811736	INCA1	Intron	0.113742
chr1	84326610	-0.129196	0.0317536	0.000103664	0.857863	LINC01725	3_UTR	0.113742
chr6	38607503	-0.12919	0.0317538	0.000103742	0.841941	BTBD9	Intron	0.113742
chr18	55711146	-0.129185	0.0317541	0.000103815	0.882056	NEDD4L	Intergenic (nearest gene 463 bp away)	0.113742
chr17	4900750	-0.129184	0.0317541	0.000103827	0.87372	INCA1	Intron	0.113742
chr6	38607506	-0.129183	0.0317542	0.000103836	0.841931	BTBD9	Intron	0.113742
chr19	7989705	-0.129153	0.0317556	0.000104262	0.695038	CTXN1	3_UTR	0.11403
chr22	40390710	-0.129152	0.0317556	0.00010428	0.787838	FAM83F	Intergenic (nearest gene 242 bp away)	0.11403
chr15	44829768	-0.129152	0.0317556	0.000104282	0.876284	EIF3J	Intron	0.11403
chr6	38607522	-0.129147	0.0317559	0.000104354	0.841877	BTBD9	Intron	0.11403
chr6	38607524	-0.129142	0.0317561	0.000104421	0.841871	BTBD9	Intron	0.11403
chr12	89746437	-0.129139	0.0317562	0.000104458	0.836971	DUSP6	5_UTR	0.11403
chr6	38607527	-0.129135	0.0317564	0.000104522	0.84186	BTBD9	Intron	0.114034
chr12	27397070	-0.129127	0.0317568	0.000104635	0.852865	STK38L	Intergenic (nearest gene 7 bp away)	0.114092
chr6	38607535	-0.129115	0.0317573	0.000104798	0.841832	BTBD9	Intron	0.114204
chr4	42153872	-0.129065	0.0317597	0.000105502	0.870579	BEND4	Coding_region	0.114905
chr6	38607565	-0.129037	0.031761	0.000105905	0.841723	BTBD9	Intron	0.115187
chr3	126201876	0.129035	0.0317611	0.000105931	0.106893	UROC1	Intron	0.115187
chr2	24300220	-0.129033	0.0317612	0.000105971	0.907081	FAM228B	Intron	0.115187
chr17	4900758	-0.12903	0.0317613	0.000106003	0.875293	INCA1	Intron	0.115187
chr12	27397065	-0.129026	0.0317615	0.000106063	0.852886	STK38L	Intergenic (nearest gene 12 bp away)	0.115187
chr3	5164112	-0.129017	0.0317619	0.000106193	0.914609	ARL8B	5_UTR	0.115205
chr1	84326582	-0.129016	0.031762	0.000106201	0.857705	LINC01725	3_UTR	0.115205
chr6	38607581	-0.128992	0.0317631	0.000106545	0.841661	BTBD9	5_UTR	0.115475
chr17	4900760	-0.128991	0.0317632	0.00010657	0.875678	INCA1	Intron	0.115475
chr12	89745328	-0.128977	0.0317638	0.000106764	0.863905	DUSP6	Intron	0.115619
chr19	47534913	0.12895	0.031765	0.000107154	0.167168	NPAS1	Intron	0.115975
chr17	73285415	-0.128941	0.0317655	0.000107292	0.854917	SLC25A19	Intron	0.116058
chr12	27397060	-0.128925	0.0317662	0.000107519	0.852907	STK38L	Intergenic (nearest gene 17 bp away)	0.116231
chr6	38607605	-0.128921	0.0317664	0.000107574	0.841564	BTBD9	5_UTR	0.116231
chr4	42153875	-0.128907	0.0317671	0.000107782	0.870555	BEND4	Coding_region	0.11639
chr18	55711156	-0.128893	0.0317677	0.000107976	0.882184	NEDD4L	Intergenic (nearest gene 453 bp away)	0.116428
chr1	84326563	-0.128892	0.0317678	0.000108003	0.857597	LINC01725	3_UTR	0.116428
chr17	4900765	-0.12889	0.0317679	0.000108029	0.876627	INCA1	Intron	0.116428
chr20	37075382	-0.128887	0.031768	0.000108062	0.779675	SNHG11	5_UTR	0.116428
chr21	34914849	-0.128868	0.0317689	0.000108346	0.812691	GART	Intron	0.116668
chr15	44829775	-0.128862	0.0317692	0.000108437	0.876401	EIF3J	Intron	0.1167
chr21	34914809	-0.128851	0.0317697	0.000108596	0.814237	GART	Intron	0.116805
chr3	5164108	-0.128825	0.0317709	0.000108972	0.914446	ARL8B	5_UTR	0.1171
chr17	4900545	-0.128824	0.0317709	0.000108993	0.807892	INCA1	Intron	0.1171
chr20	37075384	-0.12882	0.0317711	0.000109055	0.779697	SNHG11	5_UTR	0.117101
chr17	4900769	-0.128807	0.0317717	0.000109241	0.877373	INCA1	Intron	0.117234
chr19	7989697	-0.128776	0.0317732	0.000109696	0.691331	CTXN1	3_UTR	0.117656
chr13	51763097	-0.128768	0.0317735	0.000109815	0.889477	C13orf42	Intergenic (nearest gene 16573 bp away)	0.117682
chr6	38607652	-0.128766	0.0317736	0.000109843	0.841363	BTBD9	5_UTR	0.117682
chr12	27397052	-0.128762	0.0317738	0.000109906	0.852939	STK38L	Intergenic (nearest gene 25 bp away)	0.117682
chr21	34914778	-0.128751	0.0317743	0.00011006	0.815362	GART	Intron	0.117702
chr20	37075386	-0.128751	0.0317743	0.000110062	0.779718	SNHG11	5_UTR	0.117702
chr4	42153878	-0.128748	0.0317745	0.000110109	0.87053	BEND4	Coding_region	0.117702
chr11	45683032	-0.128726	0.0317755	0.000110437	0.525317	CHST1	Intron	0.117859
chr6	38607664	-0.128723	0.0317756	0.000110481	0.841309	BTBD9	5_UTR	0.117859
chr17	4900773	-0.128722	0.0317757	0.000110494	0.878106	INCA1	Intron	0.117859
chr2	24300209	-0.128718	0.0317759	0.000110555	0.907016	FAM228B	Intron	0.117859
chr13	51763047	-0.128717	0.0317759	0.000110566	0.889321	C13orf42	Intergenic (nearest gene 16523 bp away)	0.117859
chr6	38607670	-0.128701	0.0317767	0.00011081	0.841281	BTBD9	5_UTR	0.118053
chr12	89745312	-0.128679	0.0317777	0.00011113	0.863846	DUSP6	Intron	0.118202
chr6	38607676	-0.128678	0.0317777	0.000111145	0.841254	BTBD9	5_UTR	0.118202
chr3	5164105	-0.128677	0.0317778	0.000111164	0.914324	ARL8B	5_UTR	0.118202
chr1	84326531	-0.128675	0.0317779	0.000111199	0.85741	LINC01725	3_UTR	0.118202
chr6	38607679	-0.128667	0.0317782	0.000111314	0.84124	BTBD9	5_UTR	0.118259
chr21	34914906	-0.128656	0.0317788	0.000111476	0.810296	GART	5_UTR	0.118365
chr6	38607685	-0.128644	0.0317793	0.000111659	0.841212	BTBD9	5_UTR	0.118493
chr18	55711165	-0.128634	0.0317798	0.000111803	0.882297	NEDD4L	Intergenic (nearest gene 444 bp away)	0.118547
chr6	38607688	-0.128632	0.0317799	0.000111834	0.841198	BTBD9	5_UTR	0.118547
chr6	38607691	-0.128621	0.0317804	0.00011201	0.841184	BTBD9	5_UTR	0.118649
chr12	27397045	-0.128618	0.0317805	0.000112055	0.852968	STK38L	Intergenic (nearest gene 32 bp away)	0.118649
chr17	4900541	-0.128612	0.0317808	0.000112142	0.805917	INCA1	Intron	0.118675
chr1	84326521	-0.128605	0.0317811	0.000112241	0.857351	LINC01725	3_UTR	0.118714
chr6	38607696	-0.128601	0.0317813	0.000112308	0.84116	BTBD9	5_UTR	0.118719
chr4	42153881	-0.128589	0.0317819	0.000112485	0.870505	BEND4	Coding_region	0.118739
chr21	34914748	-0.128588	0.0317819	0.000112507	0.816395	GART	Intron	0.118739
chr19	47534933	0.128587	0.031782	0.000112515	0.167955	NPAS1	Intron	0.118739
chr1	84326517	-0.128577	0.0317824	0.000112664	0.857327	LINC01725	3_UTR	0.118831
chr6	38607705	-0.128564	0.031783	0.000112857	0.841117	BTBD9	5_UTR	0.118914
chr12	89745306	-0.128564	0.031783	0.000112868	0.86382	DUSP6	Intron	0.118914
chr6	38607708	-0.128552	0.0317836	0.000113043	0.841102	BTBD9	5_UTR	0.118959
chr6	38607710	-0.128544	0.031784	0.000113168	0.841092	BTBD9	5_UTR	0.118959
chr21	34914741	-0.12854	0.0317841	0.000113225	0.816628	GART	Intron	0.118959
chr11	45683008	-0.128538	0.0317842	0.000113255	0.523765	CHST1	Intron	0.118959
chr6	38607712	-0.128536	0.0317844	0.000113295	0.841083	BTBD9	5_UTR	0.118959
chr13	114000988	0.128526	0.0317848	0.000113435	0.124295	GRTP1	Intron	0.118959
chr3	5164102	-0.128525	0.0317848	0.000113452	0.9142	ARL8B	5_UTR	0.118959
chr12	89745304	-0.128525	0.0317849	0.000113459	0.863811	DUSP6	Intron	0.118959
chr19	7989692	-0.128524	0.0317849	0.000113473	0.688998	CTXN1	3_UTR	0.118959
chr6	38607716	-0.128519	0.0317851	0.000113549	0.841063	BTBD9	5_UTR	0.118974
chr21	34914928	-0.128494	0.0317863	0.000113935	0.809307	GART	5_UTR	0.119312
chr6	38607724	-0.128485	0.0317867	0.000114068	0.841023	BTBD9	5_UTR	0.119386
chr21	34914730	-0.128459	0.0317879	0.000114465	0.816988	GART	Intron	0.119736
chr6	38607731	-0.128455	0.0317881	0.000114532	0.840989	BTBD9	5_UTR	0.11974
chr21	34914728	-0.128443	0.0317886	0.000114706	0.817053	GART	Intron	0.119743
chr6	38607734	-0.128441	0.0317887	0.000114735	0.840974	BTBD9	5_UTR	0.119743
chr15	85291369	-0.128439	0.0317889	0.000114774	0.914955	ZNF592	Intergenic (nearest gene 448 bp away)	0.119743
chr19	1523832	0.128438	0.0317889	0.000114787	0.873311	PLK5	Intergenic (nearest gene 240 bp away)	0.119743
chr1	84326495	-0.12842	0.0317897	0.000115056	0.857195	LINC01725	Intron	0.119959
chr6	38607740	-0.128415	0.03179	0.000115145	0.840943	BTBD9	5_UTR	0.119985
chr6	38607742	-0.128406	0.0317904	0.000115283	0.840933	BTBD9	5_UTR	0.120064
chr12	27397034	-0.128388	0.0317912	0.00011555	0.853011	STK38L	Intergenic (nearest gene 43 bp away)	0.12012
chr12	89745297	-0.128386	0.0317913	0.000115583	0.863777	DUSP6	Intron	0.12012
chr3	126201927	0.128385	0.0317914	0.000115605	0.107215	UROC1	Intron	0.12012
chr8	95960821	-0.128383	0.0317914	0.000115629	0.919533	NDUFAF6	Intron	0.12012
chr8	95960814	-0.128382	0.0317915	0.000115652	0.919705	NDUFAF6	Intron	0.12012
chr8	95960832	-0.128375	0.0317918	0.000115762	0.919256	NDUFAF6	Intron	0.120168
chr3	5164099	-0.12837	0.0317921	0.00011584	0.914076	ARL8B	5_UTR	0.120183
chr8	95960841	-0.128358	0.0317926	0.000116021	0.919023	NDUFAF6	Intron	0.120289
chr1	84326486	-0.128355	0.0317927	0.000116068	0.857141	LINC01725	Intron	0.120289
chr8	95960847	-0.128342	0.0317933	0.000116268	0.918865	NDUFAF6	Intron	0.120375
chr6	38607756	-0.128342	0.0317934	0.000116278	0.840861	BTBD9	5_UTR	0.120375
chr21	34914945	-0.128335	0.0317937	0.000116383	0.808518	GART	5_UTR	0.120395
chr6	38607758	-0.128332	0.0317938	0.000116423	0.840851	BTBD9	5_UTR	0.120395
chr4	42153886	-0.128324	0.0317942	0.000116553	0.870462	BEND4	Coding_region	0.120464
chr8	95960854	-0.128319	0.0317944	0.000116631	0.918677	NDUFAF6	Intron	0.120479
chr19	7989688	-0.128315	0.0317946	0.0001167	0.687124	CTXN1	3_UTR	0.120485
chr3	126201932	0.128309	0.0317949	0.00011679	0.107289	UROC1	Intron	0.120512
chr6	38607764	-0.128304	0.0317951	0.000116866	0.84082	BTBD9	5_UTR	0.120525
chr19	47534949	0.128296	0.0317955	0.000116984	0.168599	NPAS1	Intron	0.120582
chr8	95960865	-0.128272	0.0317966	0.000117365	0.918375	NDUFAF6	Intron	0.120909
chr8	95960868	-0.128257	0.0317973	0.0001176	0.918292	NDUFAF6	Intron	0.121082
chr21	34914706	-0.128253	0.0317975	0.00011766	0.81775	GART	Intron	0.121082
chr6	38607778	-0.128236	0.0317983	0.00011793	0.840746	BTBD9	5_UTR	0.121295
chr6	38607782	-0.128216	0.0317992	0.000118243	0.840725	BTBD9	5_UTR	0.121551
chr3	5164096	-0.128211	0.0317994	0.000118329	0.913951	ARL8B	5_UTR	0.121567
chr21	34914700	-0.128196	0.0318001	0.000118565	0.817936	GART	Intron	0.121567
chr20	37075402	-0.128192	0.0318003	0.000118627	0.77989	SNHG11	5_UTR	0.121567
chr22	40390717	-0.12819	0.0318004	0.000118655	0.788643	FAM83F	Intergenic (nearest gene 235 bp away)	0.121567
chr7	27279237	-0.128189	0.0318005	0.00011868	0.808916	EVX1-AS	Intergenic (nearest gene 1810 bp away)	0.121567
chr11	70963590	0.128188	0.0318005	0.000118691	0.894147	SHANK2	Intergenic (nearest gene 27748 bp away)	0.121567
chr6	38607788	-0.128186	0.0318006	0.00011872	0.840693	BTBD9	5_UTR	0.121567
chr18	55711181	-0.128182	0.0318008	0.000118789	0.882491	NEDD4L	Intergenic (nearest gene 428 bp away)	0.121567
chr1	84326462	-0.128177	0.031801	0.000118863	0.856994	LINC01725	Intron	0.121567
chr8	144681271	-0.128171	0.0318013	0.000118958	0.78905	TIGD5	Coding_region	0.121567
chr21	34914960	-0.12817	0.0318013	0.00011898	0.807803	GART	5_UTR	0.121567
chr21	34914697	-0.128166	0.0318015	0.000119034	0.818028	GART	Intron	0.121567
chr12	89745286	-0.128163	0.0318016	0.00011909	0.863716	DUSP6	Intron	0.121567
chr11	70963593	0.128152	0.0318021	0.000119261	0.894054	SHANK2	Intergenic (nearest gene 27751 bp away)	0.121677
chr11	70963576	0.128146	0.0318024	0.00011936	0.894556	SHANK2	Intergenic (nearest gene 27734 bp away)	0.121713
chr1	84326457	-0.128139	0.0318027	0.000119465	0.856963	LINC01725	Intron	0.121754
chr6	38607802	-0.128114	0.0318039	0.000119867	0.840617	BTBD9	5_UTR	0.121943
chr6	20783321	0.128108	0.0318042	0.000119971	0.103638	CDKAL1	Intron	0.121943
chr6	20783309	0.128107	0.0318042	0.000119981	0.103642	CDKAL1	Intron	0.121943
chr6	20783285	0.128106	0.0318043	0.000120001	0.103651	CDKAL1	Intron	0.121943
chr6	20783253	0.128104	0.0318044	0.000120028	0.103663	CDKAL1	Intron	0.121943
chr11	70963596	0.128099	0.0318046	0.000120105	0.89396	SHANK2	Intergenic (nearest gene 27754 bp away)	0.121943
chr6	38607805	-0.128099	0.0318046	0.000120119	0.840601	BTBD9	5_UTR	0.121943
chr11	70963573	0.128096	0.0318048	0.000120162	0.894639	SHANK2	Intergenic (nearest gene 27731 bp away)	0.121943
chr20	37075405	-0.128085	0.0318053	0.00012034	0.779922	SNHG11	5_UTR	0.122058
chr11	70963598	0.128055	0.0318067	0.000120825	0.893897	SHANK2	Intergenic (nearest gene 27756 bp away)	0.122485
chr7	100271626	-0.128042	0.0318072	0.00012103	0.890924	GNB2	Intron	0.122546
chr6	20781065	0.128029	0.0318079	0.000121247	0.104291	CDKAL1	Intron	0.122546
chr6	20781053	0.128028	0.0318079	0.000121251	0.104293	CDKAL1	Intron	0.122546
chr6	20781049	0.128028	0.0318079	0.000121253	0.104294	CDKAL1	Intron	0.122546
chr6	20781003	0.128027	0.0318079	0.000121269	0.104304	CDKAL1	Intron	0.122546
chr6	20780997	0.128027	0.0318079	0.000121271	0.104305	CDKAL1	Intron	0.122546
chr17	4900803	-0.128018	0.0318084	0.000121419	0.883243	INCA1	5_UTR	0.12263
chr21	34914973	-0.128007	0.0318089	0.000121592	0.807169	GART	5_UTR	0.122676
chr17	4900531	-0.128007	0.0318089	0.000121593	0.800827	INCA1	Intron	0.122676
chr6	38607824	-0.127996	0.0318094	0.000121773	0.840495	BTBD9	5_UTR	0.122745
chr8	144681264	-0.127995	0.0318094	0.00012179	0.791649	TIGD5	Coding_region	0.122745
chr17	4900805	-0.127966	0.0318107	0.000122257	0.883563	INCA1	5_UTR	0.12315
chr8	95960910	-0.127952	0.0318114	0.000122487	0.917055	NDUFAF6	Intron	0.123316
chr6	38607840	-0.127906	0.0318135	0.000123243	0.840405	BTBD9	5_UTR	0.124012
chr6	38607842	-0.127895	0.0318141	0.000123431	0.840394	BTBD9	5_UTR	0.124136
chr17	4900808	-0.127888	0.0318144	0.000123544	0.884039	INCA1	5_UTR	0.124183
chr18	55711192	-0.127877	0.0318149	0.000123718	0.882621	NEDD4L	Intergenic (nearest gene 417 bp away)	0.124293
chr21	34914984	-0.127855	0.0318159	0.000124085	0.806622	GART	5_UTR	0.124554
chr8	95960920	-0.127854	0.031816	0.000124109	0.916743	NDUFAF6	Intron	0.124554
chr1	84326418	-0.127836	0.0318167	0.000124393	0.85672	LINC01725	Intron	0.12466
chr8	95960922	-0.127833	0.0318169	0.000124455	0.91668	NDUFAF6	Intron	0.12466
chr4	42153439	-0.127832	0.0318169	0.000124464	0.877505	BEND4	Intron	0.12466
chr20	37075412	-0.127831	0.031817	0.000124476	0.779996	SNHG11	5_UTR	0.12466
chr11	70963563	0.127804	0.0318182	0.000124924	0.894903	SHANK2	Intergenic (nearest gene 27721 bp away)	0.125043
chr4	42153896	-0.127794	0.0318187	0.000125094	0.870373	BEND4	Coding_region	0.125147
chr21	34914662	-0.12778	0.0318194	0.000125336	0.819066	GART	Intron	0.125321
chr8	144681257	-0.127776	0.0318195	0.0001254	0.794209	TIGD5	Coding_region	0.125321
chr8	95960931	-0.127733	0.0318215	0.000126111	0.916391	NDUFAF6	Intron	0.125965
chr11	70963561	0.127724	0.0318219	0.000126267	0.894953	SHANK2	Intergenic (nearest gene 27719 bp away)	0.126056
chr8	95960934	-0.127699	0.0318231	0.000126697	0.916294	NDUFAF6	Intron	0.126419
chr8	95960937	-0.127663	0.0318248	0.000127302	0.916196	NDUFAF6	Intron	0.126956
chr21	34914652	-0.127655	0.0318251	0.000127428	0.819351	GART	Intron	0.127008
chr1	84326395	-0.12765	0.0318253	0.000127513	0.856573	LINC01725	Intron	0.127008
chr22	40390721	-0.127648	0.0318255	0.000127555	0.78908	FAM83F	Intergenic (nearest gene 231 bp away)	0.127008
chr21	34914998	-0.127641	0.0318258	0.000127667	0.805913	GART	5_UTR	0.127053
chr3	5164085	-0.127598	0.0318277	0.000128396	0.913486	ARL8B	5_UTR	0.127655
chr18	29264766	-0.127598	0.0318278	0.000128406	0.891233	B4GALT6	Intergenic (nearest gene 80 bp away)	0.127655
chr11	70963558	0.12759	0.0318281	0.000128532	0.895028	SHANK2	Intergenic (nearest gene 27716 bp away)	0.127714
chr8	95960944	-0.127576	0.0318288	0.000128785	0.915965	NDUFAF6	Intron	0.127898
chr4	42153437	-0.127571	0.031829	0.000128858	0.877595	BEND4	Intron	0.127904
chr1	84326384	-0.127559	0.0318295	0.000129066	0.856502	LINC01725	Intron	0.128044
chr19	1523890	0.127541	0.0318304	0.000129382	0.891216	PLK5	Intergenic (nearest gene 182 bp away)	0.128291
chr20	37075420	-0.127537	0.0318306	0.000129454	0.78008	SNHG11	5_UTR	0.128295
chr17	4900822	-0.127502	0.0318322	0.000130055	0.886186	INCA1	5_UTR	0.128824
chr8	95960952	-0.12747	0.0318336	0.000130605	0.915697	NDUFAF6	Intron	0.129263
chr7	27279240	-0.127468	0.0318337	0.000130635	0.809004	EVX1-AS	Intergenic (nearest gene 1807 bp away)	0.129263
chr6	38607911	-0.127464	0.0318339	0.000130712	0.839986	BTBD9	5_UTR	0.129273
chr11	70963555	0.127441	0.031835	0.000131102	0.895101	SHANK2	Intergenic (nearest gene 27713 bp away)	0.129524
chr1	84326370	-0.127441	0.031835	0.000131102	0.856412	LINC01725	Intron	0.129524
chr5	85163629	0.127421	0.0318359	0.000131452	0.0687988	NBPF22P	Intergenic (nearest gene 414632 bp away)	0.129712
chr17	4900825	-0.127415	0.0318362	0.000131568	0.88663	INCA1	5_UTR	0.129712
chr5	85163681	0.12741	0.0318364	0.000131642	0.0687991	NBPF22P	Intergenic (nearest gene 414580 bp away)	0.129712
chr5	85163685	0.12741	0.0318364	0.000131657	0.0687991	NBPF22P	Intergenic (nearest gene 414576 bp away)	0.129712
chr5	85163693	0.127408	0.0318365	0.000131686	0.0687992	NBPF22P	Intergenic (nearest gene 414568 bp away)	0.129712
chr5	85163697	0.127407	0.0318365	0.000131701	0.0687992	NBPF22P	Intergenic (nearest gene 414564 bp away)	0.129712
chr3	5164081	-0.127365	0.0318385	0.000132446	0.913315	ARL8B	5_UTR	0.130378
chr20	37075425	-0.12735	0.0318392	0.000132708	0.780132	SNHG11	5_UTR	0.130539
chr12	48487576	-0.127347	0.0318393	0.000132747	0.659013	SENP1	Intron	0.130539
chr14	75643324	-0.12734	0.0318396	0.000132882	0.857477	TMED10	5_UTR	0.130605
chr14	75643321	-0.127318	0.0318406	0.000133268	0.857517	TMED10	5_UTR	0.130916
chr14	75643319	-0.127303	0.0318413	0.000133526	0.857544	TMED10	5_UTR	0.131103
chr19	4575539	-0.127286	0.0318421	0.000133839	0.661412	SEMA6B	Intergenic (nearest gene 15768 bp away)	0.131342
chr17	4900830	-0.127266	0.031843	0.00013419	0.887358	INCA1	5_UTR	0.131618
chr11	70963551	0.127219	0.0318452	0.000135017	0.895196	SHANK2	Intergenic (nearest gene 27709 bp away)	0.132359
chr7	100271646	-0.127216	0.0318453	0.000135084	0.890823	GNB2	Intron	0.132359
chr14	75643306	-0.127207	0.0318457	0.000135235	0.857717	TMED10	5_UTR	0.132438
chr2	225293227	-0.127189	0.0318466	0.000135562	0.875481	FAM124B	Intergenic (nearest gene 26516 bp away)	0.132691
chr19	39365667	-0.127176	0.0318472	0.0001358	0.804429	RINL	Intron	0.132791
chr4	42153434	-0.127173	0.0318473	0.000135852	0.877731	BEND4	Intron	0.132791
chr19	4575511	-0.127172	0.0318474	0.000135874	0.660744	SEMA6B	Intergenic (nearest gene 15740 bp away)	0.132791
chr14	75643296	-0.127132	0.0318492	0.000136581	0.857851	TMED10	5_UTR	0.133414
chr1	1474670	-0.127103	0.0318505	0.000137119	0.809903	TMEM240	Intron	0.133871
chr2	225293223	-0.127069	0.0318521	0.000137726	0.875469	FAM124B	Intergenic (nearest gene 26512 bp away)	0.134394
chr7	100271650	-0.127045	0.0318531	0.00013816	0.890802	GNB2	Intron	0.134749
chr19	45251020	-0.12699	0.0318557	0.000139171	0.825128	BCL3	Intergenic (nearest gene 957 bp away)	0.135665
chr1	1474631	-0.126982	0.0318561	0.000139323	0.801552	TMEM240	Intron	0.135744
chr12	89747670	-0.1269	0.0318598	0.000140839	0.827796	DUSP6	Intergenic (nearest gene 1034 bp away)	0.137151
chr12	89747661	-0.126892	0.0318602	0.00014098	0.827579	DUSP6	Intergenic (nearest gene 1025 bp away)	0.137164
chr19	7989663	-0.126892	0.0318602	0.000140996	0.675267	CTXN1	3_UTR	0.137164
chr3	5164073	-0.126879	0.0318608	0.000141223	0.912968	ARL8B	5_UTR	0.137314
chr12	89747647	-0.126874	0.031861	0.000141322	0.827246	DUSP6	Intergenic (nearest gene 1011 bp away)	0.13734
chr12	89747728	-0.126863	0.0318615	0.000141537	0.829257	DUSP6	Intergenic (nearest gene 1092 bp away)	0.137479
chr12	89747628	-0.126838	0.0318626	0.000141998	0.826807	DUSP6	Intergenic (nearest gene 992 bp away)	0.1378
chr12	89747739	-0.126837	0.0318627	0.000142012	0.829544	DUSP6	Intergenic (nearest gene 1103 bp away)	0.1378
chr2	225293215	-0.126829	0.0318631	0.000142167	0.875443	FAM124B	Intergenic (nearest gene 26504 bp away)	0.137867
chr4	184365487	-0.126826	0.0318632	0.000142226	0.877559	CDKN2AIP	Intergenic (nearest gene 256 bp away)	0.137867
chr12	89747617	-0.126812	0.0318638	0.000142486	0.826559	DUSP6	Intergenic (nearest gene 981 bp away)	0.137921
chr12	89747748	-0.126812	0.0318638	0.000142489	0.829782	DUSP6	Intergenic (nearest gene 1112 bp away)	0.137921
chr14	75643254	-0.126808	0.031864	0.000142559	0.858409	TMED10	Coding_region	0.137921
chr12	89747751	-0.126802	0.0318643	0.000142665	0.829861	DUSP6	Intergenic (nearest gene 1115 bp away)	0.137921
chr12	89747753	-0.126796	0.0318646	0.000142786	0.829914	DUSP6	Intergenic (nearest gene 1117 bp away)	0.137921
chr4	42153915	-0.126795	0.0318646	0.000142802	0.870191	BEND4	Coding_region	0.137921
chr17	4900845	-0.126791	0.0318648	0.000142889	0.889457	INCA1	5_UTR	0.137921
chr1	84326297	-0.126788	0.0318649	0.00014293	0.855928	LINC01725	Intron	0.137921
chr9	4654698	-0.126785	0.0318651	0.000143002	0.659573	SPATA6L	Intron	0.137921
chr12	89747758	-0.126779	0.0318653	0.000143106	0.830048	DUSP6	Intergenic (nearest gene 1122 bp away)	0.137921
chr13	114001024	0.126778	0.0318654	0.000143118	0.123127	GRTP1	Intron	0.137921
chr1	84326295	-0.12677	0.0318658	0.000143285	0.855914	LINC01725	Intron	0.137921
chr14	75643249	-0.126768	0.0318658	0.000143306	0.858476	TMED10	Coding_region	0.137921
chr12	89747762	-0.126765	0.031866	0.000143378	0.830154	DUSP6	Intergenic (nearest gene 1126 bp away)	0.137921
chr9	4654689	-0.126762	0.0318661	0.000143436	0.659257	SPATA6L	Intron	0.137921
chr15	44829009	-0.126761	0.0318662	0.000143441	0.834156	EIF3J-AS1	3_UTR	0.137921
chr4	184365490	-0.126722	0.031868	0.000144187	0.877633	CDKN2AIP	Intergenic (nearest gene 253 bp away)	0.138569
chr12	89747774	-0.126717	0.0318682	0.000144282	0.830476	DUSP6	Intergenic (nearest gene 1138 bp away)	0.13859
chr11	70963543	0.126699	0.031869	0.000144615	0.895378	SHANK2	Intergenic (nearest gene 27701 bp away)	0.138801
chr1	84326287	-0.126694	0.0318693	0.000144726	0.85586	LINC01725	Intron	0.138801
chr12	89747577	-0.126691	0.0318694	0.000144769	0.8257	DUSP6	Intergenic (nearest gene 941 bp away)	0.138801
chr17	4900848	-0.12669	0.0318694	0.000144794	0.889861	INCA1	5_UTR	0.138801
chr14	75643238	-0.12668	0.0318699	0.000144979	0.858621	TMED10	Coding_region	0.138909
chr12	89747566	-0.126652	0.0318711	0.000145517	0.825477	DUSP6	Intergenic (nearest gene 930 bp away)	0.139354
chr14	75643232	-0.126632	0.0318721	0.000145908	0.858701	TMED10	Coding_region	0.139647
chr3	5164069	-0.126629	0.0318722	0.00014597	0.912793	ARL8B	5_UTR	0.139647
chr1	84326279	-0.126617	0.0318728	0.000146197	0.855806	LINC01725	Intron	0.139761
chr12	89747556	-0.126615	0.0318728	0.000146236	0.825278	DUSP6	Intergenic (nearest gene 920 bp away)	0.139761
chr12	89747550	-0.126592	0.0318739	0.000146683	0.825161	DUSP6	Intergenic (nearest gene 914 bp away)	0.140118
chr1	84326276	-0.126588	0.0318741	0.000146757	0.855785	LINC01725	Intron	0.140119
chr12	89747541	-0.126556	0.0318755	0.000147374	0.824989	DUSP6	Intergenic (nearest gene 905 bp away)	0.140595
chr11	70963541	0.126554	0.0318756	0.000147403	0.895422	SHANK2	Intergenic (nearest gene 27699 bp away)	0.140595
chr12	89747538	-0.126544	0.0318761	0.00014761	0.824932	DUSP6	Intergenic (nearest gene 902 bp away)	0.140669
chr19	4575411	-0.126543	0.0318761	0.000147629	0.65859	SEMA6B	Intergenic (nearest gene 15640 bp away)	0.140669
chr12	89747536	-0.126536	0.0318765	0.000147768	0.824895	DUSP6	Intergenic (nearest gene 900 bp away)	0.140731
[truncated: 65,715 more rows]
