# Supplementary material for: Duration of contact sports play associated with aberrant DNA methylation in human frontal cortex
Source: Research Square preprint supplement (doi:10.21203/rs.3.rs-7861173/v2), 2026-01-07
Supplement: Supplementary file 2 [file d2ff6fa80719a3ff7ea852ec.xlsx]

## Sheet: Sheet1
Chr	Pos	Closest_Gene	Beta	SE	P	Average_methylation	FDR
chr18	29265538	B4GALT6	-0.0201487	0.00617344	0.00222153	0.978534	0.866398
chr18	29265519	B4GALT6	-0.0180162	0.00552382	0.00223535	0.979343	0.435893
chr18	29265540	B4GALT6	-0.0204102	0.00626181	0.0022484	0.978431	0.292292
chr18	29265517	B4GALT6	-0.0178246	0.00547281	0.00226433	0.979413	0.220772
chr18	29265544	B4GALT6	-0.020957	0.00645173	0.00231967	0.978216	0.180934
chr18	29265547	B4GALT6	-0.0213889	0.00660624	0.00238921	0.978044	0.155299
chr18	29265552	B4GALT6	-0.0221523	0.00688826	0.00253801	0.977737	0.141403
chr18	29265491	B4GALT6	-0.0157754	0.00503052	0.00316482	0.980116	0.154285
chr18	29265487	B4GALT6	-0.0155208	0.00499138	0.00340209	0.980195	0.147424
chr18	29265485	B4GALT6	-0.0153985	0.00497405	0.00353217	0.980233	0.137755
chr18	29265476	B4GALT6	-0.014886	0.00491247	0.00421891	0.980381	0.149579
chr18	29265595	B4GALT6	-0.0313236	0.0108644	0.00624386	0.973687	0.202925
chr18	29265456	B4GALT6	-0.0139322	0.00485017	0.00642095	0.980621	0.192629
chr18	29265449	B4GALT6	-0.0136469	0.00484588	0.00743901	0.98068	0.20723
chr18	29265604	B4GALT6	-0.0338505	0.0120874	0.00774871	0.972403	0.201467
chr18	29265446	B4GALT6	-0.0135311	0.00484609	0.00791723	0.980703	0.192982
chr18	29265606	B4GALT6	-0.0344342	0.0123763	0.00812267	0.972091	0.186344
chr18	29265441	B4GALT6	-0.013346	0.00484875	0.00877114	0.980736	0.190041
chr18	29265438	B4GALT6	-0.0132393	0.00485157	0.00931785	0.980754	0.191261
chr18	29265613	B4GALT6	-0.0365244	0.0134308	0.00954485	0.970914	0.186125
chr18	29265615	B4GALT6	-0.0371317	0.0137431	0.00998315	0.970553	0.185401
chr18	29265431	B4GALT6	-0.0130022	0.00486113	0.0106941	0.980791	0.189577
chr18	29265424	B4GALT6	-0.0127798	0.00487403	0.0122117	0.98082	0.207069
chr18	29265420	B4GALT6	-0.0126587	0.00488253	0.0131411	0.980834	0.213544
chr18	29265416	B4GALT6	-0.0125415	0.00489167	0.0141145	0.980846	0.220186
chr18	29265414	B4GALT6	-0.0124844	0.00489643	0.0146173	0.980852	0.219259
chr18	29265635	B4GALT6	-0.0432029	0.0170292	0.0150818	0.966228	0.217848
chr18	29265412	B4GALT6	-0.0124281	0.0049013	0.0151305	0.980857	0.210746
chr18	29265637	B4GALT6	-0.0437885	0.017364	0.0156549	0.965717	0.210532
chr18	29265407	B4GALT6	-0.0122913	0.00491383	0.0164577	0.980868	0.21395
chr18	29265405	B4GALT6	-0.012238	0.00491895	0.0170055	0.980872	0.21394
chr18	29265642	B4GALT6	-0.0452179	0.0181966	0.017129	0.964368	0.208759
chr18	29265394	B4GALT6	-0.0119585	0.00494749	0.0201791	0.98089	0.23848
chr18	29265389	B4GALT6	-0.011838	0.00496043	0.0217085	0.980895	0.249009
chr18	29265383	B4GALT6	-0.0116983	0.00497567	0.0236061	0.980901	0.26304
chr18	29265380	B4GALT6	-0.0116305	0.0049831	0.0245776	0.980904	0.266258
chr18	29265363	B4GALT6	-0.011262	0.0050218	0.0303898	0.980919	0.320325
chr18	29265361	B4GALT6	-0.0112185	0.00502577	0.0311263	0.980921	0.319454
chr18	29265352	B4GALT6	-0.0110201	0.00504184	0.0346012	0.980933	0.346012
chr18	29265342	B4GALT6	-0.0107942	0.00505588	0.0387875	0.980952	0.378178
chr18	29265338	B4GALT6	-0.0107021	0.0050603	0.0405611	0.980961	0.385825
chr18	29265318	B4GALT6	-0.0102292	0.00507135	0.0502705	0.981019	0.466798
chr18	29265316	B4GALT6	-0.0101809	0.00507141	0.0513173	0.981026	0.465436
chr18	29265310	B4GALT6	-0.0100352	0.00507041	0.0545395	0.981049	0.483419
chr18	29265307	B4GALT6	-0.00996186	0.00506925	0.0561963	0.981061	0.487035
chr18	29265304	B4GALT6	-0.00988823	0.00506765	0.0578834	0.981074	0.490751
chr18	29265300	B4GALT6	-0.00978963	0.00506482	0.0601797	0.981092	0.499363
chr18	29265285	B4GALT6	-0.00941615	0.00504722	0.0692621	0.981171	0.562754
chr10	1103251	WDR37	-0.0380127	0.0205363	0.071382	0.982543	0.568143
chr10	1103256	WDR37	-0.0376227	0.0203806	0.0721196	0.982197	0.562533
chr10	1103234	WDR37	-0.0388488	0.0212872	0.0752954	0.983604	0.575789
chr10	1103219	WDR37	-0.0389388	0.0221787	0.0866111	0.984406	0.649583
chr10	1103214	WDR37	-0.0388329	0.022511	0.0920469	0.984648	0.677326
chr18	29265198	B4GALT6	-0.00722334	0.00475298	0.136249	0.981965	0.984022
chr18	29265196	B4GALT6	-0.00717405	0.00474327	0.138085	0.98199	0.979148
chr18	29265194	B4GALT6	-0.00712487	0.00473347	0.139935	0.982015	0.974549
chr18	29265191	B4GALT6	-0.00705132	0.00471862	0.142738	0.982054	0.976629
chr18	29265182	B4GALT6	-0.00683238	0.00467313	0.151349	0.982173	1.01769
chr18	29265176	B4GALT6	-0.00668796	0.00464215	0.157263	0.982255	1.03953
chr18	29265168	B4GALT6	-0.00649751	0.00460027	0.165373	0.982369	1.07492
chr18	29265149	B4GALT6	-0.0060562	0.0044997	0.185726	0.982654	1.18743
chr7	99156387	ZNF655	-0.00294119	0.00218583	0.185837	0.983929	1.16897
chr7	99156364	ZNF655	-0.00313419	0.00233798	0.187447	0.984489	1.16038
chr7	99156362	ZNF655	-0.00314219	0.00235256	0.189032	0.984533	1.15192
chr18	29265146	B4GALT6	-0.00598808	0.00448386	0.189088	0.982701	1.13453
chr7	99156358	ZNF655	-0.00315429	0.00238234	0.192827	0.984618	1.13943
chr18	29265142	B4GALT6	-0.00589798	0.00446282	0.193635	0.982765	1.12713
chr7	99156397	ZNF655	-0.00280267	0.00212961	0.19547	0.983659	1.12108
chr7	99156409	ZNF655	-0.00260703	0.00207162	0.21535	0.983326	1.21719
chr7	99156337	ZNF655	-0.00314626	0.00255188	0.224628	0.985016	1.2515
chr18	29265115	B4GALT6	-0.0053134	0.00432609	0.226367	0.983214	1.24343
chr18	29265110	B4GALT6	-0.00521008	0.0043023	0.232831	0.983301	1.26117
chr18	29265107	B4GALT6	-0.00514888	0.00428833	0.23677	0.983353	1.26493
chr7	99156420	ZNF655	-0.00241533	0.0020287	0.240667	0.983021	1.26838
chr11	91960218	FAT3	-0.01388	0.0120453	0.255867	0.979779	1.33051
chr11	91960201	FAT3	-0.0135466	0.0117578	0.255937	0.980401	1.31336
chr11	91960248	FAT3	-0.0142855	0.0124464	0.257719	0.978491	1.30533
chr11	91960251	FAT3	-0.014314	0.0124788	0.258006	0.978347	1.29003
chr11	91960177	FAT3	-0.0129509	0.0112908	0.258017	0.981158	1.27375
chr11	91960253	FAT3	-0.0143318	0.0124997	0.258205	0.978251	1.25875
chr7	99156427	ZNF655	-0.00229429	0.00200683	0.25957	0.982832	1.24978
chr18	29265084	B4GALT6	-0.00470089	0.00419034	0.268458	0.983767	1.27681
chr18	29265082	B4GALT6	-0.0046638	0.00418269	0.271333	0.983803	1.27494
chr18	29265079	B4GALT6	-0.00460876	0.0041715	0.275679	0.983859	1.27994
chr18	29265075	B4GALT6	-0.00453649	0.00415714	0.281534	0.983933	1.29174
chr18	29265073	B4GALT6	-0.00450084	0.00415021	0.284486	0.98397	1.29011
chr18	29265068	B4GALT6	-0.00441315	0.00413361	0.291935	0.984063	1.30868
chr7	99156438	ZNF655	-0.00211381	0.00198106	0.292211	0.982548	1.29503
chr18	29265065	B4GALT6	-0.00436154	0.00412417	0.296449	0.98412	1.29905
chr7	99156443	ZNF655	-0.00203743	0.00197269	0.307743	0.982426	1.33355
chr18	29265055	B4GALT6	-0.00419509	0.00409562	0.311705	0.984308	1.33588
chr11	91959615	FAT3	0.00643463	0.00630477	0.31343	0.983188	1.32867
chr18	29265053	B4GALT6	-0.00416286	0.00409047	0.31479	0.984346	1.32009
chr11	91959628	FAT3	0.00618251	0.00632998	0.334444	0.983216	1.38759
chr18	29265040	B4GALT6	-0.00396222	0.00406165	0.335024	0.984594	1.37536
chr18	29265035	B4GALT6	-0.00388927	0.00405278	0.342855	0.98469	1.39285
chr7	99156286	ZNF655	-0.00292248	0.00305723	0.344713	0.985734	1.38596
chr11	91959199	FAT3	0.00579819	0.00612028	0.349	0.983642	1.38888
chr7	99156283	ZNF655	-0.00291041	0.0030913	0.35197	0.985769	1.38655
chr18	29265026	B4GALT6	-0.00376406	0.00403997	0.356943	0.984862	1.39208
chr11	91959642	FAT3	0.00589394	0.00635415	0.359058	0.983251	1.38646
chr18	29265022	B4GALT6	-0.003711	0.00403559	0.363177	0.984939	1.38862
chr11	91959181	FAT3	0.0054365	0.00613699	0.380861	0.983666	1.44209
chr18	29265010	B4GALT6	-0.00356164	0.00402729	0.38165	0.985169	1.43119
chr11	91959655	FAT3	0.00561069	0.00637334	0.383808	0.983285	1.42557
chr7	99156268	ZNF655	-0.00285961	0.00326927	0.386836	0.985936	1.42326
chr7	99156469	ZNF655	-0.00170296	0.00195808	0.389523	0.981871	1.41976
chr18	29265004	B4GALT6	-0.00349265	0.00402585	0.390688	0.985283	1.41082
chr11	91959175	FAT3	0.00531352	0.00614269	0.392064	0.983673	1.4028
chr18	29264994	B4GALT6	-0.00338637	0.00402742	0.405321	0.985473	1.43705
chr18	29264992	B4GALT6	-0.00336645	0.00402832	0.40817	0.985511	1.43411
chr11	91959164	FAT3	0.00508546	0.00615359	0.413348	0.983686	1.43934
chr18	29264984	B4GALT6	-0.00329136	0.00403382	0.41925	0.985662	1.44697
chr18	29264982	B4GALT6	-0.00327386	0.00403566	0.421917	0.9857	1.4434
chr18	29264980	B4GALT6	-0.00325692	0.00403769	0.424535	0.985737	1.43973
chr18	29264975	B4GALT6	-0.00321707	0.00404354	0.430843	0.98583	1.44852
chr7	99156246	ZNF655	-0.00281845	0.00355357	0.432266	0.98616	1.44089
chr18	29264973	B4GALT6	-0.00320213	0.00404618	0.433268	0.985867	1.43199
chr17	30846190	MYO1D	-0.00850994	0.0107926	0.43494	0.97598	1.42544
chr18	29264971	B4GALT6	-0.00318779	0.00404901	0.435634	0.985904	1.41581
chr7	99156485	ZNF655	-0.001541	0.00196712	0.437905	0.981597	1.41143
chr11	91959681	FAT3	0.00500267	0.00640161	0.439015	0.98336	1.40341
chr11	91959149	FAT3	0.00477004	0.00616988	0.443887	0.9837	1.40745
chr18	29264962	B4GALT6	-0.00313054	0.00406381	0.445511	0.986069	1.4012
chr7	99156488	ZNF655	-0.00151339	0.00196984	0.446725	0.981551	1.39378
chr18	29264956	B4GALT6	-0.00309915	0.00407552	0.451348	0.986178	1.39703
chr7	99156492	ZNF655	-0.00147769	0.00197387	0.458355	0.981493	1.40755
chr7	99156227	ZNF655	-0.00281672	0.00382116	0.465236	0.986332	1.41752
chr17	30846204	MYO1D	-0.00798037	0.0108343	0.465569	0.97592	1.40753
chr17	30846653	MYO1D	0.0124421	0.0174245	0.479238	0.962408	1.43771
chr17	30846210	MYO1D	-0.00775138	0.0108582	0.479349	0.975886	1.42707
chr11	91959700	FAT3	0.00452567	0.00641366	0.484408	0.983419	1.43121
chr17	30846645	MYO1D	0.0120272	0.0172796	0.490333	0.962853	1.43782
chr17	30846643	MYO1D	0.0119236	0.0172433	0.493152	0.962963	1.43529
chr11	91959125	FAT3	0.0042581	0.006201	0.496151	0.983717	1.43332
chr17	30846639	MYO1D	0.0117165	0.0171704	0.498844	0.963181	1.43051
chr11	91959123	FAT3	0.00421517	0.00620394	0.500681	0.983719	1.42529
chr17	30846627	MYO1D	0.0110965	0.016951	0.516366	0.963822	1.4593
chr3	44349642	CAMK2B	0.015759	0.0246895	0.526836	0.598758	1.47817
chr19	35263649	ZNF599	0.0158163	0.0250551	0.531373	0.820669	1.48025
chr19	35263656	ZNF599	0.0157536	0.0250609	0.533088	0.82106	1.4745
chr19	35263659	ZNF599	0.0157275	0.0250633	0.533802	0.821219	1.46608
chr19	35263669	ZNF599	0.0156438	0.0250711	0.536099	0.821717	1.46209
chr19	35263683	ZNF599	0.0155338	0.0250812	0.53912	0.822336	1.46012
chr19	35263687	ZNF599	0.0155037	0.025084	0.539946	0.822498	1.45227
chr19	35263695	ZNF599	0.0154453	0.0250894	0.541552	0.822802	1.44661
chr19	35263701	ZNF599	0.0154029	0.0250932	0.54272	0.823016	1.43987
chr19	35263703	ZNF599	0.015389	0.0250945	0.543102	0.823084	1.43115
chr19	35263705	ZNF599	0.0153753	0.0250957	0.543481	0.823151	1.42254
chr19	35263712	ZNF599	0.015328	0.0250999	0.544784	0.823374	1.41644
chr11	91958193	FAT3	-0.00303897	0.0049842	0.545412	0.988019	1.40868
chr17	30846608	MYO1D	0.0101192	0.016601	0.545522	0.964795	1.39969
chr11	91958191	FAT3	-0.0030364	0.0049831	0.545661	0.988024	1.3909
chr11	91958205	FAT3	-0.00304653	0.00500305	0.545928	0.987978	1.38254
chr11	91959724	FAT3	0.00388712	0.00641957	0.548177	0.983497	1.37928
chr19	35263732	ZNF599	0.0151998	0.0251112	0.548317	0.82393	1.37079
chr11	91958181	FAT3	-0.00301761	0.0049863	0.548394	0.988048	1.36225
chr19	35263735	ZNF599	0.0151813	0.0251128	0.548825	0.824004	1.3547
chr19	35263738	ZNF599	0.0151631	0.0251144	0.549328	0.824075	1.34741
chr19	35263741	ZNF599	0.0151451	0.0251159	0.549825	0.824143	1.3402
chr17	30846239	MYO1D	-0.00662899	0.0110204	0.550805	0.975654	1.33425
chr7	99156144	ZNF655	-0.0031321	0.00521245	0.551222	0.986774	1.32701
chr11	91958174	FAT3	-0.00299839	0.00499712	0.551793	0.988059	1.32024
chr11	91958170	FAT3	-0.00298508	0.00500644	0.554287	0.988063	1.31812
chr19	35263770	ZNF599	0.0149799	0.0251299	0.554386	0.824687	1.31037
chr17	30846602	MYO1D	0.00981185	0.01649	0.555101	0.965093	1.30415
chr19	35263779	ZNF599	0.0149317	0.0251339	0.555718	0.824813	1.29778
chr19	35263782	ZNF599	0.0149159	0.0251351	0.556154	0.824851	1.29107
chr19	35263791	ZNF599	0.0148694	0.0251389	0.557439	0.824951	1.2864
chr11	91958165	FAT3	-0.00296602	0.00502127	0.55797	0.988067	1.28005
chr17	30846242	MYO1D	-0.00651147	0.0110413	0.558602	0.975624	1.27401
chr11	91958162	FAT3	-0.00295326	0.00503185	0.56048	0.988068	1.27086
chr7	99156126	ZNF655	-0.00325924	0.00555941	0.560916	0.986784	1.26449
chr7	99156124	ZNF655	-0.0032745	0.00559892	0.561857	0.986782	1.25934
chr7	99156122	ZNF655	-0.00328998	0.00563863	0.562773	0.986781	1.25418
chr11	91958159	FAT3	-0.00293949	0.00504369	0.563216	0.988068	1.24804
chr17	30846596	MYO1D	0.00950524	0.0163788	0.564864	0.965386	1.24462
chr11	91958156	FAT3	-0.00292469	0.00505676	0.566177	0.988068	1.2405
chr7	99156111	ZNF655	-0.00337891	0.00586043	0.567387	0.986763	1.23621
chr11	91958153	FAT3	-0.00290884	0.00507107	0.569362	0.988066	1.23362
chr7	99156103	ZNF655	-0.00344748	0.00602527	0.570331	0.98674	1.22889
chr17	30846592	MYO1D	0.00930125	0.0163047	0.571476	0.965579	1.22459
chr7	99156097	ZNF655	-0.00350094	0.0061508	0.572336	0.986718	1.21973
chr11	91958150	FAT3	-0.00289194	0.00508661	0.572769	0.988064	1.21402
chr7	99156084	ZNF655	-0.00362235	0.00642808	0.57615	0.986654	1.21459
chr11	91958147	FAT3	-0.00287396	0.00510336	0.576399	0.98806	1.20858
chr7	99156074	ZNF655	-0.00372041	0.00664598	0.578663	0.986589	1.20684
chr17	30846586	MYO1D	0.00899591	0.0161934	0.581551	0.965864	1.20641
chr7	99156539	ZNF655	-0.00112903	0.00204087	0.583126	0.980998	1.20327
chr17	30846252	MYO1D	-0.00611786	0.0111161	0.58506	0.975517	1.20091
chr11	91958139	FAT3	-0.00282062	0.00515394	0.587157	0.988047	1.19891
chr10	1102503	IDI1	0.0108976	0.0199659	0.588155	0.990681	1.19469
chr11	91959086	FAT3	0.00342075	0.00626965	0.588295	0.983731	1.18878
chr17	30846579	MYO1D	0.00864072	0.0160635	0.593547	0.966191	1.19321
chr11	91958133	FAT3	-0.00277529	0.00519743	0.596243	0.988032	1.19249
chr7	99156545	ZNF655	-0.00109181	0.00205106	0.597382	0.980956	1.18867
chr11	91959082	FAT3	0.00333549	0.00627816	0.598088	0.983731	1.18403
chr17	30846258	MYO1D	-0.0058803	0.0111647	0.601249	0.975446	1.18428
chr17	30846573	MYO1D	0.00833719	0.0159521	0.604039	0.966466	1.1838
chr11	91958279	FAT3	-0.00279439	0.00555384	0.617554	0.987518	1.20423
chr17	30846564	MYO1D	0.00788361	0.0157852	0.620147	0.966871	1.20327
chr11	91958119	FAT3	-0.00265081	0.00531715	0.620769	0.987982	1.19851
chr10	1102516	IDI1	0.00983449	0.0198349	0.622671	0.990715	1.19627
chr17	30846562	MYO1D	0.0077831	0.0157482	0.623787	0.96696	1.19253
chr11	91959750	FAT3	0.00315223	0.00641742	0.625905	0.983585	1.19075
chr17	30846558	MYO1D	0.0075824	0.0156741	0.631134	0.967136	1.19487
chr10	1102523	IDI1	0.00925995	0.0197941	0.642395	0.990732	1.21031
chr11	91958295	FAT3	-0.00268261	0.00575853	0.643788	0.98738	1.2071
chr11	91959062	FAT3	0.00291346	0.0063249	0.647495	0.98373	1.20825
chr17	30846549	MYO1D	0.00713246	0.0155077	0.647996	0.967524	1.20342
chr17	30846546	MYO1D	0.00698299	0.0154523	0.653718	0.967652	1.20829
chr11	91958304	FAT3	-0.00261309	0.00588429	0.659321	0.987298	1.2129
chr11	91958099	FAT3	-0.00242364	0.0055319	0.663598	0.987868	1.21504
chr11	91958309	FAT3	-0.00257262	0.00595712	0.668109	0.987251	1.21758
chr17	30846535	MYO1D	0.00643723	0.0152498	0.675143	0.96811	1.22468
chr11	91959050	FAT3	0.00266463	0.00635614	0.677243	0.983728	1.2228
chr10	1102536	IDI1	0.00818895	0.0197767	0.680981	0.99076	1.22388
chr11	91959767	FAT3	0.0026456	0.00641622	0.682245	0.983642	1.22053
chr11	91958317	FAT3	-0.00250538	0.0060777	0.682322	0.987174	1.21509
chr17	30846531	MYO1D	0.00623968	0.0151764	0.683108	0.968273	1.21096
chr7	99156586	ZNF655	-0.000872345	0.00213558	0.685045	0.980739	1.2089
chr17	30846529	MYO1D	0.0061411	0.0151398	0.687125	0.968354	1.20711
chr10	1102538	IDI1	0.00802371	0.019781	0.687126	0.990764	1.2017
chr7	99156588	ZNF655	-0.000862663	0.0021408	0.68907	0.98073	1.19972
chr10	1101905	IDI1	0.00927125	0.0232977	0.692735	0.986717	1.20074
chr17	30846526	MYO1D	0.00599346	0.0150849	0.693195	0.968474	1.19622
chr11	91958324	FAT3	-0.00244422	0.00618677	0.694837	0.987104	1.19377
chr17	30846524	MYO1D	0.00589519	0.0150483	0.697271	0.968554	1.1927
chr7	99156593	ZNF655	-0.00083856	0.00215456	0.699141	0.980708	1.19068
chr10	1102543	IDI1	0.00761002	0.0198001	0.70271	0.990774	1.19155
chr17	30846520	MYO1D	0.00569905	0.0149754	0.705493	0.968712	1.19109
chr10	1101900	IDI1	0.00856508	0.0228977	0.710288	0.986591	1.19402
chr11	91959776	FAT3	0.00236858	0.00641725	0.713956	0.983672	1.19503
chr10	1102547	IDI1	0.00727849	0.0198239	0.71539	0.990781	1.19232
chr7	99156602	ZNF655	-0.000795119	0.00218212	0.717448	0.980666	1.19066
chr11	91958078	FAT3	-0.0021148	0.0058132	0.717882	0.987689	1.18633
chr17	30846514	MYO1D	0.00540581	0.0148663	0.718003	0.968946	1.18152
chr10	1101897	IDI1	0.00814839	0.0226602	0.720999	0.986512	1.18147
chr7	99156605	ZNF655	-0.000780494	0.00219221	0.723643	0.980652	1.18084
chr11	91959779	FAT3	0.00227494	0.00641793	0.724806	0.983681	1.17781
chr10	1102550	IDI1	0.0070295	0.0198469	0.725014	0.990786	1.17326
chr10	1101895	IDI1	0.00787369	0.0225031	0.728209	0.986459	1.17356
chr10	1101893	IDI1	0.00760155	0.022347	0.735472	0.986404	1.18039
chr17	30846505	MYO1D	0.00496822	0.0147035	0.737167	0.969289	1.17826
chr7	99156615	ZNF655	-0.000730661	0.0022296	0.744799	0.980601	1.1856
chr11	91959785	FAT3	0.00208578	0.00641985	0.746912	0.9837	1.18413
chr17	30846499	MYO1D	0.00467803	0.0145956	0.75021	0.969513	1.18454
chr7	99156618	ZNF655	-0.000715277	0.00224206	0.751326	0.980584	1.18152
chr11	91958359	FAT3	-0.00211273	0.00676633	0.75644	0.986736	1.18479
chr17	30846496	MYO1D	0.00453341	0.0145419	0.756811	0.969624	1.18063
chr7	99156622	ZNF655	-0.000694382	0.00225964	0.760172	0.980561	1.18114
chr4	154605479	TLR2	-0.00774357	0.0253582	0.761632	0.910232	1.17872
chr4	154605476	TLR2	-0.00773937	0.0253609	0.761781	0.910211	1.17429
chr11	91958063	FAT3	-0.00184429	0.00605073	0.762056	0.98752	1.17009
chr4	154605468	TLR2	-0.00772708	0.0253679	0.762211	0.910152	1.16573
chr4	154605458	TLR2	-0.00770943	0.0253767	0.762817	0.910074	1.1621
chr4	154605450	TLR2	-0.00769345	0.0253838	0.763358	0.910008	1.1584
chr17	30846493	MYO1D	0.0043891	0.0144883	0.763466	0.969733	1.15408
chr4	154605702	TLR2	-0.00752321	0.02514	0.766259	0.910689	1.15383
chr4	154605717	TLR2	-0.00747707	0.025123	0.767497	0.910647	1.15125
chr4	154605725	TLR2	-0.00745111	0.025114	0.7682	0.910621	1.14788
chr4	154605727	TLR2	-0.00744447	0.0251117	0.76838	0.910614	1.14377
chr4	154605388	TLR2	-0.00751062	0.0254425	0.769331	0.909394	1.14083
chr4	154605384	TLR2	-0.00749505	0.0254466	0.769831	0.909348	1.13725
chr4	154605745	TLR2	-0.007382	0.0250924	0.770095	0.910548	1.13335
chr17	30846490	MYO1D	0.00424511	0.0144348	0.770174	0.969842	1.1292
chr4	154605751	TLR2	-0.00736006	0.0250863	0.770705	0.910524	1.12575
chr4	154605761	TLR2	-0.00732213	0.0250771	0.771771	0.910483	1.1231
chr4	154605364	TLR2	-0.00740998	0.0254678	0.772552	0.909105	1.12006
chr4	154605768	TLR2	-0.00729451	0.0250714	0.772557	0.910454	1.11592
chr4	154605357	TLR2	-0.0073773	0.0254754	0.773593	0.909015	1.11329
chr4	154605788	TLR2	-0.00720972	0.0250614	0.775039	0.910374	1.11127
chr4	154605346	TLR2	-0.00732283	0.0254879	0.775325	0.908869	1.10761
chr4	154605339	TLR2	-0.00728614	0.025496	0.776489	0.908773	1.10522
chr4	154605335	TLR2	-0.00726447	0.0255007	0.777176	0.908718	1.10218
chr4	154605332	TLR2	-0.00724787	0.0255043	0.777701	0.908675	1.09893
chr4	154605327	TLR2	-0.00721954	0.0255104	0.778598	0.908603	1.09622
chr4	154605321	TLR2	-0.00718445	0.0255177	0.779707	0.908516	1.09383
chr7	44349590	CAMK2B	0.00129401	0.00472285	0.785469	0.933686	1.09797
chr7	44349593	CAMK2B	0.00128675	0.00473566	0.787204	0.93349	1.09646
chr7	99156634	ZNF655	-0.00062871	0.00231969	0.787726	0.980481	1.09329
chr11	91959796	FAT3	0.00173257	0.0064256	0.788793	0.983735	1.09088
chr4	154605857	TLR2	-0.00677178	0.0252035	0.789521	0.910445	1.08803
chr15	28439572	HERC2	0.00534011	0.0202271	0.793097	0.140288	1.08911
chr15	28439576	HERC2	0.00533297	0.0202274	0.79337	0.140289	1.08566
chr19	33819897	CEBPA-AS1	-0.0066272	0.0251716	0.793652	0.180086	1.08225
chr4	154605870	TLR2	-0.00664391	0.0252576	0.793833	0.910572	1.07873
chr15	28439584	HERC2	0.00531866	0.0202281	0.793918	0.140291	1.0751
chr15	28439588	HERC2	0.00531147	0.0202284	0.794193	0.140292	1.07175
chr7	44349602	CAMK2B	0.00125079	0.00477878	0.794833	0.932813	1.06891
chr15	28439598	HERC2	0.00529346	0.0202293	0.794883	0.140295	1.06531
chr15	28439608	HERC2	0.00527535	0.0202301	0.795577	0.140297	1.06259
chr15	28439621	HERC2	0.00525167	0.0202312	0.796485	0.140301	1.06017
chr19	33819854	CEBPA-AS1	-0.00650313	0.0251881	0.797558	0.179205	1.05798
chr11	91958385	FAT3	-0.00184659	0.00721559	0.799295	0.986445	1.05669
chr19	33819832	CEBPA-AS1	-0.00642046	0.0251851	0.800051	0.178833	1.05412
chr4	154605893	TLR2	-0.00639474	0.0253172	0.801851	0.91081	1.05294
chr17	30846476	MYO1D	0.00357745	0.0141874	0.80218	0.970335	1.04983
chr7	44349608	CAMK2B	0.00120656	0.00481142	0.803244	0.932264	1.04771
chr17	30846473	MYO1D	0.00343531	0.0141349	0.809189	0.970438	1.05195
chr10	1101873	IDI1	0.00503154	0.0208512	0.81052	0.985796	1.05018
chr4	154605929	TLR2	-0.00604959	0.0253017	0.812221	0.910921	1.04889
chr11	91958394	FAT3	-0.00175178	0.00737111	0.813333	0.986342	1.04686
chr4	154605941	TLR2	-0.00595829	0.0252851	0.814882	0.910869	1.04541
chr7	44349614	CAMK2B	0.00113646	0.0048468	0.815783	0.931614	1.04313
chr11	91958396	FAT3	-0.00173059	0.00740556	0.81639	0.986319	1.0405
chr11	91958046	FAT3	-0.001481	0.00635963	0.817017	0.98728	1.0379
chr4	154605953	TLR2	-0.00587621	0.0252683	0.817266	0.910785	1.03485
chr4	154605961	TLR2	-0.00582531	0.0252575	0.818744	0.910715	1.03337
chr10	1102947	WDR37	-0.00677041	0.029391	0.81896	0.989276	1.03031
chr4	154605970	TLR2	-0.0057707	0.0252459	0.820332	0.910625	1.02871
chr4	154605984	TLR2	-0.00568964	0.0252292	0.822697	0.910468	1.02837
chr10	1102942	WDR37	-0.00656778	0.0293387	0.823977	0.989309	1.02668
chr4	154605993	TLR2	-0.00563919	0.0252193	0.824174	0.910358	1.02366
chr4	154606004	TLR2	-0.00557863	0.0252081	0.825955	0.910217	1.02261
chr10	1102939	WDR37	-0.00645372	0.0293072	0.826801	0.989329	1.02042
chr4	154606018	TLR2	-0.00550261	0.0251952	0.828202	0.910027	1.01892
chr11	91959807	FAT3	0.00137117	0.00643474	0.832314	0.983767	1.02076
chr10	1102917	WDR37	-0.0057678	0.029072	0.843715	0.989475	1.0315
chr11	91958037	FAT3	-0.00126192	0.00654153	0.847983	0.987131	1.03348
chr10	1102892	WDR37	-0.00525778	0.0287904	0.855994	0.98964	1.03999
chr10	1102888	WDR37	-0.00519804	0.0287432	0.857381	0.989666	1.03844
chr10	1102879	WDR37	-0.00508149	0.0286331	0.860014	0.989725	1.03841
chr10	1102863	WDR37	-0.00492146	0.0284176	0.863359	0.98983	1.03923
chr10	1102861	WDR37	-0.00490425	0.0283884	0.863694	0.989842	1.03643
chr10	1102856	WDR37	-0.0048633	0.0283134	0.864466	0.989874	1.03418
chr10	1102840	WDR37	-0.00474783	0.0280528	0.866435	0.989973	1.03336
chr10	1102837	WDR37	-0.00472805	0.0280006	0.866741	0.989991	1.03058
chr10	1102835	WDR37	-0.00471507	0.0279653	0.866937	0.990003	1.02768
chr7	44349663	CAMK2B	-0.00101788	0.00606794	0.867607	0.923854	1.02535
chr10	1102827	WDR37	-0.00466422	0.0278194	0.867674	0.990051	1.02234
chr11	91959816	FAT3	0.00106935	0.00644518	0.86904	0.983793	1.02086
chr10	1102790	WDR37	-0.00440609	0.0270602	0.871456	0.990259	1.02062
chr17	30846447	MYO1D	0.00221751	0.0136878	0.872096	0.971292	1.01832
chr11	91957963	FAT3	0.00139314	0.0086163	0.872346	0.985159	1.01557
chr10	1102782	WDR37	-0.00433403	0.0268788	0.872694	0.990301	1.01295
chr10	1102780	WDR37	-0.00431454	0.0268325	0.873044	0.990311	1.01035
chr10	1102758	WDR37	-0.00405067	0.026296	0.878333	0.99042	1.01346
chr16	148510	NPRL3	0.00293735	0.019319	0.879897	0.325587	1.01227
chr10	1102744	WDR37	-0.0038233	0.0259257	0.883483	0.990484	1.01341
chr16	148466	NPRL3	0.00285888	0.0193943	0.883532	0.320984	1.01049
chr11	91958027	FAT3	-0.000994996	0.00675963	0.883698	0.986945	1.00773
chr16	148457	NPRL3	0.00276445	0.0194192	0.887496	0.319816	1.00911
chr7	99156851	ZNF655	-0.000966553	0.00695228	0.89011	0.97293	1.00914
chr11	91958024	FAT3	-0.000909869	0.00682848	0.894651	0.986885	1.01134
chr10	1101851	IDI1	0.00255751	0.0193748	0.895629	0.984971	1.00952
chr16	148419	NPRL3	0.00256107	0.0194076	0.89566	0.316354	1.00665
chr19	35264119	ZNF599	0.00296099	0.0236774	0.901091	0.82302	1.00984
chr19	35264128	ZNF599	0.00277496	0.0236857	0.907307	0.822959	1.0139
chr19	35264134	ZNF599	0.00267053	0.0236918	0.910803	0.822928	1.0149
chr7	99156836	ZNF655	-0.000703815	0.0063475	0.912252	0.974116	1.01361
chr19	35264137	ZNF599	0.00261925	0.0236955	0.912522	0.822917	1.01103
chr10	1102609	IDI1	0.00231375	0.0211368	0.913368	0.990827	1.0091
chr10	1102611	IDI1	0.00216883	0.0212046	0.919032	0.990826	1.01249
chr7	99156831	ZNF655	-0.000626103	0.00615427	0.919463	0.974477	1.01011
chr11	91957976	FAT3	0.000805339	0.00816962	0.921954	0.985619	1.01001
chr6	99048189	PNKY	-0.00214923	0.0231704	0.926548	0.226142	1.0122
chr6	99048169	PNKY	-0.00214266	0.0231725	0.926779	0.22612	1.00962
chr6	99048153	PNKY	-0.00213732	0.0231742	0.926966	0.226103	1.00701
chr11	91957979	FAT3	0.000677392	0.00807172	0.933527	0.985717	1.01132
chr10	1101841	IDI1	0.00156613	0.0187701	0.93391	0.984529	1.00893
chr7	44349656	CAMK2B	-0.000444323	0.00561154	0.937275	0.925113	1.00977
chr17	30846421	MYO1D	0.00102547	0.0132573	0.93872	0.972077	1.00854
chr7	44349642	CAMK2B	0.000340658	0.00512436	0.94732	0.927439	1.01499
chr10	1102624	IDI1	0.00125915	0.0216701	0.953947	0.990818	1.01929
chr7	99156709	ZNF655	-0.000174114	0.00303251	0.954493	0.979492	1.01708
chr7	99156712	ZNF655	-0.000159685	0.00307599	0.95885	0.97943	1.01894
chr11	91958719	FAT3	-0.000411879	0.00836073	0.960948	0.983702	1.0184
chr7	44349644	CAMK2B	0.00025111	0.00516869	0.961488	0.927114	1.01621
chr11	91958006	FAT3	-0.000347111	0.00727685	0.962186	0.986482	1.0142
chr11	91958686	FAT3	-0.000356455	0.00870315	0.967529	0.983805	1.01708
chr11	91958675	FAT3	-0.000332163	0.00881398	0.970121	0.983848	1.01706
chr17	30846388	MYO1D	-0.00044999	0.0127401	0.971995	0.972976	1.0163
chr11	91957989	FAT3	0.000271616	0.00775941	0.972246	0.986025	1.01384
chr10	1102632	IDI1	0.000729145	0.0219738	0.97369	0.99081	1.01264
chr7	44349652	CAMK2B	-0.00017726	0.00542383	0.974087	0.925795	1.01036
chr11	91958655	FAT3	-0.000285964	0.00900379	0.974817	0.983936	1.00843
chr17	30846407	MYO1D	0.000394396	0.0130336	0.976007	0.972472	1.00699
chr7	44349646	CAMK2B	0.000155301	0.0052199	0.976409	0.926788	1.00475
chr7	99156782	ZNF655	-0.000131988	0.00453188	0.976907	0.977231	1.00261
chr11	91958643	FAT3	-0.000259654	0.00910699	0.977392	0.983996	1.00048
chr11	91958585	FAT3	-0.000214155	0.00941389	0.981961	0.984361	1.00253
chr11	91958598	FAT3	-0.000206432	0.00937973	0.982548	0.984268	1.00051
chr11	91957992	FAT3	0.000156008	0.00766989	0.983871	0.986111	0.999244
chr10	1102637	IDI1	0.000410278	0.0221682	0.985324	0.990804	0.99812
chr17	30846393	MYO1D	-0.000229124	0.0128161	0.985823	0.972847	0.996039
chr7	99156745	ZNF655	-6.02967e-05	0.00364945	0.986898	0.978588	0.994548
chr7	99156762	ZNF655	-6.46442e-05	0.0040205	0.98725	0.978026	0.992339
chr11	91957995	FAT3	4.3175e-05	0.00758226	0.995484	0.986195	0.998043
chr10	1102644	IDI1	-1.93344e-05	0.0224441	0.999317	0.990794	0.999317
